# Supplementary material
Source: PubMed Central journal article supplement (PMC2586148)
Supplement: NIHMS69717-supplement-01.pdf [file NIHMS69717-supplement-01.pdf]

## Supplemental Data

### **XBP1 Links ER Stress to Intestinal Inflammation and Confers Genetic Risk for Human Inflammatory Bowel Disease**

Arthur Kaser, Ann-Hwee Lee, Andre Franke, Jonathan N. Glickman, Sebastian Zeissig, Herbert Tilg, Edward E.S. Nieuwenhuis, Darren E. Higgins, Stefan Schreiber, Laurie H. Glimcher, and Richard S. Blumberg

#### **Supplemental Figure legends**

**Figure S1. Generation of *Xbp1*<sup>flox</sup> mice.** **A.** Schematic representation of the gene targeting strategy. A floxed *Xbp1* allele was generated by homologous recombination in W4/129 embryonic stem (ES) cells. The targeting vector contains a loxP site in intron 2 and a floxed neomycin resistance gene cassette (neo) in intron 1 of the *Xbp1* gene. A targeted ES cell clone identified by Southern blot was injected into C57BL/6 blastocysts to obtain chimeras, which were subsequently bred to establish the *Xbp1*<sup>floxneo</sup> strain. *Xbp1*<sup>floxneo</sup> mice were mated with *Ellacre* transgenic mice to induce a partial *Cre*-mediated recombination. Male mice with the greatest deletion of the neo cassette were mated with wild type female mice to obtain an *Xbp1*<sup>flox</sup> strain. **B.** Breeding of *Xbp1*<sup>flox</sup> mice with Villin-(V)*Cre* transgenic mice resulted in the deletion of exon 2 of the *Xbp1* gene as confirmed by Southern blot. Total RNAs were isolated from small intestinal mucosal scrapings of untreated (NT) or mice injected with 1 mg/kg tunicamycin and harvested 6h later, and analyzed for the expression of XBP1 mRNA by Northern blot and RT-PCR followed by DNA sequencing. The mutant XBP1 mRNA produced by *Xbp1*<sup>Δ/Δ</sup> mice is slightly smaller than the wild type XBP1 mRNA, due to the deletion of exon 2 as confirmed by DNA sequencing of the cDNA. The IRE1 splicing site of XBP1 mRNA is located downstream of the floxed exon 2 in exon 4, which hence allowed us to monitor splicing status in mRNA transcribed from floxed and *Cre*-deleted *Xbp1* alleles alike. Absence of XBP1 protein was confirmed by Western blotting of small intestinal mucosal scraping protein lysates from untreated and tunicamycin-injected mice (\*, nonspecific band). **C.** Deletion of exon 2 in the mutant XBP1 mRNA resulted in the change of the translational reading frame, introducing a premature translational termination codon. **D.** Truncated XBP1 protein is not functional as evidenced by its failure to upregulate expression of a prototypical XBP1s target gene, ERdj4 (*Dnajb9*) upon ER stress induction through tunicamycin injection (Lee et al., 2003), as determined by qPCR on small intestinal mucosal scraping specimens (mean ± SEM). In contrast, tunicamycin injection led to upregulation of Chop (*Ddit3*) mRNA expression, transcriptionally regulated by PERK-Atf4 during ER stress, in *XBP1*<sup>flox/flox</sup>V*Cre* mice, indicating that other branches of the UPR are intact in the presence of a non-functional, truncated XBP1. **E.** Livers and spleens of *Xbp1*<sup>flox/flox</sup>V*Cre* (*Xbp1*<sup>-/-</sup>) and *Xbp1*<sup>flox/flox</sup> (*Xbp1*<sup>+/+</sup>) mice were analyzed for XBP1 mRNA levels (primers binding in the floxed region) quantified by qPCR (*n* = 2 per group, mean ± SEM)

**Figure S2. VillinCre-mediated *Xbp1* deletion leads to Chop induction, intestinal inflammation, and does not affect colonic goblet cells or small intestinal enteroendocrine cells.** **A.** Chop (*Ddit3*) mRNA expression was analyzed in small intestinal mucosal scrapings from *Xbp1*<sup>+/+</sup> and *Xbp1*<sup>-/-</sup> mice ( $n = 7$  per group, mean  $\pm$  SEM). **B.** H&E stains of *Xbp1*<sup>+/+</sup> small intestine, showing polymorphonuclear infiltration in the lamina propria (arrows point toward neutrophils between crypts). **C.** Goblet cells in the large intestine were identified by PAS staining ( $n = 3$  per genotype). **D.** Chromogranin<sup>+</sup> cells per immunostained section were quantified by light microscopy ( $n = 4$  per group, mean  $\pm$  SEM).

**Figure S3. *Xbp1* deletion does not regulate genes involved in intestinal cell fate decisions.** **A.** Expression of indicated genes was analyzed in small intestinal mucosal scrapings of *Xbp1*<sup>+/+</sup> and *Xbp1*<sup>-/-</sup> mice.  $n = 11-19$  per group, mean  $\pm$  SEM. Two-tailed Student's *t*-test. No significant differences were observed. **B.** Small intestinal paraffin-embedded sections were stained by anti- $\beta$ -catenin. Representative of 5 specimens per genotype.

**Figure S4. *Xbp1* deletion leads to the presence of apoptotic cells in the epithelium.** **A.** Apoptotic nuclei were identified in *Xbp1*<sup>+/+</sup> (*Xbp1*<sup>flox/flox</sup>) and *Xbp1*<sup>-/-</sup> (*Xbp1*<sup>flox/flox</sup>*VCre*) sections by TUNEL staining. Arrows point to apoptotic cells. **B.** Deletion of *Xbp1* gene in *Xbp1*<sup>floxneo/floxneo</sup>*VCreER*<sup>T2</sup> mice was induced by a 5 day administration of 1 mg tamoxifen intraperitoneally daily, and apoptotic cells stained by an anti-active (cleaved) caspase-3 antibody. Time-points in the figure indicate the length after start of tamoxifen administration. Arrows point to apoptotic cells.

**Figure S5. Inhibitors of p38 and ERK1/2 phosphorylation do not affect CXCL1 secretion in XBP1-silenced MODE-K cells.** **A.** MODE-K.iXBP (filled symbols) and MODE-K.Ctrl (open symbols) cells were stimulated for 4h with 50ng/ml TNF $\alpha$  in the presence of the indicated optimal concentrations of inhibitors (PD98059, inhibitor of MAP kinase kinase [MEK]; SB203580, p38 kinase inhibitor; U0126, MEK1/MEK2 inhibitor). Supernatants were assayed for CXCL1. **B.** Experiment as in (A), except for stimulation with 10 $\mu$ g/ml flagellin instead of TNF $\alpha$ . Triplicates, mean  $\pm$  SEM in (A) and (B).

**Figure S6. XBP1-silenced MODE-K cells are more sensitive to TNF $\alpha$  induced apoptosis.** **A.** MODE-K.Control and MODE-K.iXBP cells were cultured for 4 h in medium alone, 50 ng/ml TNF $\alpha$ , or 10  $\mu$ g/ml flagellin, trypsinized and analyzed for intracellular presence of cleaved caspase-3 by flow cytometry. Duplicates, mean  $\pm$  SEM. **B.** Same experiment as in (A) with cells stimulated with 50 ng/ml TNF $\alpha$ , except for that adherent cells were fixed and stained for cleaved caspase-3 (red) and nuclei (DAPI; blue) by immunofluorescence.

**Figure S7. Antibiotic treatment during 7% DSS colitis abrogates genotype-related differences in susceptibility to colitis.** **A.** *Xbp1*<sup>+/+</sup> ( $n = 6$ ) and *Xbp1*<sup>-/-</sup> ( $n = 4$ ) littermates were treated with antibiotics (neomycin sulfate, 1.5g/l; metronidazole, 1.5g/l) in drinking water during the 5 days of high-dose DSS (7%; commensal flora-depleted mice are less susceptible to DSS colitis, which requires an increase in DSS dose to achieve colonic inflammation) administration as well as during the subsequent time on regular drinking water. Wasting was monitored by daily weight measurements. **B.** Colonic specimens harvested on day 8 of 7% DSS colitis in the presence of antibiotics were histologically assessed for inflammation. Two-tailed Mann-Whitney test. Mean  $\pm$  SEM in (A) and (B).

**Figure S8. Regional association plot and structure of linkage disequilibrium (LD) across the *XBPI* gene.** **A.** Plot of the negative logarithm<sub>10</sub> of the *P*-values obtained in fine mapping of the 120 kb region around the *XBPI* candidate gene. Twenty tagging SNPs were genotyped in overall 5322 controls, 2762 Crohn's disease (CD), and 1627 ulcerative colitis (UC) patients (combined Panel 1+2+3). Negative log *P*-values are also shown for the combined inflammatory bowel disease (IBD) panel (CD+UC). The red dotted line corresponds to a significance threshold of 0.05 and the blue dotted line to the significance threshold according to the Bonferroni correction for multiple testing applied to the fine mapping results ( $n = 20$ ). Positions are in NCBI's build 35 coordinates. For genotype counts see Supplementary Table 2. Panel **B.** shows the plotted recombination rate (in centimorgans [cM] per Mb), while **C.** shows the sequence conservation score based on 16 different species (taken from UCSC Genome Browser, Vertebrate Multiz Alignment & Conservation). **D.** The position and intron/exon structure of underlying genes. Panel **E.** shows the pairwise LD in the combined sample for the 20 genotyped variants using the metric  $r^2$  and the GOLD color scheme.

**Figure S9. Deep sequencing of *XBPI*.** All five exons and 4.3 kb of 5' upstream sequence were resequenced in 282 unaffected controls, 282 Crohn's disease, and 282 ulcerative colitis patients (total of 846 samples); the five *XBPI* exons were sequenced in 282 additional ulcerative colitis patients resulting in a total of 1128 patient and control DNAs analyzed. Chromosomal location of *XBPI* and amplicons used for sequencing are shown in the context of *XBPI*s and *XBPI*u transcripts. The panel underneath the transcript panel shows the sequence conservation score based on 16 different species (taken from UCSC Genome Browser, Vertebrate Multiz Alignment & Conservation). SNPs are presented in the context of their genomic localization. SNPs of particular interest are highlighted by color-coding as indicated. The labeling "full panel, genotyping" indicates that in addition to sequencing, actual frequencies were determined in panels 1+2+3 (common SNPs) and panels 1+2 (all 5 novel rare nsSNPs, including *XBPI*snp22), respectively, while "sequencing cohort" refers to the 1128 patients and controls described above. For further details on deep sequencing see Supplementary Table 4.

**Figure S10. The rare non-synonymous *XBPI*snp22 (P15L) variant does not affect UPRE transactivation.** **A.** MODE-K cells were transfected with UPRE-luciferase and unspliced h*XBPI*u expression plasmids harbouring the rare, minor allele of *XBPI*snp22 (P15L), which occurs at equal frequencies in IBD patients and controls (Supplementary Table 4). Luciferase activity (values presented normalized to cotransfected *Renilla* activities) was assessed in transfected cells treated with and without 1  $\mu$ g/ml tunicamycin. **B.** Experiments as in (A), except that spliced h*XBPI*s cDNA P15L variant was transfected into MODE-K cells (in the absence of tunicamycin treatment). Duplicates, mean  $\pm$  SD in (A) and (B).

**Figure S11. IEC-specific *XBPI* deficiency leads to Paneth cell dysfunction and a pro-inflammatory tone of the mucosa.** **A.** Regular function of the IRE1/*XBPI* axis. Continuous ER stress due to the high protein burden in IEC (in particular Paneth cells) leads to activation of the UPR and low-level baseline *XBPI* splicing. *XBPI*s protein regulates transcription of *XBPI*s target genes, required for normal IEC and Paneth cell function. **B.** Decrease or absence of functional *XBPI* proteins leads to a decrease in the expression of *XBPI*s target genes, and hence an inefficient UPR and accumulation of misfolded or unfolded proteins in highly secretory IECs and Paneth cells. This leads to increased ER stress, which leads dominantly to overactivation of IRE1 $\alpha$  through a yet to be defined mechanism, which manifests in our model as increased *XBPI* splicing and – presumably through TRAF2 – as increased JNK phosphorylation upon ligation of

TNFR1 with TNF $\alpha$  or TLR5 with flagellin. The aforementioned increased ER stress in the absence of XBP1s protein leads further to increased expression of Chop, a major link between the UPR and apoptosis, which results in Paneth cell dysfunction and apoptosis. Alterations in the composition of the intestinal microbiota, or increased bacterial burden due to defensin deficiency in epithelium with impaired or absent Paneth cell function, might lead to increased flagellin expression, further fueling the pro-inflammatory JNK pathway that in turn increases pro-inflammatory gene expression including TNF $\alpha$ . TNF $\alpha$  consequently binds to TNFR1, with the TRAF2-IRE1 interaction further increasing phosphorylation of JNK. As a consequence, intestinal inflammation with features characteristic of IBD develops spontaneously.

# Supplementary Figure 1

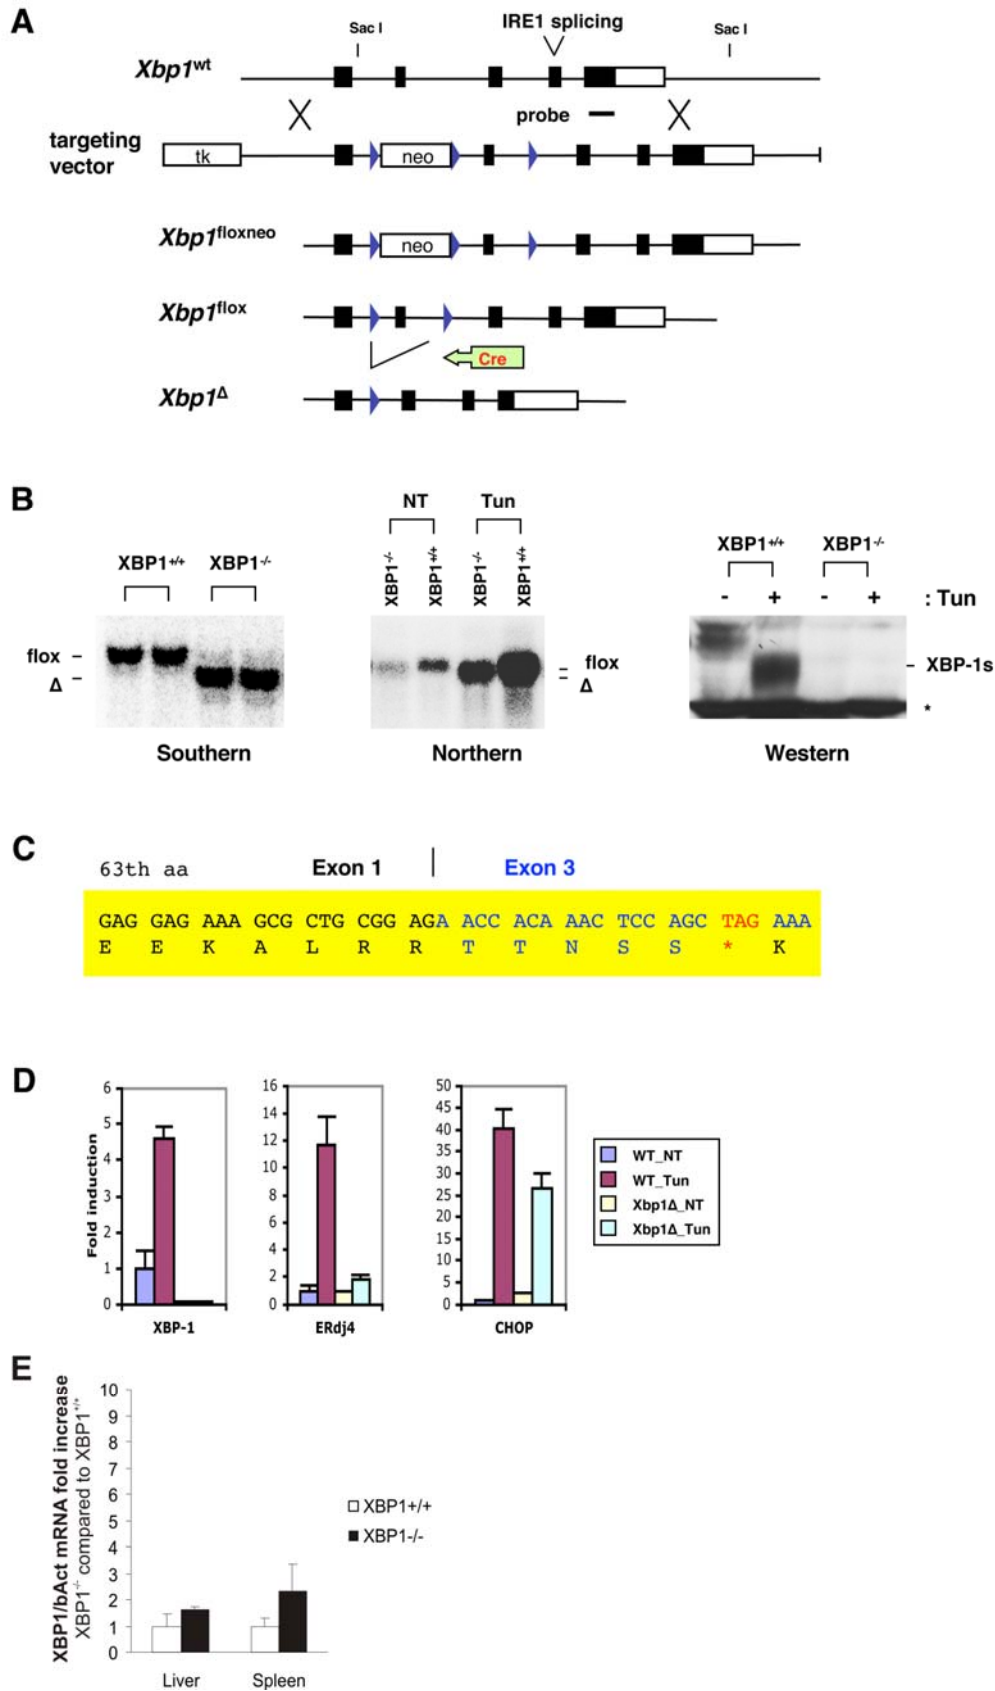

Supplementary Figure 2

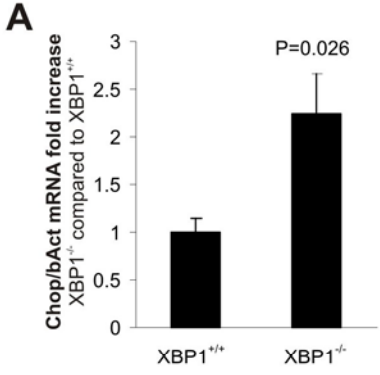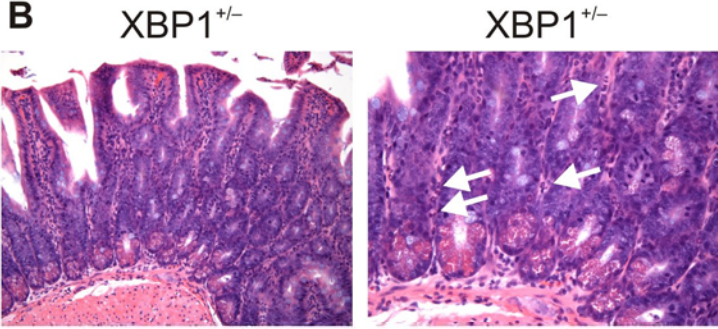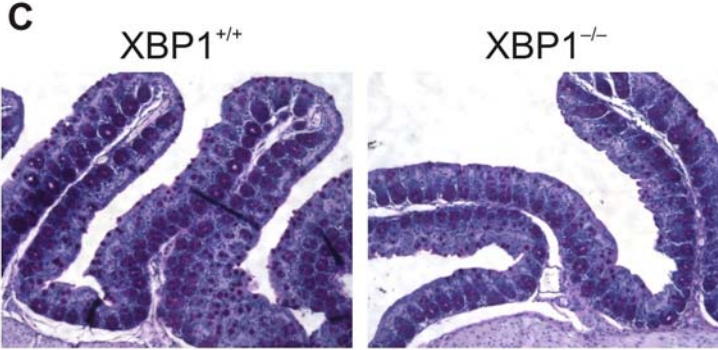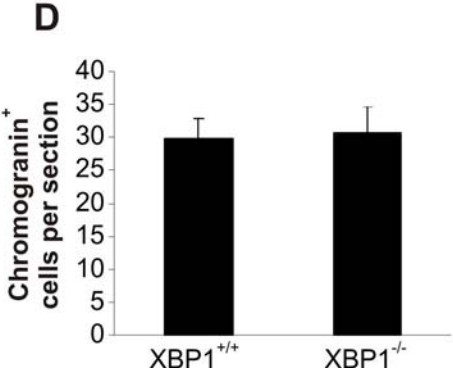

Supplementary Figure 3

**A**

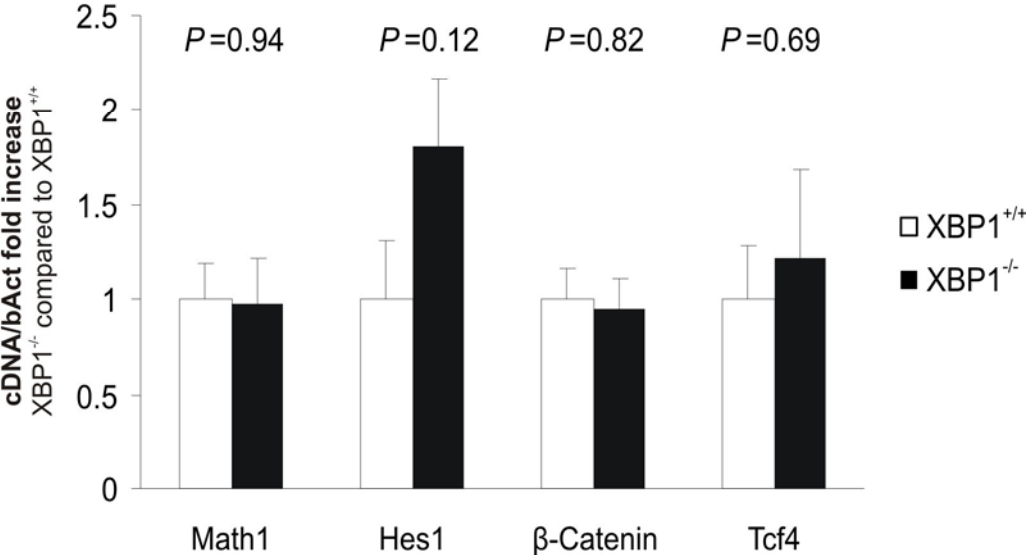

**B**

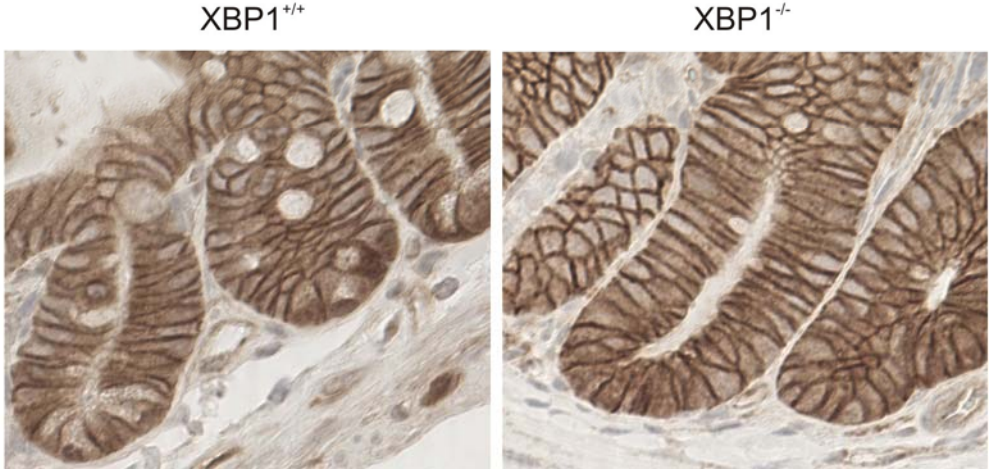

Supplementary Figure 4

**A**

TUNEL

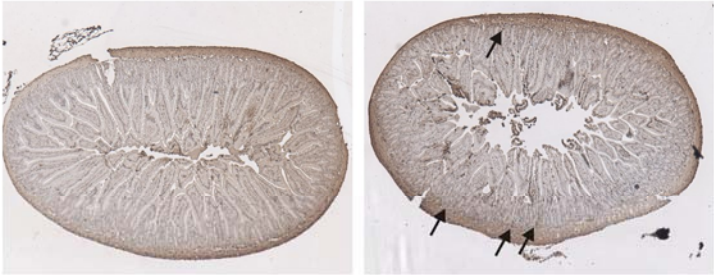

**B**

active caspase-3

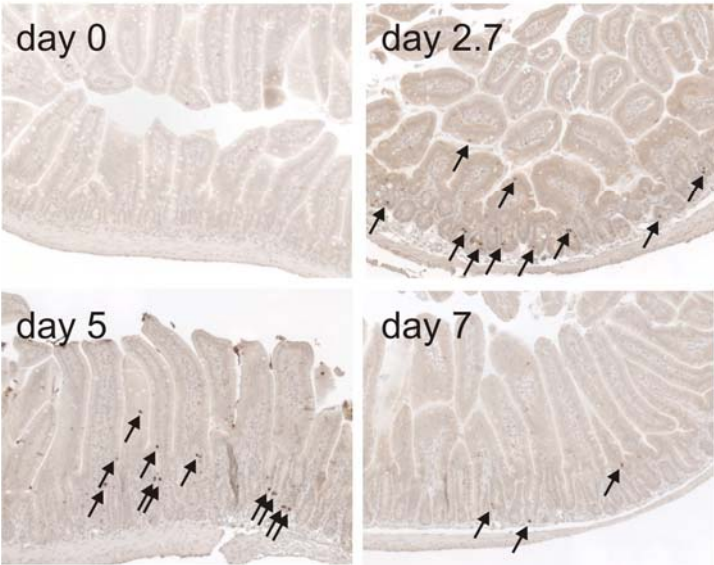



Supplementary Figure 5

**A**

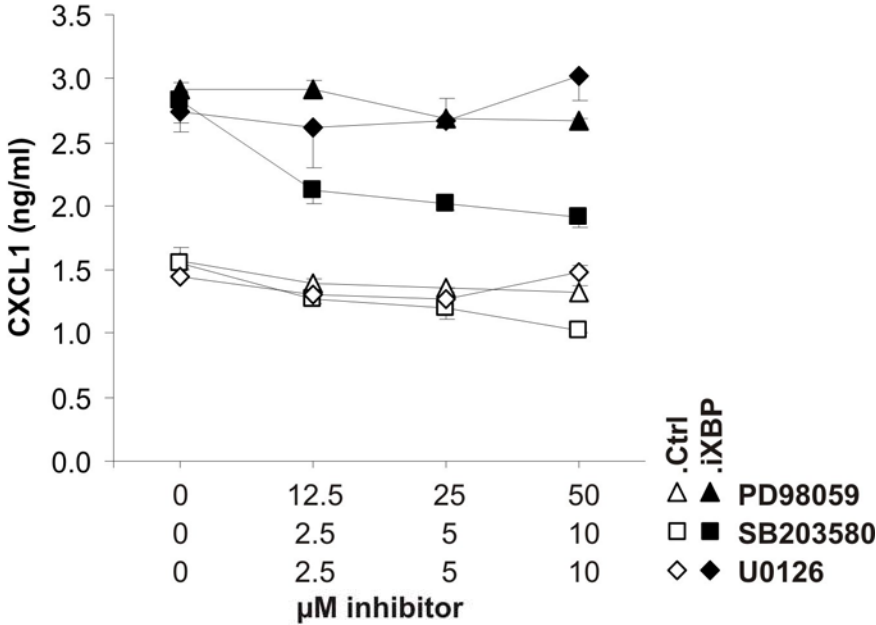

**B**

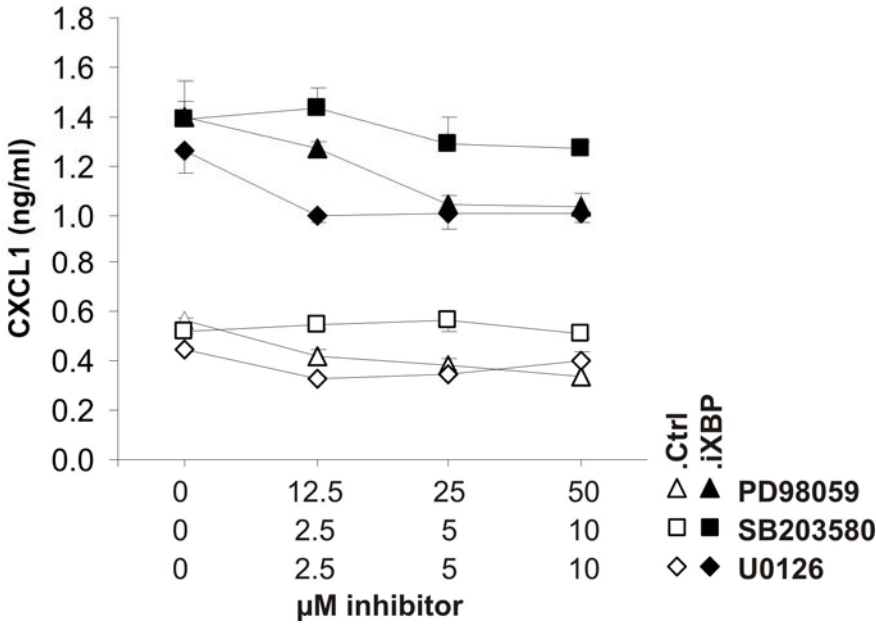

Supplementary Figure 6

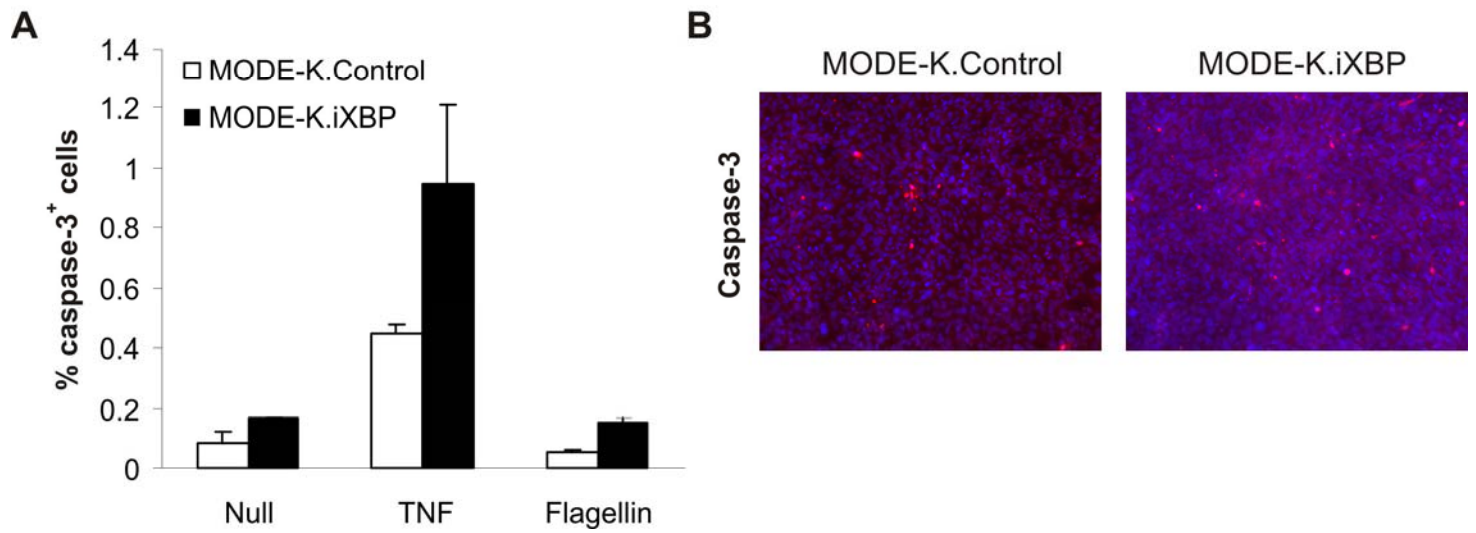

# Supplementary Figure 7

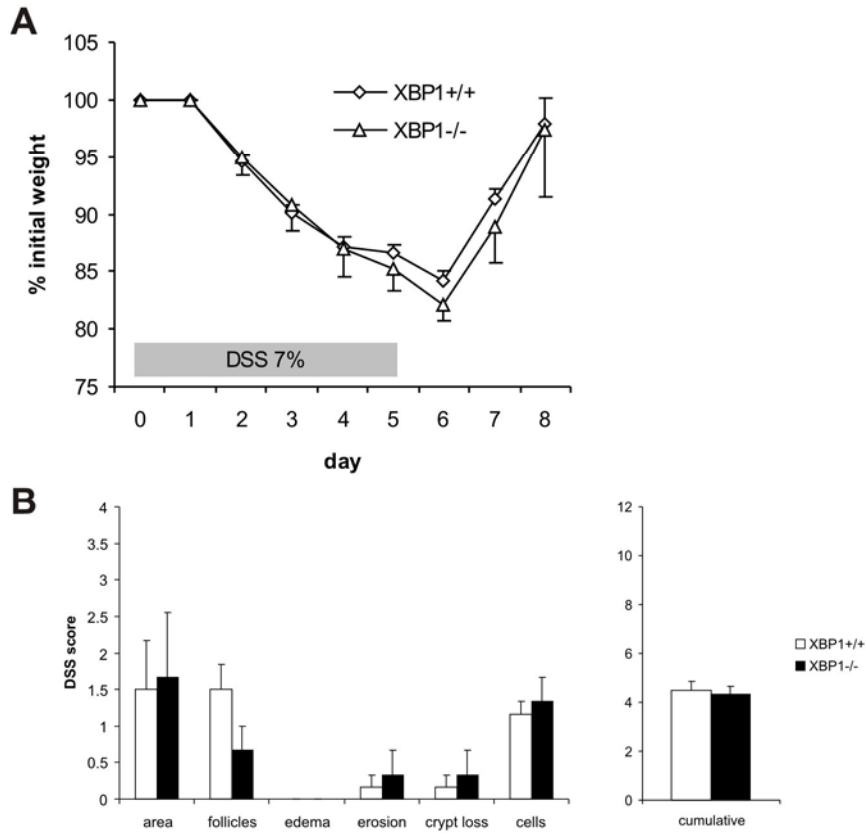

# Supplementary Figure 8

**A**

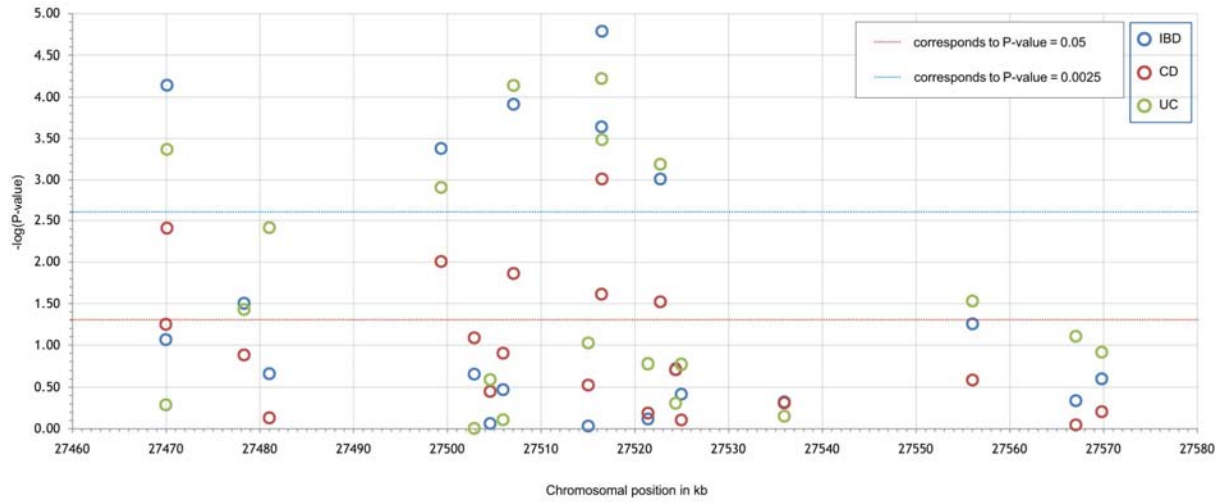

**B**

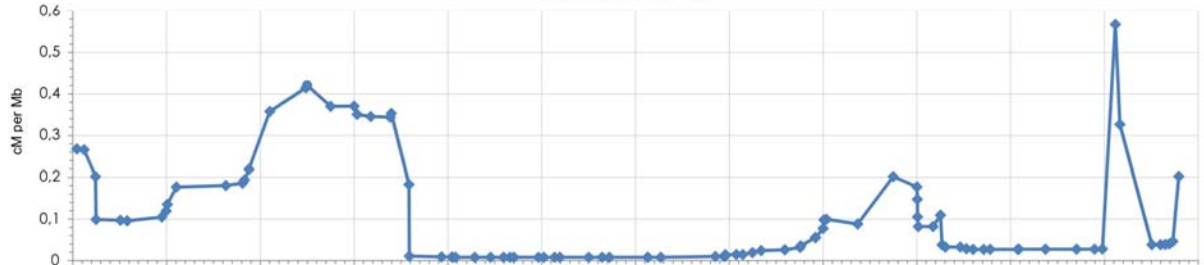

**C**

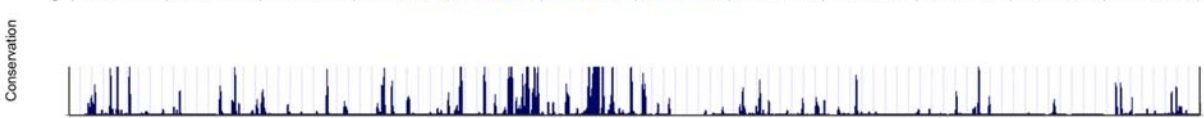

**D**

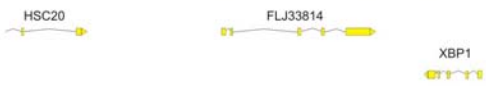

**E**

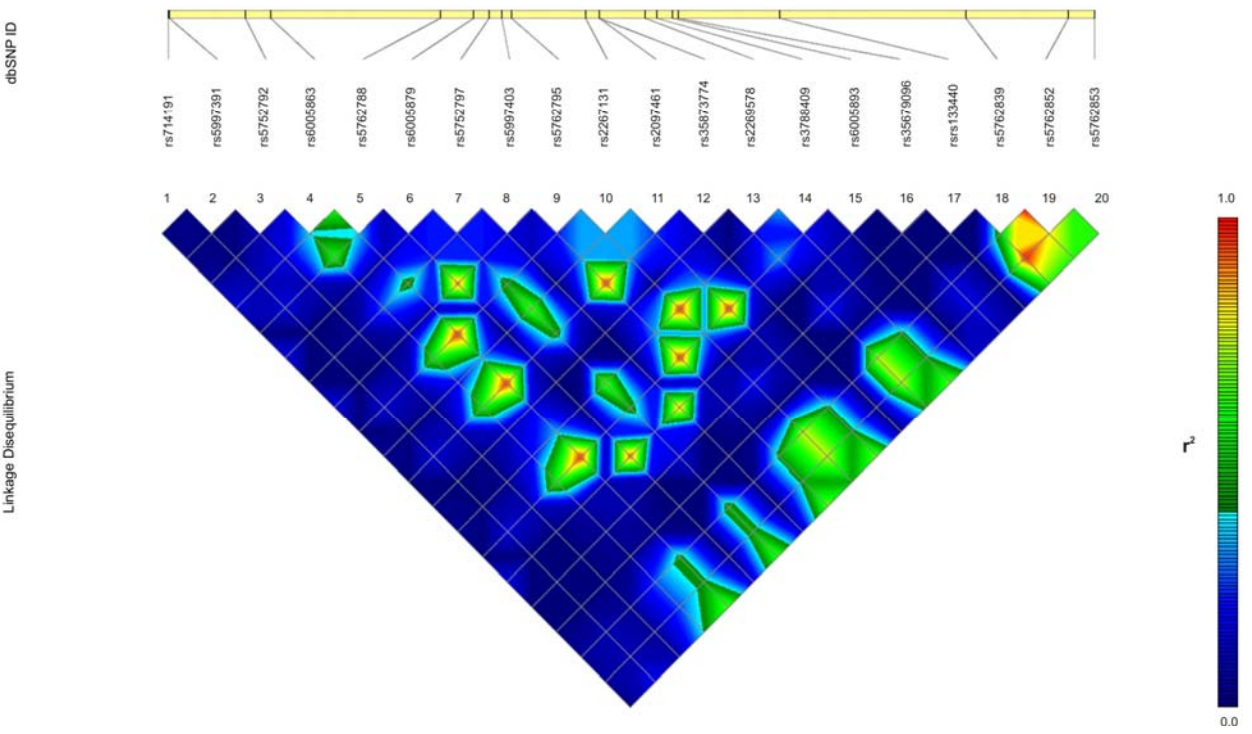

# Supplementary Figure 9

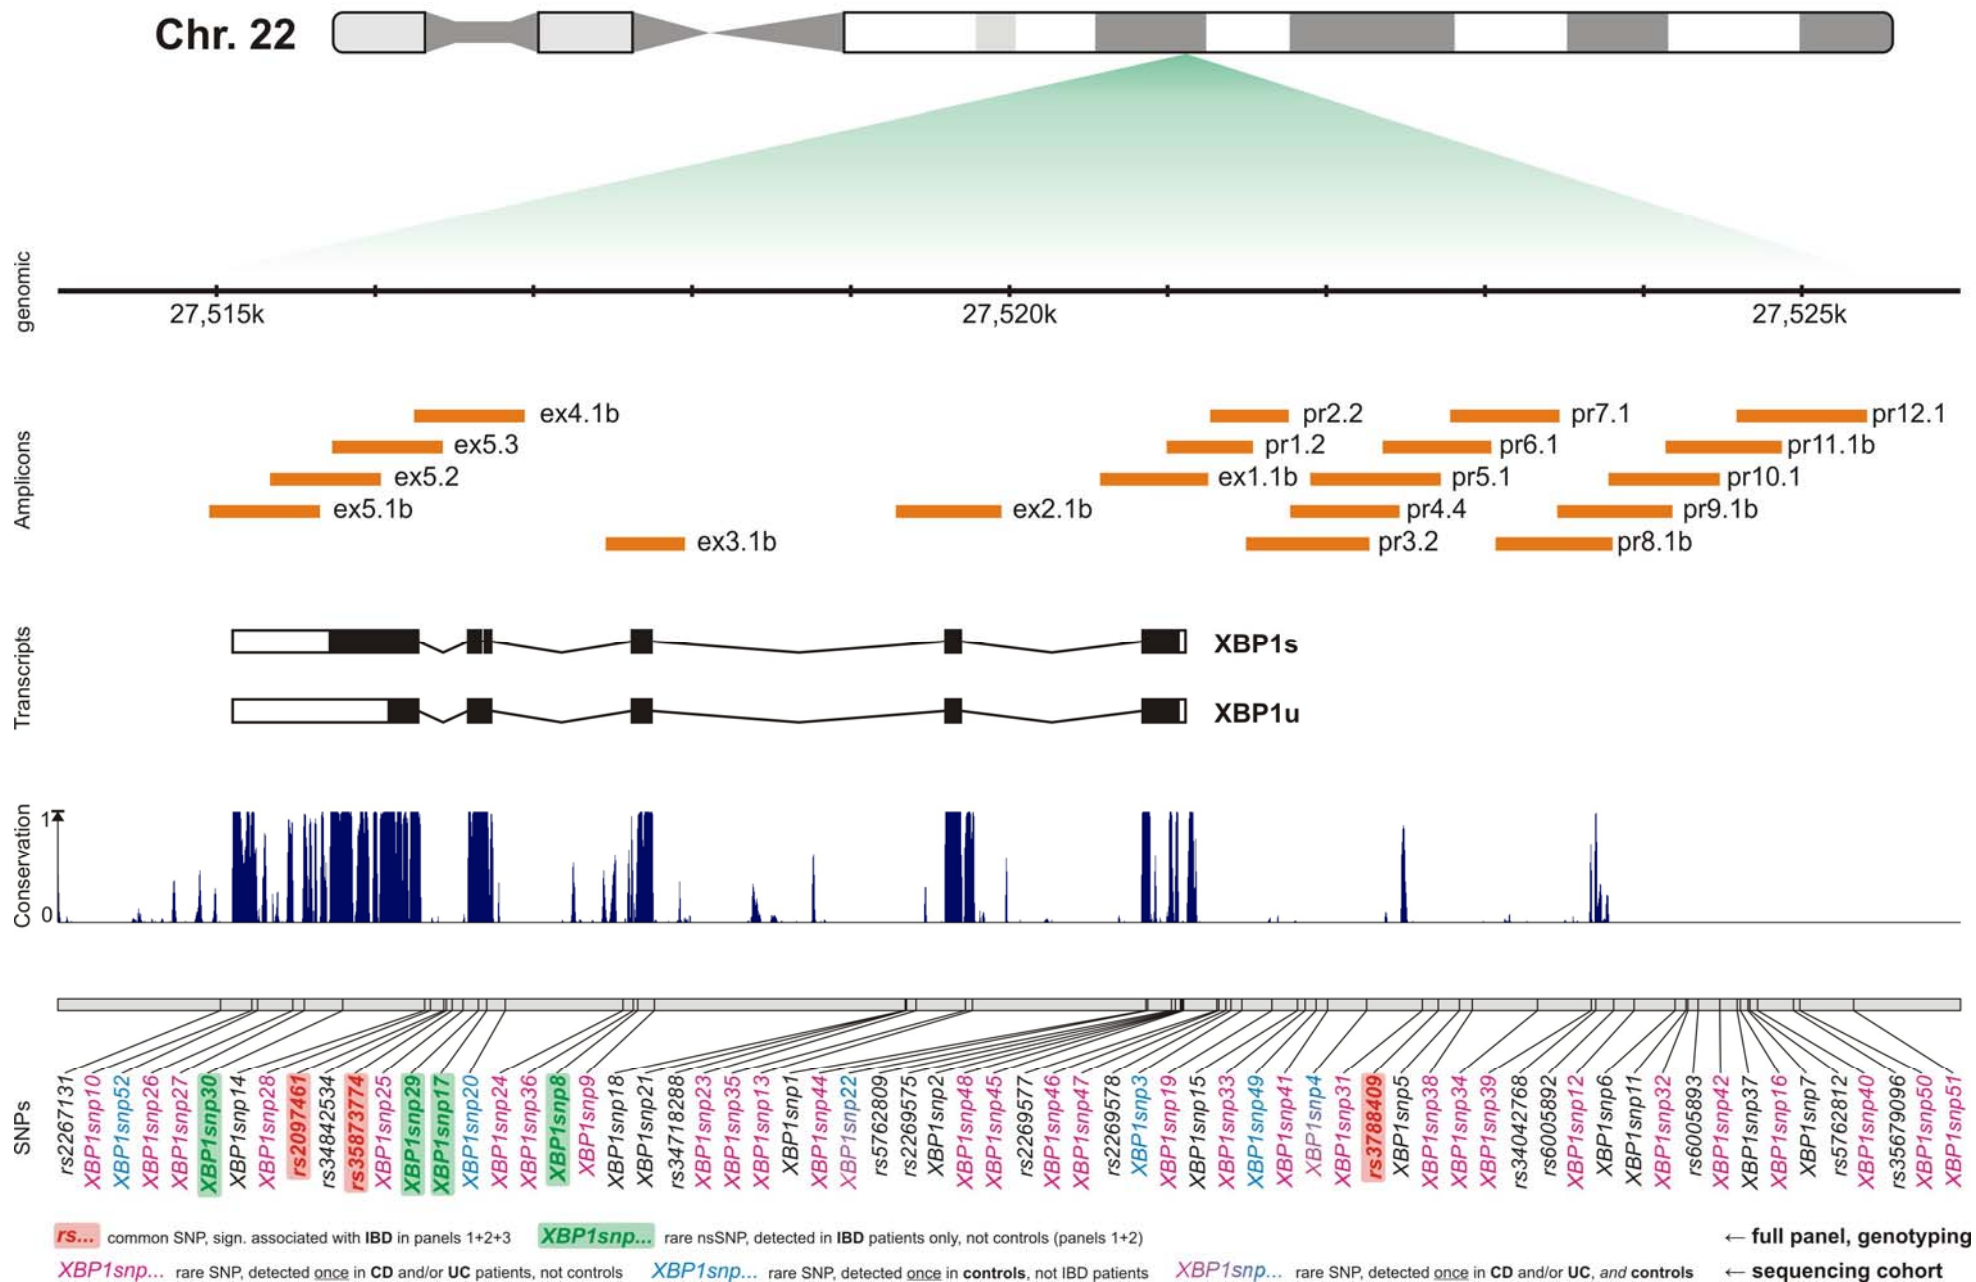

Supplementary Figure 10

**A**

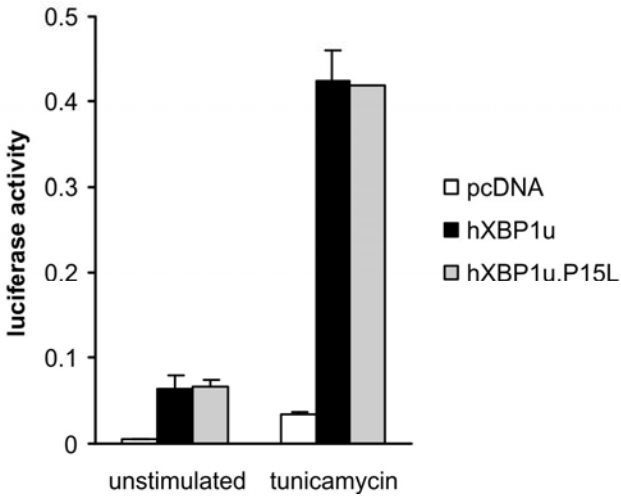

**B**

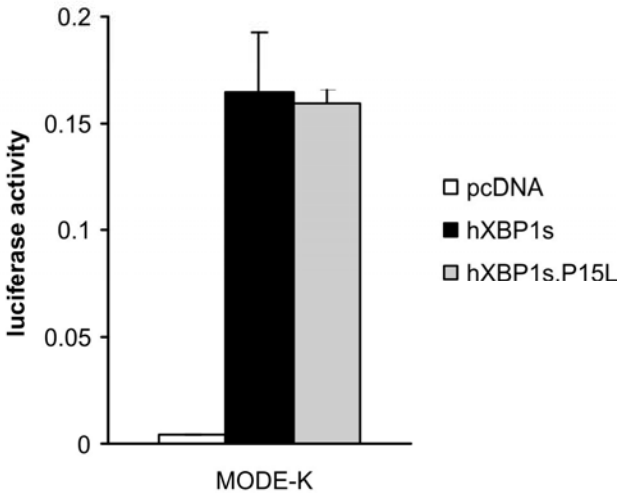



Supplementary Figure 11

A

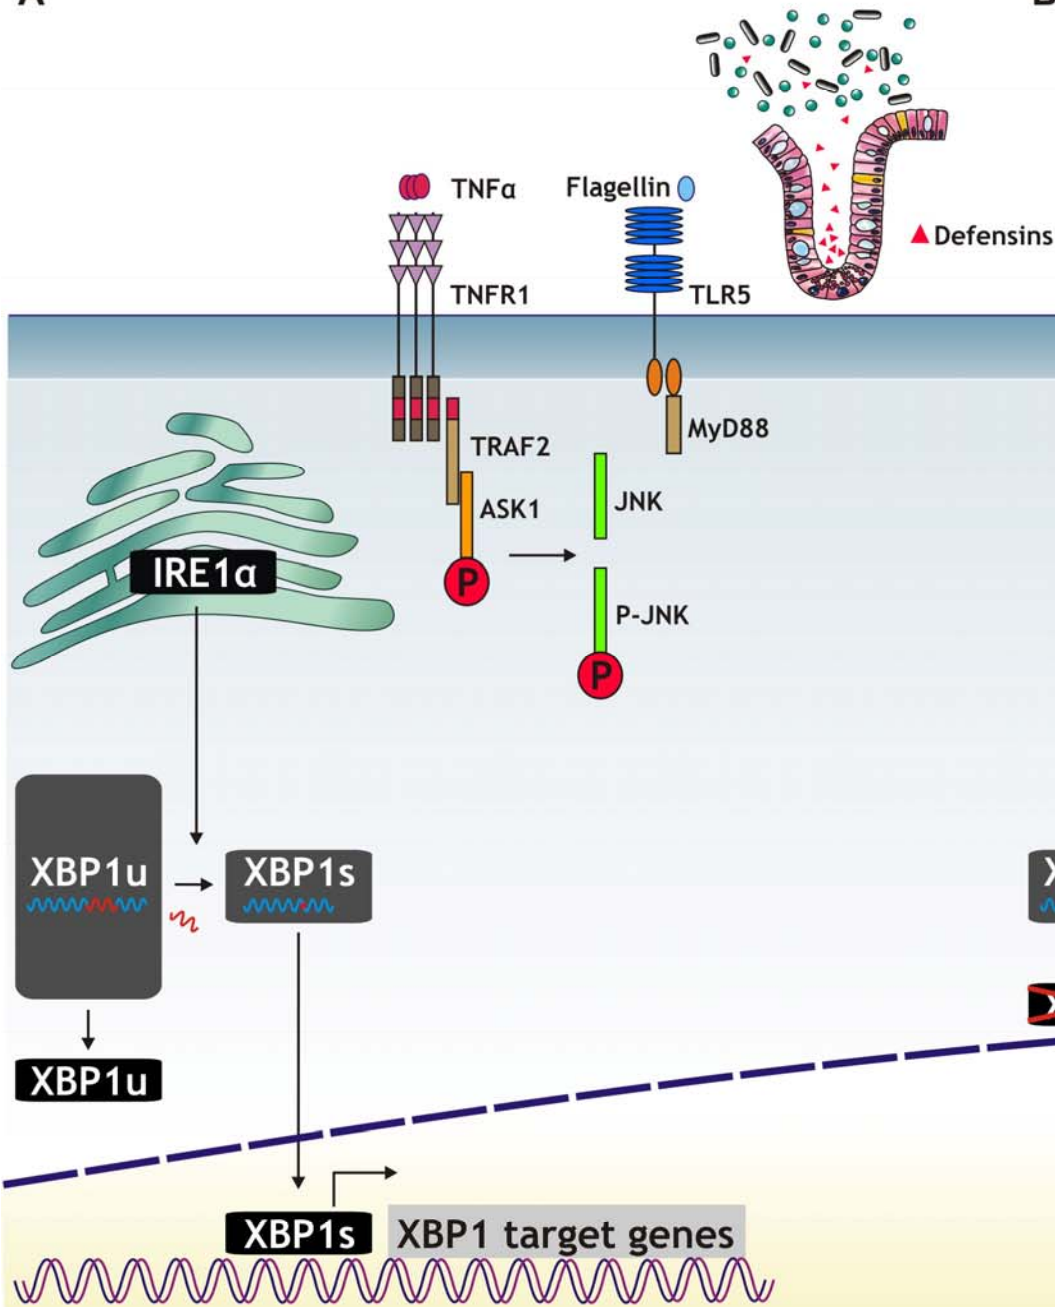

B

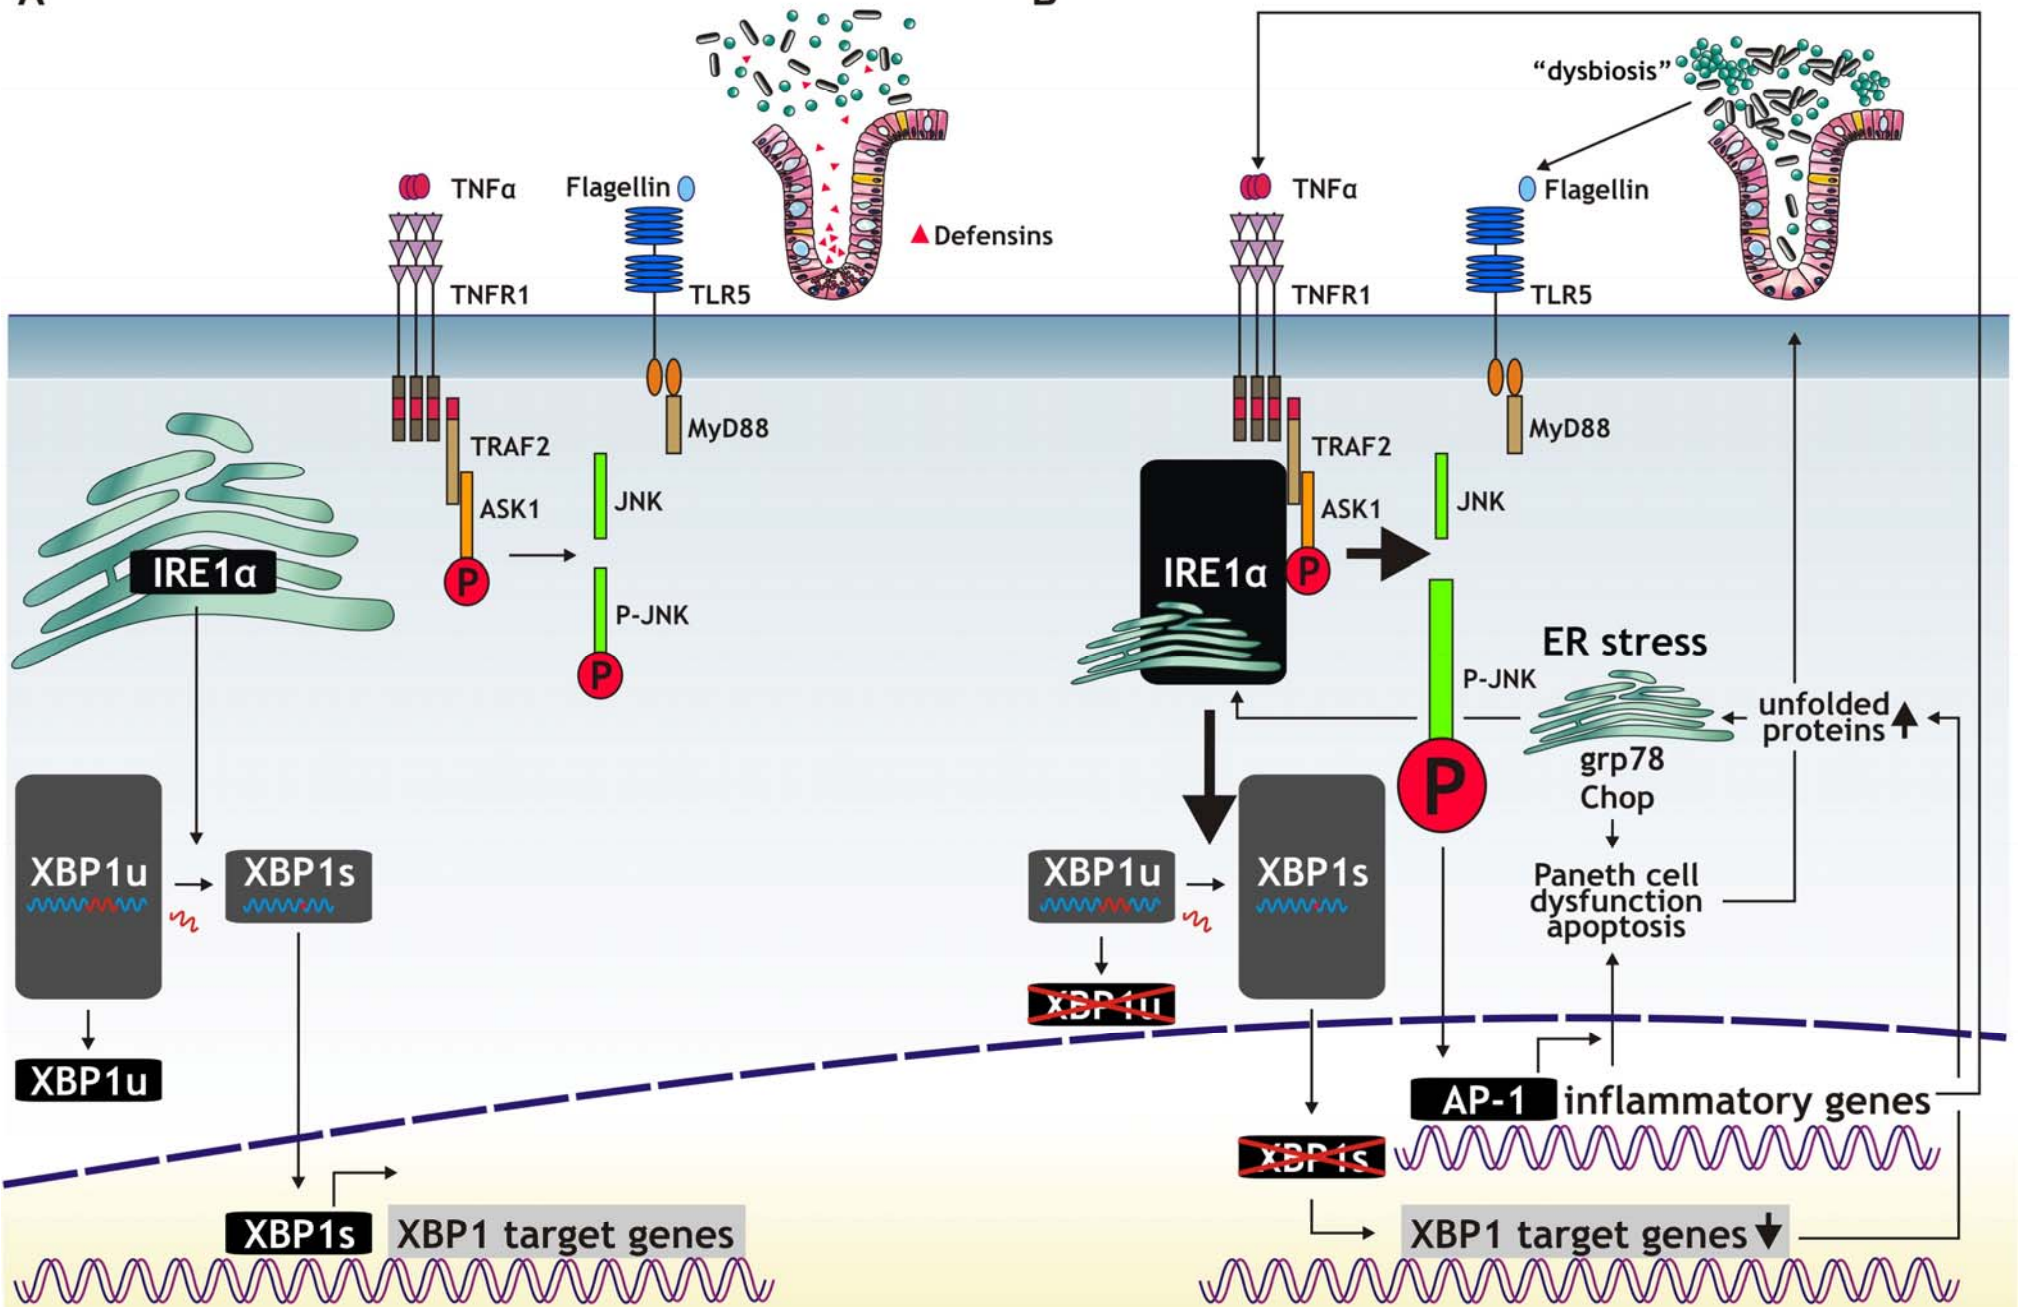

**Table S1. Identification of genes that are differentially expressed in the jejunum of the WT and *Xbp1* knock-out mice.** Genes with more than two fold changes in the expression level are listed. Total RNAs pooled from three animals per group were subjected to DNA chip experiments using Affymetrix mouse 430 Chips. Data was analyzed by GCOS 1.4 software. P, present; A, absent; D, decrease; I, increase; MI, modest increase. NCBI GEO accession number GSE12038.



Supplementary Table 1. Identification of genes that are differentially expressed in the jejunum of the WT and Xbp1 knock-out mice. Genes with more than two fold changes in the expression level are listed. Total RNAs pool from three animals per each group were subjected to DNA chip experiments using Affymetrix mouse 430 Chips. Data was analyzed by GCOS 1.4 software. P, present; A, absent; D, decrease; I, increase; MI, modest increase

| Transcript              | WT     |            | KO     |            | Change KO/WT |      | Gene           |                                                                     |
|-------------------------|--------|------------|--------|------------|--------------|------|----------------|---------------------------------------------------------------------|
|                         | Signal | Detectable | Signal | Detectable | Fold         | Call | Symbol         | Title                                                               |
| <b>Defense response</b> |        |            |        |            |              |      |                |                                                                     |
| NM_183253 //            | 3073   | P          | 4      | A          | 0.00         | D    | 2010016B13     | RIKEN cDNA 2010016B13 gene /// defensin-related cryptidin           |
| NM_007848               | 546    | P          | 2      | A          | 0.00         | D    | Defcr-rs7      | defensin related cryptidin, related sequence 7                      |
| NM_007847               | 695    | P          | 21     | A          | 0.03         | D    | Defcr-rs2      | defensin related cryptidin, related sequence 2                      |
| NM_010039               | 885    | P          | 45     | P          | 0.07         | D    | Defcr4         | defensin related cryptidin 4                                        |
| NM_007851               | 9620   | P          | 385    | P          | 0.07         | D    | Defcr5         | defensin related cryptidin 5                                        |
| NM_00100758             | 4263   | P          | 448    | P          | 0.13         | D    | AY761184       | cDNA sequence AY761184                                              |
| NM_007844               | 6056   | P          | 814    | P          | 0.14         | D    | Defcr-rs1      | defensin related sequence cryptidin peptide (paneth cells)          |
| NM_007845               | 63     | P          | 10     | A          | 0.15         | D    | Defcr-rs10     | defensin related cryptidin, related sequence 10                     |
| NM_013590               | 7914   | P          | 1235   | P          | 0.16         | D    | Lzp-s          | P' lysozyme structural                                              |
| NM_013590               | 8462   | P          | 1516   | P          | 0.22         | D    | Lzp-s          | P' lysozyme structural                                              |
| NM_00101230             | 8656   | P          | 2043   | P          | 0.23         | D    | Defcr12 /// Da | defensin related cryptidin 12 /// defensin related cryptidin 15 /// |
| NM_011046               | 323    | P          | 135    | P          | 0.47         | D    | Furin          | turnin (paired basic amino acid cleaving enzyme)                    |
| NM_177544               | 2343   | P          | 5496   | P          | 2.30         | I    | Ang4           | angiogenin, nonuclease A family, member 4                           |
| NM_008330               | 368    | P          | 1013   | P          | 2.46         | I    | Ifi47          | interferon gamma inducible protein 47                               |
| NM_028071               | 545    | P          | 1356   | P          | 2.46         | I    | Col11          | coactosin-like 1 (Dicyotosturium)                                   |
| NM_177544               | 787    | P          | 1744   | P          | 2.46         | I    | Ang4           | angiogenin, nonuclease A family, member 4                           |
| NM_009684               | 160    | P          | 404    | P          | 2.46         | I    | Apaf1          | apoptotic peptidase activating factor 1                             |
| NM_011541               | 438    | P          | 1119   | P          | 2.83         | I    | Tcea1          | transcription elongation factor A (SII) 1                           |
| NM_011128               | 202    | P          | 606    | P          | 3.03         | I    | Pnrip2         | pancreatic lipase-related protein 2                                 |
| NM_011541               | 157    | P          | 477    | P          | 3.25         | I    | Tcea1          | transcription elongation factor A (SII) 1                           |
| NM_008326               | 188    | P          | 634    | P          | 3.25         | I    | B-cbl linker   | B-cbl linker                                                        |
| NM_008326               | 125    | P          | 367    | P          | 3.73         | I    | Irgm           | immunity-related G1 Pase family, M                                  |
| NM_011128               | 248    | P          | 832    | P          | 3.73         | I    | Pnrip2         | pancreatic lipase-related protein 2                                 |
| NM_010742               | 24     | A          | 124    | P          | 4.29         | I    | Ly6d           | lymphocyte antigen 6 complex, locus D                               |
| <b>Apoptosis</b>        |        |            |        |            |              |      |                |                                                                     |
| XM_00100190             | 7584   | P          | 1266   | P          | 0.16         | D    | Muc2           | mucin 2                                                             |
| NM_020581               | 494    | P          | 148    | P          | 0.20         | D    | Angptl4        | angiopoietin-like 4                                                 |
| NM_011262               | 278    | P          | 605    | P          | 2.14         | I    | Dp2f           | D4, zinc and double PHD fingers family 2                            |
| NM_011801               | 212    | P          | 432    | P          | 2.14         | I    | Cfdp1          | craniofacial development protein 1                                  |
| NM_011585               | 71     | P          | 119    | P          | 2.14         | I    | Tia1           | cytotoxic granule-associated RNA binding protein 1                  |
| NM_023258               | 1965   | P          | 4347   | P          | 2.14         | I    | Pycard         | PYD and CARD domain containing                                      |
| NM_018807               | 101    | P          | 190    | P          | 2.14         | I    | Plagl2         | pleiomorphic adenoma gene-like 2                                    |
| NM_007661               | 967    | P          | 2092   | P          | 2.14         | I    | Cdc21          | cell division cycle 2-like 1                                        |
| NM_053157               | 137    | P          | 325    | P          | 2.14         | MI   | Tm2d1          | TM2 domain containing 1                                             |
| NM_145452               | 239    | P          | 446    | P          | 2.14         | I    | Kasa1          | RAS p21 protein activator 1                                         |
| XM_129668 //            | 66     | P          | 108    | P          | 2.14         | I    | Phpp           | PH domain and leucine rich repeat protein phosphatase               |
| NM_172429               | 151    | P          | 373    | P          | 2.14         | I    | Snncd1         | survival motor neuron domain containing 1                           |
| NM_007983               | 140    | P          | 283    | P          | 2.14         | I    | Fa1            | Fas-associated factor 1                                             |
| NM_026201               | 334    | P          | 767    | P          | 2.14         | I    | Ccar1          | cell division cycle and apoptosis regulator 1                       |
| NM_181582               | 452    | P          | 1030   | P          | 2.14         | I    | Eif5a          | eukaryotic translation initiation factor 5A                         |
| NM_009810               | 1127   | P          | 2239   | P          | 2.14         | I    | Casp3          | caspase 3                                                           |
| NM_009860               | 240    | P          | 619    | P          | 2.14         | I    | Pten           | phosphatase and tensin homolog                                      |
| NM_009009               | 120    | P          | 297    | P          | 2.14         | I    | Rad21          | RAD21 homolog (S. pombe)                                            |
| NM_023229               | 128    | P          | 329    | P          | 2.14         | I    | Fask           | Fas-activated serine/threonine kinase                               |
| NM_134141               | 152    | A          | 403    | M          | 2.30         | I    | Clapin1        | cytokine induced apoptosis inhibitor 1                              |
| NM_144541 //            | 175    | P          | 425    | P          | 2.30         | I    | Bre            | brain and reproductive organ-expressed protein                      |
| NM_198176               | 81     | P          | 183    | P          | 2.30         | I    | C78212         | expressed sequence C78212                                           |
| NM_134138               | 47     | P          | 160    | P          | 2.30         | MI   | Tnfrsf5p1      | tumor necrosis factor superfamily, member 5-induced protein 1       |
| NM_019745               | 245    | P          | 632    | P          | 2.30         | I    | Pdcd10         | programmed cell death 10                                            |
| NM_134011               | 155    | P          | 311    | P          | 2.30         | I    | Tbrg4          | transforming growth factor beta regulated gene 4                    |
| NM_011997               | 85     | P          | 181    | P          | 2.30         | I    | Casp8ap2       | caspase 8 associated protein 2                                      |
| NM_010019               | 118    | P          | 265    | P          | 2.30         | I    | Dapk2          | death-associated kinase 2                                           |
| NM_027404               | 83     | P          | 164    | P          | 2.30         | I    | Bag5           | BCL2-associated athanogene 5                                        |
| NM_029770               | 92     | P          | 237    | P          | 2.30         | I    | Unc5b          | unc-5 homolog B (C. elegans)                                        |
| NM_024239               | 78     | P          | 191    | P          | 2.46         | I    | Stamp          | Stam binding protein                                                |
| NM_009172 //            | 33     | P          | 95     | P          | 2.46         | I    | Siah1a /// Sia | seven in absentia 1A /// seven in absentia 1B                       |
| NM_009860               | 272    | P          | 716    | P          | 2.46         | I    | Pten           | phosphatase and tensin homolog                                      |
| XM_905787 //            | 242    | P          | 681    | P          | 2.46         | MI   | Rnf7           | ring finger protein 7                                               |
| NM_011615               | 115    | P          | 294    | P          | 2.46         | I    | Deaf1          | death effector domain-containing                                    |
| NM_009684               | 160    | P          | 404    | P          | 2.46         | I    | Apaf1          | apoptotic peptidase activating factor 1                             |
| NM_009688               | 167    | P          | 422    | P          | 2.46         | I    | Birc4          | baculoviral IAP repeat-containing 4                                 |
| XM_905787 //            | 181    | P          | 453    | P          | 2.46         | I    | Rnf7           | ring finger protein 7                                               |
| NM_021897               | 222    | P          | 574    | P          | 2.64         | I    | Trp53inp1      | transformation related protein 53 inducible nuclear protein 1       |
| NM_007530               | 39     | P          | 88     | P          | 2.64         | MI   | Bcap29         | B-cell receptor-associated protein 29                               |
| NM_134138               | 37     | P          | 103    | P          | 2.64         | I    | Tnfrsf5p1      | tumor necrosis factor superfamily, member 5-induced protein 1       |
| NM_134111               | 161    | P          | 397    | P          | 2.64         | I    | Tbrg4          | transforming growth factor beta regulated gene 4                    |
| NM_023565               | 97     | P          | 267    | P          | 2.64         | I    | Cgsl1          | chromosome segregation 1-like (S. cerevisiae)                       |
| NM_172422               | 97     | P          | 223    | P          | 2.83         | I    | 2810421124R    | RIKEN cDNA 2810421124 gene                                          |
| NM_009289               | 82     | P          | 254    | P          | 2.83         | I    | Slk            | STE20-like kinase (yeast)                                           |
| NM_178589               | 158    | P          | 418    | P          | 2.83         | I    | Tnfrsf21       | tumor necrosis factor receptor superfamily, member 21               |
| NM_028133               | 118    | P          | 278    | P          | 3.03         | I    | Egln3          | EGL nine homolog 3 (C. elegans)                                     |
| NM_028133               | 353    | P          | 1101   | P          | 3.03         | I    | Egln3          | EGL nine homolog 3 (C. elegans)                                     |
| NM_011955               | 228    | P          | 675    | P          | 3.03         | I    | Ripk3          | receptor-interacting serine-threonine kinase 3                      |
| NM_172422               | 39     | P          | 143    | P          | 3.03         | I    | 2810421124R    | RIKEN cDNA 2810421124 gene                                          |
| NM_007859               | 47     | P          | 84     | P          | 3.25         | I    | Dfb            | DNA fragmentation factor, beta subunit                              |
| NM_0010122              | 96     | P          | 294    | P          | 3.25         | I    | Birc5          | baculoviral IAP repeat-containing 5                                 |
| NM_009810               | 164    | P          | 573    | P          | 3.25         | I    | Casp3          | caspase 3                                                           |
| NM_025380               | 72     | P          | 286    | P          | 3.25         | I    | Eef1e1         | eukaryotic translation elongation factor 1 epsilon 1                |
| NM_023646               | 156    | P          | 516    | P          | 3.25         | I    | Dnaj3          | DnaJ (Hsp40) homolog, subfamily A, member 3                         |
| NM_023646               | 61     | P          | 291    | P          | 4.00         | I    | Dnaj3a         | DnaJ (Hsp40) homolog, subfamily A, member 3                         |
| NM_008234               | 16     | A          | 88     | P          | 4.92         | I    | Helis          | helicase, lymphoid specific                                         |
| <b>Cell cycle</b>       |        |            |        |            |              |      |                |                                                                     |
| NM_007595               | 93     | P          | 4      | A          | 0.06         | D    | Camk2b         | Calcium/calmodulin-dependent protein kinase II, beta                |
| NM_134101               | 693    | P          | 1467   | P          | 2.14         | I    | Psm2           | proteasome (prosome, macropain) 26S subunit, non-ATPase, 2          |

| Transcript   | WT     |            | KO     |            | Change KO/WT |      | Gene           |                                                                                 |
|--------------|--------|------------|--------|------------|--------------|------|----------------|---------------------------------------------------------------------------------|
|              | Signal | Detectable | Signal | Detectable | Fold         | Call | Symbol         | Title                                                                           |
| NM_007661    | 967    | P          | 2092   | P          | 2.14         | I    | Cdc21          | cell division cycle 2-like 1                                                    |
| NM_019750    | 128    | P          | 269    | P          | 2.14         | I    | Nat6           | N-acetyltransferase 6                                                           |
| NM_010237    | 384    | P          | 911    | P          | 2.14         | I    | Frk            | lyn-related kinase                                                              |
| NM_013917    | 188    | P          | 381    | P          | 2.14         | I    | Pttg1          | pituitary tumor-transforming 1                                                  |
| NM_134077    | 54     | P          | 123    | P          | 2.14         | I    | 1700009P03     | RIKEN cDNA 1700009P03 gene                                                      |
| NM_013812    | 249    | A          | 572    | P          | 2.14         | I    | Cdk2ap1        | CDK2 (cyclin-dependent kinase 2)-associated protein 1                           |
| NM_026904    | 96     | P          | 236    | P          | 2.14         | MI   | Anapc10        | anaphase promoting complex subunit 10                                           |
| NM_021535    | 356    | P          | 808    | P          | 2.14         | I    | Smu1           | smu-1 suppressor of mec-8 and unc-52 homolog (C. elegans)                       |
| NM_026201    | 334    | P          | 767    | P          | 2.14         | I    | Ccar1          | cell division cycle and apoptosis regulator 1                                   |
| NM_021465    | 260    | P          | 607    | P          | 2.14         | I    | Slag2          | stromal antigen 2                                                               |
| NM_008960    | 240    | P          | 619    | P          | 2.14         | I    | Plen           | phosphatase and tensin homolog                                                  |
| NM_030732    | 80     | P          | 193    | P          | 2.14         | MI   | Tbl1xr1        | transducin (beta)-like 1X-linked receptor 1                                     |
| NM_029402    | 136    | P          | 266    | P          | 2.14         | I    | Cul2           | culin 2                                                                         |
| XM_0010004   | 71     | P          | 153    | P          | 2.14         | I    | Sbno1          | sno, strawberry notch homolog 1 (Drosophila)                                    |
| NM_133656    | 486    | P          | 1083   | P          | 2.30         | I    | Crk            | v-crk sarcoma virus CT10 oncogene homolog (avian)                               |
| NM_130889    | 266    | P          | 627    | P          | 2.30         | I    | Anp32b         | acidic nuclear phosphoprotein 32 family, member B                               |
| NM_007658    | 379    | P          | 833    | P          | 2.30         | I    | Cdc25a         | cell division cycle 25 homolog A (S. cerevisiae)                                |
| NM_011666    | 307    | P          | 680    | P          | 2.30         | I    | Ube1c          | ubiquitin-activating enzyme E1C                                                 |
| NM_011317    | 90     | P          | 130    | P          | 2.30         | MI   | Khrbs1         | KH domain containing, RNA binding, signal transduction associated 1             |
| NM_009870 // | 90     | P          | 231    | P          | 2.30         | I    | Cdk4 /// LOC   | cyclin-dependent kinase 4 /// similar to Cell division protein kinase 4 (Cyclin |
| NM_009870 // | 90     | P          | 276    | P          | 2.30         | I    | Cdk4           | cyclin-dependent kinase 4                                                       |
| NM_011808    | 113    | P          | 248    | P          | 2.30         | I    | Dmrt1          | cyclin D binding myb-like transcription factor 1                                |
| NM_009361 // | 180    | P          | 435    | P          | 2.30         | I    | Tfdp1 /// LOC  | transcription factor Dp 1 /// similar to Transcription factor Dp-1 (E2F dimer   |
| NM_027357    | 180    | P          | 956    | P          | 2.30         | I    | Fsm1           | proteasome (prosome, macropain) 26S subunit, non-ATPase, 1                      |
| NM_011666    | 428    | P          | 735    | P          | 2.30         | I    | Ube1c          | ubiquitin-activating enzyme E1C                                                 |
| NM_008224    | 138    | P          | 302    | P          | 2.30         | I    | Hcfc1          | host cell factor C1                                                             |
| NM_139269    | 643    | P          | 1591   | P          | 2.30         | I    | Hras1c3        | HRAS like suppressor 3                                                          |
| NM_134138    | 47     | P          | 160    | P          | 2.30         | MI   | Tnfrsf5p1      | tumor necrosis factor superfamily, member 5-induced protein 1                   |
| NM_009974    | 170    | P          | 369    | P          | 2.30         | I    | Csnk2a2        | casein kinase II, alpha 2, polypeptide                                          |
| NM_013715    | 283    | P          | 950    | P          | 2.30         | I    | Cops5          | COP9 (constitutive photomorphogenic) homolog, subunit 5 (Arabidopsis th         |
| NM_153599 // | 392    | P          | 586    | P          | 2.30         | I    | Cdk8           | cyclin-dependent kinase 8                                                       |
| NM_134155    | 105    | P          | 254    | P          | 2.46         | I    | Brms1          | breast cancer metastasis-suppressor 1                                           |
| NM_009172 // | 33     | P          | 95     | P          | 2.46         | I    | Siah1a /// Sia | seven in absentia 1A /// seven in absentia 1B                                   |
| NM_010948 // | 213    | P          | 542    | P          | 2.46         | I    | Nudc /// Nudc  | nuclear distribution gene C homolog (Aspergillus) /// nuclear distribution gene |
| NM_009870 // | 43     | P          | 141    | P          | 2.46         | I    | Cdk4 /// LOC   | cyclin-dependent kinase 4 /// similar to Cell division protein kinase 4 (Cyclin |
| NM_008960    | 272    | P          | 716    | P          | 2.46         | I    | Plen           | phosphatase and tensin homolog                                                  |
| NM_009791    | 19     | A          | 53     | P          | 2.46         | I    | Aspm           | asp (abnormal spindle)-like, microcephaly associated (Drosophila)               |
| NM_146171    | 36     | P          | 102    | P          | 2.46         | I    | 2810406C15     | RIKEN cDNA 2810406C15 gene                                                      |
| NM_009668    | 87     | P          | 175    | P          | 2.46         | I    | Bin1           | bridging integrator 1                                                           |
| NM_145991    | 202    | P          | 509    | P          | 2.46         | I    | Cdc73          | Vcell division cycle 73, Paf1/RNA polymerase II complex component, hom          |
| NM_011903    | 69     | P          | 164    | P          | 2.46         | I    | Tlk2           | tousled-like kinase 2 (Arabidopsis)                                             |
| NM_011666    | 289    | P          | 728    | P          | 2.46         | I    | Ube1c          | ubiquitin-activating enzyme E1C                                                 |
| NM_013812    | 196    | P          | 550    | P          | 2.46         | I    | Cdk2ap1        | CDK2 (cyclin-dependent kinase 2)-associated protein 1                           |
| NM_009391 // | 734    | P          | 1658   | P          | 2.46         | I    | Ran /// LOC6   | RAN, member RAS oncogene family /// similar to RAN, member RAS onc              |
| NM_172301    | 35     | P          | 149    | P          | 2.46         | I    | Ccnb1-rs1 ///  | cyclin B1, related sequence 1 /// cyclin B1</                                   |

| Transcript                       | WT     |            | KO     |            | Change KO/WT |      | Gene                  |                                                                                |
|----------------------------------|--------|------------|--------|------------|--------------|------|-----------------------|--------------------------------------------------------------------------------|
|                                  | Signal | Detectable | Signal | Detectable | Fold         | Call | Symbol                | Title                                                                          |
| NM_007900                        | 19     | P          | 84     | P          | 3.73         | I    | Ect2                  | ect2 oncogene                                                                  |
| NM_145150                        | 46     | P          | 182    | P          | 3.73         | I    | Prc1                  | protein regulator of cytokinesis 1                                             |
| NM_011496                        | 19     | A          | 70     | P          | 3.73         | I    | Aurkb                 | aurora kinase B                                                                |
| NM_173667                        | 32     | P          | 127    | P          | 3.73         | I    | Rcc2                  | regulator of chromosome condensation 2                                         |
| NM_026785                        | 112    | P          | 575    | P          | 3.73         | I    | Ube2c                 | ubiquitin-conjugating enzyme E2C                                               |
| NM_009828                        | 50     | P          | 213    | P          | 4.00         | I    | Ccn2a                 | cyclin A2                                                                      |
| NM_007659                        | 65     | P          | 223    | P          | 4.00         | I    | Cdc2a                 | cell division cycle 2 homolog A (S. pombe)                                     |
| NM_010648                        | 35     | P          | 98     | P          | 4.59         | I    | Myb                   | myeloblastosis oncogene                                                        |
| NM_129301                        | 23     | P          | 113    | P          | 4.92         | I    | Ccnb1-rs1             | cyclin B1, related sequence 1 /// cyclin B1 /// similar to G2/mitotic-specific |
| NM_007850                        | 76     | P          | 385    | P          | 4.92         | I    | Ereg                  | epiregulin                                                                     |
| NM_010892                        | 27     | A          | 146    | P          | 4.92         | I    | Nkx2                  | NIMA (never in mitosis gene a)-related expressed kinase 2                      |
| NM_009828                        | 48     | P          | 224    | P          | 5.28         | I    | Ccn2                  | cyclin A2                                                                      |
| NM_012025                        | 8      | P          | 51     | P          | 5.28         | I    | Racgap1               | Rac G1Pase-activating protein 1                                                |
| NM_172839                        | 20     | A          | 98     | P          | 5.28         | I    | Ccnj                  | cyclin J                                                                       |
| NM_010848                        | 11     | A          | 69     | P          | 7.46         | I    | Myb                   | myeloblastosis oncogene                                                        |
| NM_007837                        | 143    | P          | 1258   | P          | 9.19         | I    | Ddit3                 | DNA-damage inducible transcript 3                                              |
| NM_030693                        | 35     | P          | 1136   | P          | 24.25        | I    | Atf5                  | activating transcription factor 5                                              |
| NM_010633                        | 1      | A          | 51     | P          | 48.50        | I    | Uhmk1                 | UZF homolog motif (UHM) kinase 1 /// similar to U2AF homology motif            |
| <b>Unfolded protein response</b> |        |            |        |            |              |      |                       |                                                                                |
| NM_007837                        | 143    | P          | 1258   | P          | 9.19         | I    | Ddit3                 | DNA-damage inducible transcript 3                                              |
| NM_011631                        | 539    | P          | 2755   | P          | 5.66         | I    | Hsp90b1               | heat shock protein 90kDa beta (Grp94), member 1                                |
| NM_022310                        | 1227   | P          | 5977   | P          | 4.29         | I    | Hsp85a                | heat shock 70kD protein 5 (glucose-regulated protein)                          |
| NM_015774                        | 349    | P          | 1509   | P          | 4.29         | I    | Ero1f                 | ERO1-like (S. cerevisiae)                                                      |
| NM_015774                        | 152    | P          | 624    | P          | 4.29         | I    | Ero1l                 | ERO1-like (S. cerevisiae)                                                      |
| NM_015774                        | 314    | P          | 1193   | P          | 3.73         | I    | Ero1i                 | ERO1-like (S. cerevisiae)                                                      |
| NM_022310                        | 2292   | P          | 8868   | P          | 3.48         | I    | Hsp85a                | heat shock 70kD protein 5 (glucose-regulated protein)                          |
| NM_011631                        | 1488   | P          | 4738   | P          | 3.03         | I    | Hsp90b1               | heat shock protein 90kDa beta (Grp94), member 1                                |
| NM_009716                        | 245    | P          | 618    | P          | 2.64         | I    | Atf4                  | activating transcription factor 4                                              |
| NM_021305                        | 30     | P          | 86     | P          | 2.46         | I    | Sec61a2               | Sec61, alpha subunit 2 (S. cerevisiae)                                         |
| NM_023913                        | 175    | P          | 397    | P          | 2.30         | I    | Ern1                  | Endoplasmic reticulum (ER) to nucleus signalling 1                             |
| NM_138585                        | 70     | P          | 190    | P          | 2.30         | I    | Cherp                 | calcium homeostasis endoplasmic reticulum protein                              |
| NM_029103                        | 1123   | P          | 2907   | P          | 2.30         | I    | Armet                 | arginine-rich, mutated in early stage tumors                                   |
| NM_009716                        | 1475   | P          | 2986   | P          | 2.14         | I    | Atf4                  | activating transcription factor 4                                              |
| <b>Others</b>                    |        |            |        |            |              |      |                       |                                                                                |
| XM_130038                        | 1547   | P          | 146    | P          | 0.08         | D    | Cubn                  | cubilin (intrinsic factor-cobalamin receptor)                                  |
| NM_130038                        | 2738   | P          | 218    | P          | 0.08         | D    | Cubn                  | cubilin (intrinsic factor-cobalamin receptor)                                  |
| NM_010584                        | 1962   | P          | 211    | P          | 0.11         | D    | Itlna                 | intelectin a                                                                   |
| XM_485660                        | 64     | P          | 7      | A          | 0.13         | D    | Plgg                  | phosphatidylinositol glycan, class G                                           |
| NM_145424                        | 70     | P          | 11     | A          | 0.13         | D    | BC089597              | cDNA sequence BC089597                                                         |
| NM_013743                        | 249    | P          | 40     | P          | 0.15         | D    | Pdk4                  | pyruvate dehydrogenase kinase, isoenzyme 4                                     |
| NM_00100954                      | 8015   | P          | 1394   | P          | 0.15         | D    | Naalad1               | N-acetylated alpha-linked acidic dipeptidase-like 1                            |
| NM_010776                        | 87     | P          | 10     | A          | 0.19         | D    | Mbl2                  | mannose binding lectin (C)                                                     |
| ---                              | 71     | P          | 29     | P          | 0.19         | D    | ---                   | ---                                                                            |
| NM_007472                        | 1105   | P          | 245    | P          | 0.20         | D    | Aqp1                  | aquaporin 1                                                                    |
| NM_026384                        | 1768   | P          | 327    | P          | 0.20         | D    | Dgat2                 | diacylglycerol O-acyltransferase 2                                             |
| XM_973716                        | 1017   | P          | 167    | P          | 0.20         | D    | LOC664968             | hypothetical protein LOC664968 /// hypothetical protein LOC669211 ///          |
| NM_026384                        | 2267   | P          | 576    | P          | 0.22         | D    | Dgat2                 | diacylglycerol O-acyltransferase 2                                             |
| NM_133213                        | 1124   | P          | 236    | P          | 0.23         | D    | Xpnp2                 | X-prolyl aminopeptidase (aminopeptidase P) 2, membrane-bound                   |
| NM_134072                        | 118    | P          | 25     | P          | 0.25         | D    | Akr1c14               | aldo-keto reductase family 1, member C14                                       |
| NM_026701                        | 62     | P          | 5      | A          | 0.25         | D    | RIKEN cDNA 0610038K03 | RIKEN cDNA 0610038K03 gene                                                     |
| NM_133970                        | 302    | P          | 80     | A          | 0.25         | D    | D8Ertd354e            | DNA segment, Chr 8, ERATO D0i 354, expressed                                   |
| NM_011576                        | 51     | P          | 10     | A          | 0.25         | D    | Tfpi                  | tissue factor pathway inhibitor                                                |
| NM_00103955                      | 732    | P          | 177    | P          | 0.27         | D    | 9030012A22            | RIKEN cDNA 9030012A22 gene                                                     |
| NM_0265017                       | 333    | P          | 83     | P          | 0.27         | D    | 1300010M03            | RIKEN cDNA 1300010M03 gene                                                     |
| NM_144930                        | 149    | P          | 28     | P          | 0.27         | D    | AU018778              | expressed sequence AU018778                                                    |
| XM_620178                        | 2087   | P          | 562    | P          | 0.27         | D    | PIb1                  | phospholipase B1 /// cDNA sequence BC033606 /// similar to phospholipase B1    |
| NM_146117                        | 268    | P          | 65     | P          | 0.27         | D    | BC004853              | cDNA sequence BC004853                                                         |
| NM_026159                        | 641    | P          | 220    | P          | 0.31         | D    | Reisat                | retinol saturase (all trans retinol 13,14 reductase)                           |
| NM_017473                        | 1119   | P          | 395    | P          | 0.31         | D    | Rdh7                  | retinol dehydrogenase 7                                                        |
| ---                              | 90     | P          | 32     | A          | 0.31         | D    | ---                   | ---                                                                            |
| NM_019821                        | 375    | P          | 110    | P          | 0.33         | D    | Gas6                  | growth arrest specific 6                                                       |
| NM_011213                        | 1028   | P          | 403    | P          | 0.33         | D    | Ptprf                 | protein tyrosine phosphatase, receptor type, F                                 |
| NM_023219                        | 818    | P          | 339    | P          | 0.33         | D    | Slc5a4b               | solute carrier family 5 (neutral amino acid transporters, system A), member 4  |
| ---                              | 65     | P          | 14     | P          | 0.33         | D    | ---                   | ---                                                                            |
| NM_028094                        | 779    | P          | 288    | P          | 0.33         | D    | Ugt2a3                | UDP-glucuronosyltransferase 2 family, polypeptide A3                           |
| NM_010894                        | 4503   | P          | 1489   | P          | 0.35         | D    | Lamp1                 | lysosomal membrane glycoprotein 1                                              |
| NM_009856                        | 68     | P          | 28     | A          | 0.35         | D    | CD83                  | CD83 antigen                                                                   |
| NM_146149                        | 901    | P          | 310    | P          | 0.35         | D    | BC026682              | cDNA sequence BC026682                                                         |
| NM_007815                        | 83     | P          | 28     | P          | 0.35         | D    | Cyp2c29               | cytochrome P450, family 2, subfamily c, polypeptide 29                         |
| NM_016960                        | 633    | P          | 236    | P          | 0.35         | D    | Ccl20                 | chemokine (C-C motif) ligand 20                                                |
| NM_00100144                      | 55     | P          | 16     | P          | 0.35         | D    | Cyp2c44               | cytochrome P450, family 2, subfamily c, polypeptide 44                         |
| NM_027890                        | 1105   | P          | 342    | P          | 0.35         | D    | Susd2                 | sushi domain containing 2                                                      |
| ---                              | 89     | P          | 44     | M          | 0.35         | D    | ---                   | Transcribed locus                                                              |
| ---                              | 67     | P          | 24     | P          | 0.35         | D    | 9130221J18            | RIKEN cDNA 9130221J18 gene                                                     |
| NM_011213                        | 2391   | P          | 871    | P          | 0.38         | D    | Ptprf                 | protein tyrosine phosphatase, receptor type, F                                 |
| NM_015740                        | 399    | P          | 182    | P          | 0.38         | D    | Bloc1s1               | biogenesis of lysosome-related organelles complex-1, subunit 1                 |
| NM_145435                        | 285    | P          | 128    | A          | 0.38         | D    | Ppy                   | type YY                                                                        |
| ---                              | 149    | P          | 63     | A          | 0.38         | D    | ---                   | ---                                                                            |
| NM_177380                        | 76     | P          | 27     | A          | 0.38         | D    | Cyp3a44               | cytochrome P450, family 3, subfamily a, polypeptide 44                         |
| XM_00100116                      | 302    | P          | 110    | P          | 0.38         | D    | Stim2                 | stromal interaction molecule 2                                                 |
| NM_031843                        | 50     | P          | 16     | A          | 0.38         | D    | Dpp7                  | dipeptidylpeptidase 7                                                          |
| NM_031843                        | 114    | P          | 49     | P          | 0.38         | D    | Dpp7                  | dipeptidylpeptidase 7                                                          |
| NM_019577                        | 85     | P          | 46     | A          | 0.38         | D    | Ccl24                 | chemokine (C-C motif) ligand 24                                                |
| NM_008585                        | 2431   | P          | 964    | P          | 0.38         | D    | Mep1a                 | mephrin 1 alpha                                                                |
| NM_028841                        | 92     | P          | 37     | A          | 0.38         | D    | Tspan17               | tetraspanin 17                                                                 |
| NM_007860                        | 1349   | P          | 675    | P          | 0.41         | D    | Dio1                  | deiodinase, iodothyronine, type 1                                              |

| Transcript | WT     |            | KO     |            | Change KO/WT |      | Gene       |                                                                              |
|------------|--------|------------|--------|------------|--------------|------|------------|------------------------------------------------------------------------------|
|            | Signal | Detectable | Signal | Detectable | Fold         | Call | Symbol     | Title                                                                        |
| NM_019447  | 225    | P          | 90     | P          | 0.41         | D    | Hgfac      | hepatocyte growth factor activator                                           |
| NM_011213  | 2224   | P          | 861    | P          | 0.41         | D    | Ptprf      | protein tyrosine phosphatase, receptor type, F                               |
| NM_0010348 | 960    | P          | 470    | P          | 0.41         | D    | 1810015C04 | RIKEN cDNA 1810015C04 gene                                                   |
| NM_0010335 | 238    | P          | 84     | P          | 0.41         | D    | Kcnk6      | potassium inwardly-rectifying channel, subfamily K, member 6                 |
| NM_0010348 | 278    | P          | 98     | P          | 0.41         | D    | 1810015C04 | RIKEN cDNA 1810015C04 gene                                                   |
| XM_131138  | 181    | P          | 55     | P          | 0.41         | D    | Gm131      | gene model 131, (NCBI) /// similar to prochymosin                            |
| NM_024264  | 1133   | P          | 487    | P          | 0.44         | D    | Cyp27a1    | cytochrome P450, family 27, subfamily a, polypeptide 1                       |
| NM_033603  | 2596   | P          | 1158   | P          | 0.44         | D    | Armn       | armonios                                                                     |
| NM_026193  | 317    | P          | 145    | P          | 0.44         | D    | 1300013J15 | RIKEN cDNA 1300013J15 gene                                                   |
| NM_028749  | 781    | P          | 401    | P          | 0.44         | D    | Npl        | N-acetylneuraminase pyruvate lyase                                           |
| NM_003755  | 107    | P          | 46     | A          | 0.44         | D    | Bmp1       | bone morphogenetic protein 1                                                 |
| NM_008124  | 278    | P          | 119    | P          | 0.44         | D    | Gp131      | gap junction membrane channel protein beta 1                                 |
| NM_021486  | 101    | P          | 41     | P          | 0.44         | D    | Bcmo1      | beta-carotene 15,15'-monooxygenase                                           |
| ---        | 177    | P          | 74     | P          | 0.44         | D    | ---        | ---                                                                          |
| NM_010220  | 739    | P          | 356    | P          | 0.47         | D    | Fkbp5      | FK506 binding protein 5                                                      |
| NM_009899  | 198    | P          | 83     | P          | 0.47         | D    | Cla1       | chloride channel calcium activated 1                                         |
| NM_021274  | 79     | P          | 28     | A          | 0.47         | D    | Cxcl10     | chemokine (C-X-C motif) ligand 10                                            |
| NM_009467  | 101    | P          | 29     | P          | 0.47         | D    | Ugt2b5     | UDP-glucuronosyltransferase 2 family, polypeptide B5                         |
| NM_008013  | 228    | P          | 116    | P          | 0.47         | D    | Fgl2       | fibrinogen-like protein 2                                                    |
| NM_147776  | 383    | P          | 172    | P          | 0.47         | D    | Vwa1       | von Willebrand factor A domain containing 1                                  |
| ---        | 114    | P          | 70     | P          | 0.47         | D    | ---        | 0 day neonate lung cDNA, RIKEN full-length enriched library, clone:E0300     |
| NM_008585  | 1683   | P          | 802    | P          | 0.47         | D    | Mep1a      | mephrin 1 alpha                                                              |
| NM_010220  | 285    | P          | 125    | P          | 0.47         | D    | Fkbp5      | FK506 binding protein 5                                                      |
| NM_146131  | 177    | P          | 109    | P          | 0.47         | D    | Pbxp1      | pre-B-cell leukemia transcription factor interacting protein 1               |
| NM_010284  | 63     | P          | 33     | P          | 0.47         | D    | Ghr        | growth hormone receptor                                                      |
| NM_008707  | 896    | P          | 1447   | P          | 2.14         | I    | Nmt1       | N-myristoyltransferase 1                                                     |
| NM_007862  | 311    | P          | 607    | P          | 2.14         | I    | Dlgh1      | discs, large homolog 1 (Drosophila)                                          |
| NM_021523  | 223    | P          | 465    | P          | 2.14         | I    | Huwei1     | HECT, UBA and WWE domain containing 1                                        |
| XM_898905  | 120    | P          | 856    | P          | 2.14         | I    | 1110019J04 | RIKEN cDNA 1110019J04 gene                                                   |
| NM_026268  | 407    | P          | 2487   | P          | 2.14         | I    | Dusp6      | dual specificity phosphatase 6                                               |
| NM_013507  | 1813   | P          | 8372   | P          | 2.14         | I    | Eif4g2     | eukaryotic translation initiation factor 4, gamma 2                          |
| NM_007563  | 373    | P          | 3823   | P          | 2.14         | I    | Bpgm       | 2,3-bisphosphoglycerate mutase                                               |
| NM_013494  | 132    | P          | 391    | P          | 2.14         | I    | Cpe        | carboxypeptidase E                                                           |
| NM_008568  | 87     | P          | 217    | P          | 2.14         | I    | Mcm7       | minichromosome maintenance deficient 7 (S. cerevisiae)                       |
| ---        | 115    | P          | 270    | P          | 2.14         | I    | ---        | ---                                                                          |
| NM_011418  | 159    | P          | 350    | P          | 2.14         | I    | Smarcb1    | SWI/SNF related, matrix associated, actin dependent regulator of chromatin   |
| NM_053092  | 300    | P          | 689    | P          | 2.14         | I    | Kars       | lysyl-tRNA synthetase /// similar to lysyl-tRNA synthetase                   |
| NM_019703  | 2146   | P          | 4637   | P          | 2.14         | I    | Pfkp       | phosphofructokinase, platelet                                                |
| NM_025860  | 43     | P          | 115    | P          | 2.14         | I    | Ddx18      | DEAD (Asp-Glu-Ala-Asp) box polypeptide 18                                    |
| NM_009551  | 641    | P          | 1531   | P          | 2.14         | I    | Za20d2     | zinc finger, A20 domain containing 2                                         |
| NM_018749  | 446    | P          | 930    | P          | 2.14         | I    | Eif3s7     | eukaryotic translation initiation factor 3, subunit 7 (zeta)                 |
| NM_011899  | 539    | P          | 1142   | P          | 2.14         | I    | Srp54      | signal recognition particle 54 /// similar to signal recognition particle 54 |
| NM_018758  | 361    | P          | 720    | P          | 2.14         | I    | Apba3      | amyloid beta (A4) precursor protein-binding, family A, member 3              |
| NM_010256  | 32     | A          | 83     | P          | 2.14         | I    | Gart       | phosphoribosylglycinamide formyltransferase                                  |
| NM_015729  | 1333   | P          | 2848   | P          | 2.14         | I    | Acox1      | acyl-Coenzyme A oxidase 1, palmitoyl                                         |
| NM_016739  | 1204   | P          | 2579   | P          | 2.14         | I    | Gpiap1     | GPI-anchored membrane protein 1                                              |
| NM_016897  | 821    | P          | 1702   | P          | 2.14         | I    | Timm23     | translocase of inner mitochondrial membrane 23 homolog (yeast)               |
| NM_007926  | 480    | P          | 1065   | P          | 2.14         | I    | Scy1       | small inducible cytokine subfamily E, member 1                               |
| NM_009722  | 161    | P          | 351    | P          | 2.14         | I    | Atp2a2     | ATPase, Ca++ transporting, cardiac muscle, slow twitch 2                     |
| NM_019685  | 28     | P          | 70     | P          | 2.14         | I    | Ruvb1      | RuvB-like protein 1                                                          |
| NM_026635  | 845    | P          | 1842   | P          | 2.14         | I    | 5730536A07 | RIKEN cDNA 5730536A07 gene                                                   |
| NM_011504  | 722    | P          | 1421   | P          | 2.14         | I    | Sitx3p3a   | synaptaxin binding protein 3A                                                |
| NM_009940  | 469    | P          | 798    | P          | 2.14         | I    | Coq7       | demethyl-Q 7                                                                 |
| NM_026124  | 1345   | P          | 3054   | P          | 2.14         | I    | 1110008F13 | RIKEN cDNA 1110008F13 gene                                                   |
| NM_026499  | 178    | P          | 371    | P          | 2.14         | I    | Srsf6      | splicing factor, arginine/serine-rich 6                                      |
| NM_021537  | 556    | P          | 1275   | P          | 2.14         | I    | Slk25      | serine/threonine kinase 25 (yeast)                                           |
| NM_009311  | 83     | P          | 213    | P          | 2.14         | Ml   | Tac1       | tachykinin 1                                                                 |
| NM_026438  | 2957   | P          | 6475   | P          | 2.14         | I    | Ppa1       | pyrophosphatase (inorganic) 1                                                |
| NM_023721  | 445    | P          | 881    | P          | 2.14         | I    | Atp6v1d    | ATPase, H+ transporting, lysosomal V1 subunit D                              |
| NM_026658  | 29     | P          | 89     | P          | 2.14         | I    | Mitf       | mitochondrial translation optimization 1 homolog (S. cerevisiae)             |
| NM_0010123 | 247    | P          | 521    | P          | 2.14         | I    | Zfp238     | zinc finger protein 238                                                      |
| NM_010711  | 782    | P          | 1563   | P          | 2.14         | I    | Fsmb3      | proteasome (prosome, macropain) subunit, beta type 3                         |
| NM_022023  |        |            |        |            |              |      |            |                                                                              |

| Transcript   | WT     |          | KO     |          | Change KO/WT |      | Symbol                                                              | Title                                                                         | Gene |
|--------------|--------|----------|--------|----------|--------------|------|---------------------------------------------------------------------|-------------------------------------------------------------------------------|------|
|              | Signal | Detectio | Signal | Detectio | Fold         | Call |                                                                     |                                                                               |      |
| NM_031179    | 296    | P        | 628    | P        | 2.14         | I    | Sf3b1                                                               | splicing factor 3b, subunit 1                                                 |      |
| NM_026023    | 229    | P        | 407    | P        | 2.14         | I    | Nudcd2                                                              | Nudc domain containing 2                                                      |      |
| ---          | 416    | P        | 812    | P        | 2.14         | I    | ---                                                                 | ---                                                                           |      |
| NM_016884 // | 186    | P        | 387    | P        | 2.14         | I    | Hnrpc // LOC                                                        | heterogeneous nuclear ribonucleoprotein C // similar to heterogeneous         |      |
| NM_011794    | 1053   | P        | 2298   | P        | 2.14         | I    | Bpnt1                                                               | bisphosphate 3'-nucleotidase 1                                                |      |
| NM_025585    | 357    | P        | 741    | P        | 2.14         | I    | R1KEN.CDNA.2410004B18                                               | RIKEN cDNA 2410004B18 gene                                                    |      |
| NM_133188    | 240    | P        | 473    | P        | 2.14         | I    | Dazap1                                                              | DAZ associated protein 1                                                      |      |
| NM_133669    | 124    | P        | 264    | P        | 2.14         | I    | Rp2h                                                                | retinitis pigmentosa 2 homolog (human)                                        |      |
| NM_145510    | 181    | P        | 383    | P        | 2.14         | I    | Rabir1                                                              | RAB interacting factor                                                        |      |
| NM_016806 // | 1092   | P        | 2492   | P        | 2.14         | I    | Hnrpa2b1                                                            | heterogeneous nuclear ribonucleoprotein A2/B1                                 |      |
| NM_029503    | 117    | P        | 273    | P        | 2.14         | I    | Dendr                                                               | density-regulated protein                                                     |      |
| NM_007548    | 158    | P        | 332    | P        | 2.14         | I    | Prdm1                                                               | PK domain containing 1, with ZNF domain                                       |      |
| NM_008102    | 700    | P        | 1446   | P        | 2.14         | I    | Gch1                                                                | GTP cyclohydrolase 1                                                          |      |
| NM_020575    | 720    | P        | 1338   | P        | 2.14         | I    | 38783                                                               | membrane-associated ring finger (C3HC4) 7                                     |      |
| NM_008989    | 322    | P        | 724    | P        | 2.14         | I    | Pura                                                                | purine rich element binding protein A                                         |      |
| NM_030250    | 166    | P        | 358    | P        | 2.14         | MI   | D10Ert438e                                                          | DNA segment, Chr 10, ERA10 Dcl 438, expressed                                 |      |
| NM_011146    | 66     | A        | 120    | P        | 2.14         | I    | Pparg                                                               | peroxisome proliferator activated receptor gamma                              |      |
| NM_011225 // | 279    | P        | 601    | P        | 2.14         | I    | Rab18                                                               | RAB18, member RAS oncogene family                                             |      |
| NM_029556    | 64     | P        | 143    | P        | 2.14         | I    | Cybl                                                                | citrate lyase beta like                                                       |      |
| NM_0010382   | 506    | P        | 1125   | P        | 2.14         | I    | Banf1                                                               | barrier to autointegration factor 1                                           |      |
| NM_013631    | 519    | P        | 1125   | P        | 2.14         | I    | Pklr                                                                | pyruvate kinase liver and red blood cell                                      |      |
| NM_009418    | 71     | P        | 110    | P        | 2.14         | I    | Tpp2                                                                | tripeptidyl peptidase II                                                      |      |
| NM_008917    | 280    | P        | 583    | P        | 2.14         | I    | Pp1l                                                                | palmitoyl-protein thioesterase 1                                              |      |
| NM_007757    | 58     | P        | 115    | P        | 2.14         | MI   | Cpox                                                                | coproporphyrinogen oxidase                                                    |      |
| NM_008775    | 84     | P        | 181    | P        | 2.14         | I    | Plah1b2                                                             | platelet-activating factor acetylhydrolase, isoform 1b, alpha2 subunit        |      |
| NM_019402    | 2346   | P        | 4169   | P        | 2.14         | I    | Pabpn1                                                              | poly(A) binding protein, nuclear 1                                            |      |
| NM_019797    | 84     | P        | 155    | P        | 2.14         | I    | Tnp4                                                                | thyroid hormone receptor interactor 4                                         |      |
| NM_009010    | 50     | P        | 149    | P        | 2.14         | I    | Rad23a                                                              | RAD23a homolog (S. cerevisiae)                                                |      |
| NM_023764    | 227    | P        | 438    | P        | 2.14         | I    | Tollp                                                               | tol interacting protein                                                       |      |
| NM_007479    | 1246   | P        | 2758   | P        | 2.14         | I    | Arf4                                                                | ADP-ribosylation factor 4                                                     |      |
| NM_016858    | 217    | P        | 424    | P        | 2.14         | I    | Rab33b                                                              | RAB33B, member of RAS oncogene family                                         |      |
| NM_020520    | 356    | P        | 802    | P        | 2.14         | I    | Sic25a20                                                            | solute carrier family 25 (mitochondrial carnitine/acylcarnitine translocase)  |      |
| NM_019425    | 141    | P        | 288    | P        | 2.14         | I    | Gnpat1                                                              | glucosamine-phosphate N-acetyltransferase 1                                   |      |
| NM_026455    | 299    | P        | 584    | P        | 2.14         | I    | B51004919R                                                          | RIKEN cDNA 251004919 gene                                                     |      |
| NM_019737 // | 338    | P        | 804    | P        | 2.14         | I    | UDP-Gal:betaGlcNAc beta 1,4-galactosyltransferase, polypeptide 6 // | UDP-Gal:betaGlcNAc beta 1,4-galactosyltransferase, polypeptide 6 //           |      |
| NM_010799    | 411    | P        | 855    | P        | 2.14         | I    | Minnp1                                                              | multiple inositol polyphosphate histidine phosphatase 1                       |      |
| NM_019772    | 200    | P        | 478    | P        | 2.14         | I    | 1110004F10F                                                         | RIKEN cDNA 1110004F10 gene                                                    |      |
| NM_133800    | 57     | A        | 189    | P        | 2.14         | I    | C78541                                                              | expressed sequence C78541                                                     |      |
| NM_009146 // | 159    | P        | 338    | P        | 2.14         | I    | Frrs1 // LOC                                                        | ferric-chelate reductase 1 // similar to stromal cell derived factor recepto  |      |
| NM_009408    | 740    | P        | 1468   | P        | 2.14         | I    | Top1                                                                | topoisomerase (DNA) I                                                         |      |
| NM_025927    | 226    | P        | 493    | P        | 2.14         | I    | Mrp45                                                               | mitochondrial ribosomal protein L45                                           |      |
| NM_021536    | 132    | P        | 303    | P        | 2.14         | I    | Rho1                                                                | ras homolog gene family, member 1 1                                           |      |
| NM_052973    | 154    | P        | 333    | P        | 2.14         | I    | Strn3                                                               | striatin, calmodulin binding protein 3                                        |      |
| NM_011969    | 497    | P        | 1094   | P        | 2.14         | I    | Psm7                                                                | proteasome (prosome, macropain) subunit, alpha type 7                         |      |
| NM_019648    | 267    | P        | 583    | P        | 2.14         | I    | Metap2                                                              | methionine aminopeptidase 2                                                   |      |
| NM_027959    | 180    | P        | 419    | P        | 2.14         | MI   | Pdia6                                                               | protein disulfide isomerase associated 6                                      |      |
| NM_146012    | 158    | P        | 345    | P        | 2.14         | MI   | Ctdsp2                                                              | CTD (carboxy-terminal domain, RNA polymerase II, polypeptide A) sma           |      |
| NM_146144    | 52     | P        | 145    | P        | 2.14         | I    | Usp1                                                                | ubiquitin specific peptidase 1                                                |      |
| NM_025550    | 483    | P        | 997    | P        | 2.14         | I    | Psm6                                                                | proteasome (prosome, macropain) 26S subunit, non-ATPase, 6                    |      |
| NM_030018    | 518    | P        | 1140   | P        | 2.14         | I    | 1mem50b                                                             | transmembrane protein 50B                                                     |      |
| NM_012010    | 623    | P        | 1259   | P        | 2.14         | I    | Erf253x                                                             | eukaryotic translation initiation factor 2, subunit 3, structural gene X-link |      |
| NM_011816    | 505    | P        | 1086   | P        | 2.14         | I    | E430034L04R                                                         | RIKEN cDNA E430034L04 gene                                                    |      |
| NM_145354    | 173    | P        | 454    | P        | 2.14         | I    | Nsun2                                                               | NOL1/NOP2/Sun domain family 2                                                 |      |
| NM_133975    | 842    | P        | 1542   | P        | 2.14         | I    | Tnp12                                                               | thyroid hormone receptor interactor 12                                        |      |
| XM_00100011  | 110    | P        | 255    | P        | 2.14         | I    | 4930453N24R                                                         | RIKEN cDNA 4930453N24 gene                                                    |      |
| NM_022989 // | 54     | P        | 131    | P        | 2.14         | I    | Arbp6 // LOC                                                        | ADP-ribosylation factor-like 6 interacting protein 6 // similar to ADP-ribo   |      |
| NM_027950    | 363    | P        | 737    | P        | 2.14         | MI   | 1700012B18R                                                         | RIKEN cDNA 1700012B18 gene                                                    |      |
| NM_008704    | 236    | P        | 573    | P        | 2.14         | I    | Nme1                                                                | expressed in non-melanocytic cells 1, protein                                 |      |
| NM_146165    | 225    | P        | 365    | P        | 2.14         | I    | JTV1                                                                | JTV1 gene                                                                     |      |
| XM_203592 // | 261    | P        | 487    | P        | 2.14         | MI   | Hbld1                                                               | HESB like domain containing 1                                                 |      |
| NM_026759    | 339    | P        | 628    | P        | 2.14         | I    | Mrp13                                                               | mitochondrial ribosomal protein L13                                           |      |
| NM_053124 // | 268    | P        | 694    | P        | 2.14         | I    | Smarca5 // 9                                                        | SWI/SNF related, matrix associated, actin dependent regulator of chrom        |      |
| NM_053124 // | 142    | P        | 268    | P        | 2.14         | I    | Smarca5 // 9                                                        | SWI/SNF related, matrix associated, actin dependent regulator of chrom        |      |
| NM_009011    | 487    | P        | 898    | P        | 2.14         | MI   | Rad23b                                                              | RAD23b homolog (S. cerevisiae)                                                |      |
| NM_028923 // | 83     | P        | 149    | P        | 2.14         | I    | 111020L19R                                                          | RIKEN cDNA 111020L19 gene                                                     |      |
| NM_025909    | 82     | P        | 383    | P        | 2.14         | I    | Omat1                                                               | OMAT1 homolog, zinc metalloprotease (S. cerevisiae)                           |      |
| NM_010720    | 221    | P        | 487    | P        | 2.14         | I    | Eflfa1                                                              | eukaryotic translation initiation factor 1A                                   |      |
| NM_029271    | 305    | P        | 788    | P        | 2.14         | I    | Mrp42                                                               | mitochondrial ribosomal protein L32                                           |      |
| NM_029554    | 487    | P        | 893    | P        | 2.14         | I    | 081004J011R                                                         | RIKEN cDNA 081004J011 gene                                                    |      |
| NM_145571    | 114    | P        | 250    | P        | 2.14         | I    | Mobk1b                                                              | MOB1, Mps One Binder kinase activator-like 1B (yeast)                         |      |
| NM_026368    | 50     | P        | 119    | P        | 2.14         | MI   | 5830433M19R                                                         | RIKEN cDNA 5830433M19 gene                                                    |      |
| XM_00100101  | 249    | P        | 672    | P        | 2.14         | I    | Ighg                                                                | immunoglobulin heavy chain (gamma polypeptide)                                |      |
| NM_011264    | 89     | P        | 193    | P        | 2.14         | I    | Rev3l                                                               | REV3-like, catalytic subunit of DNA polymerase zeta RAD54 like (S. cer        |      |
| NM_144535    | 89     | P        | 193    | P        | 2.14         | I    | 4932432K03R                                                         | RIKEN cDNA 4932432K03 gene                                                    |      |
| NM_028398    | 148    | P        | 287    | P        | 2.14         | I    | 2900008B13R                                                         | RIKEN cDNA 2900008B13 gene                                                    |      |
| NM_025549    | 82     | P        | 176    | P        | 2.14         | I    | Artd4                                                               | arrestin domain containing 4                                                  |      |
| NM_020508 // | 106    | P        | 230    | P        | 2.14         | I    | Brd4                                                                | bromodomain containing 4                                                      |      |
| NM_010439    | 436    | P        | 1084   | P        | 2.14         | I    | Hmgb1                                                               | high mobility group box 1                                                     |      |
| NM_026998    | 154    | P        | 341    | P        | 2.14         | MI   | Srx6                                                                | sorting nexin 6                                                               |      |
| NM_023220    | 363    | P        | 791    | P        | 2.14         | I    | 2010106G01R                                                         | RIKEN cDNA 2010106G01 gene                                                    |      |
| NM_144544    | 3699   | P        | 7554   | P        | 2.14         | I    | 2210407C18R                                                         | RIKEN cDNA 2210407C18 gene                                                    |      |
| NM_011151    | 255    | P        | 640    | P        | 2.14         | MI   | Ppm1b                                                               | protein phosphatase 1B, magnesium dependent, beta isoform                     |      |
| NM_0010385B  | 124    | P        | 298    | P        | 2.14         | I    | Adar                                                                | adenosine deaminase, RNA-specific                                             |      |
| NM_010258    | 289    | P        | 593    | P        | 2.14         | I    | Gata6                                                               | GATA binding protein 6                                                        |      |
| NM_013830    | 125    | P        | 280    | P        | 2.14         | MI   | Prpf4b                                                              | PRPF4 pre-mRNA processing factor 4 homolog B (yeast)                          |      |
| NM_139144    | 74     | P        | 175    | P        | 2.14         | I    | Ogt                                                                 | O-linked N-acetylglucosamine (GlcNAc) transferase (UDP-N-acetylglucos         |      |

| Transcript   | WT     |          | KO     |          | Change KO/WT |      | Symbol       | Title                                                                       | Gene |
|--------------|--------|----------|--------|----------|--------------|------|--------------|-----------------------------------------------------------------------------|------|
|              | Signal | Detectio | Signal | Detectio | Fold         | Call |              |                                                                             |      |
| NM_139144    | 129    | P        | 240    | P        | 2.14         | MI   | Ogt          | O-linked N-acetylglucosamine (GlcNAc) transferase (UDP-N-acetylglucos       |      |
| NM_011899 // | 396    | P        | 958    | P        | 2.14         | I    | Srp54 // LOC | signal recognition particle 54 // similar to signal recognition particle 54 |      |
| NM_009652    | 161    | P        | 316    | P        | 2.14         | I    | Akt1         | thymoma viral proto-oncogene 1                                              |      |
| NM_008951    | 328    | P        | 675    | P        | 2.14         | I    | Psm4         | proteasome (prosome, macropain) 26S subunit, non-ATPase, 4                  |      |
| NM_011083    | 82     | P        | 183    | P        | 2.14         | I    | Pik3c2a      | phosphatidylinositol 3-kinase, C2 domain containing, alpha polypeptide      |      |
| XM_00100141R | 113    | P        | 245    | P        | 2.14         | I    | 2610301G19R  | RIKEN cDNA 2610301G19 gene                                                  |      |
| NM_007883    | 39     | P        | 113    | P        | 2.14         | I    | Dsg2         | desmoglein 2                                                                |      |
| NM_029362    | 428    | P        | 1077   | P        | 2.14         | I    | Chmp4b       | chromatin modifying protein 4B                                              |      |
| NM_199006    | 589    | P        | 1448   | P        | 2.14         | I    | 6330578E17R  | RIKEN cDNA 6330578E17 gene                                                  |      |
| NM_012008    | 181    | P        | 430    | P        | 2.14         | I    | bdx3y        | DEAD (Asp-Glu-Ala-Asp) box polypeptide 3, Y-linked                          |      |
| NM_028410    | 101    | P        | 257    | P        | 2.14         | I    | Prkrir       | protein-kinase, interferon-inducible double stranded RNA dependent inhibi   |      |
| NM_028410    | 96     | P        | 131    | P        | 2.14         | I    | Prkrir       | protein-kinase, interferon-inducible double stranded RNA dependent inhibi   |      |
| NM_026390    | 242    | P        | 590    | P        | 2.14         | I    | Ubx2         | UBX domain containing 2                                                     |      |
| NM_028013    | 45     | P        | 90     | P        | 2.14         | MI   | Endod1       | endonuclease domain containing 1                                            |      |
| NM_025576    | 657    | P        | 1379   | P        | 2.14         | I    | Hfpmt1       | protein tyrosine phosphatase, mitochondrial 1                               |      |
| NM_177258    | 124    | P        | 250    | P        | 2.14         | I    | Glm2         | G elongation factor, mitochondrial 2                                        |      |
| NM_026816    | 116    | P        | 268    | P        | 2.14         | I    | Gtf2f2       | general transcription factor IIF, polypeptide 2                             |      |
| NM_133242    | 283    | P        | 604    | P        | 2.14         | I    | Rnpc2        | RNA-binding region (RNPI1, RRM) containing 2                                |      |
| NM_133916    | 216    | P        | 499    | P        | 2.14         | I    | Eif359       | eukaryotic translation initiation factor 3, subunit 9 (eta)                 |      |
| NM_212484    | 335    | P        | 681    | P        | 2.14         | I    | Cno6f        | CCR4-NOT transcription complex, subunit 6                                   |      |
| NM_178892    | 206    | P        | 446    | P        | 2.14         | I    | Tiparp       | T/CDD-inducible poly(ADP-ribose) polymerase                                 |      |
| NM_021720    | 65     | P        | 154    | P        | 2.14         | I    | Donson       | downstream neighbor of SON                                                  |      |
| NM_025974    | 683    | P        | 1852   | P        | 2.14         | I    | Rpl14        | ribosomal protein L14                                                       |      |
| NM_175224    | 509    | P        | 1234   | P        | 2.14         | I    | Metap1       | methionyl aminopeptidase 1                                                  |      |
| NM_172677    | 238    | P        | 468    | P        | 2.14         | I    | Ythdf3       | YTH domain family 3                                                         |      |
| NM_024255    | 159    | P        | 384    | P        | 2.14         | I    | Hsd12        | hydroxysteroid dehydrogenase like 2                                         |      |
| NM_0010331R  | 190    | P        | 376    | P        | 2.14         | I    | Fbxo33       | F-box only protein 33                                                       |      |
| NM_0010331R  | 197    | P        | 457    | P        | 2.14         | I    | Fbxo33       | F-box only protein 33                                                       |      |
| NM_172582    | 68     | P        | 186    | P        | 2.14         | I    | Coq6         | coenzyme Q6 homolog (yeast)                                                 |      |
| ---          | 418    | P        | 803    | P        | 2.14         | MI   | ---          | ---                                                                         |      |
| NM_010472    | 594    | P        | 1255   | P        | 2.14         | I    | Hrb          | HIV-1 Rev binding protein                                                   |      |
| NM_0010085   | 143    | P        | 343    | P        | 2.14         | I    | 2700069A02R  | RIKEN cDNA 2700069A02 gene                                                  |      |
| NM_153521    | 247    | P        | 519    | P        | 2.14         | I    | Lrrc41       | leucine rich repeat containing 41                                           |      |
| NM_144802    | 210    | P        | 453    | P        | 2.14         | I</  |              |                                                                             |      |





| Transcript   | WT     |          | KO     |          | Change KO/WT |      | Gene         |                                                                                                                                           |
|--------------|--------|----------|--------|----------|--------------|------|--------------|-------------------------------------------------------------------------------------------------------------------------------------------|
|              | Signal | Detectio | Signal | Detectio | Fold         | Call | Symbol       | Title                                                                                                                                     |
| NM_00101239  | 205    | P        | 512    | P        | 2.14         | I    | Ptpia        | protein tyrosine phosphatase-like (proline instead of catalytic arginine), <i>Mus musculus</i> similar to inward rectifier potassium chan |
| ---          | 144    | P        | 269    | P        | 2.14         | I    | ---          | PREOIC1ED: Mus musculus similar to inward rectifier potassium chan                                                                        |
| NM_172153 // | 89     | P        | 215    | P        | 2.14         | I    | A630039H10   | RIKEN cDNA A630039H10 gene                                                                                                                |
| NM_009899    | 227    | P        | 448    | P        | 2.14         | I    | Pura         | purine rich element binding protein A                                                                                                     |
| NM_175151    | 56     | A        | 152    | P        | 2.14         | I    | Taldn1       | TaID DNase domain containing 1                                                                                                            |
| NM_133724    | 143    | P        | 362    | P        | 2.14         | I    | Cno          | capuccino                                                                                                                                 |
| NM_008388    | 702    | P        | 1498   | P        | 2.14         | I    | Eif358       | eukaryotic translation initiation factor 3, subunit 6                                                                                     |
| NM_023455    | 79     | P        | 154    | P        | 2.14         | I    | Z010318F05   | RIKEN cDNA Z010318F05 gene                                                                                                                |
| NM_176835    | 402    | P        | 843    | P        | 2.14         | I    | Z810451A06   | RIKEN cDNA Z810451A06 gene                                                                                                                |
| NM_025279    | 1244   | P        | 2715   | P        | 2.14         | I    | Hnrpk        | heterogeneous nuclear ribonucleoprotein K                                                                                                 |
| NM_175317    | 199    | P        | 370    | P        | 2.14         | I    | lefud1       | elongation factor 1U GTP binding domain containing 1                                                                                      |
| NM_134129    | 66     | P        | 149    | P        | 2.14         | I    | Prpf19       | PRP19/PSO4 pre-mRNA processing factor 19 homolog (S. cerevisiae)                                                                          |
| NM_011965    | 860    | P        | 2027   | P        | 2.30         | I    | Psma1        | proteasome (prosome, macropain) subunit, alpha type 1                                                                                     |
| NM_175565 // | 484    | P        | 1122   | P        | 2.30         | I    | Ca33         | carnitine deficiency-associated gene expressed in ventricle 3                                                                             |
| NM_022997    | 94     | P        | 276    | P        | 2.30         | I    | Vps35        | vacuolar protein sorting 35                                                                                                               |
| NM_009840    | 375    | P        | 918    | P        | 2.30         | I    | Cc8          | chaperonin subunit 8 (theta)                                                                                                              |
| NM_008722    | 548    | P        | 1252   | P        | 2.30         | I    | Npm1         | nucleophosmin 1                                                                                                                           |
| NM_021510    | 434    | P        | 1016   | P        | 2.30         | I    | Hnrhp1       | heterogeneous nuclear ribonucleoprotein H1                                                                                                |
| NM_009836    | 391    | P        | 900    | P        | 2.30         | I    | Cc33         | chaperonin subunit 3 (gamma)                                                                                                              |
| NM_009076    | 1057   | P        | 2508   | P        | 2.30         | I    | Rpl12        | ribosomal protein L12                                                                                                                     |
| NM_024221    | 850    | P        | 2071   | P        | 2.30         | I    | Pdhb         | pyruvate dehydrogenase (lipoamide) beta                                                                                                   |
| NM_015824    | 88     | P        | 213    | P        | 2.30         | I    | Orc3         | origin recognition complex, subunit 3-like (S. cerevisiae)                                                                                |
| NM_007839    | 371    | P        | 912    | P        | 2.30         | I    | Dhx15        | DEAH (Asp-Glu-Ala-His) box polypeptide 15                                                                                                 |
| NM_007839    | 545    | P        | 1241   | P        | 2.30         | I    | Dhx15        | DEAH (Asp-Glu-Ala-His) box polypeptide 15                                                                                                 |
| NM_013663    | 54     | P        | 118    | P        | 2.30         | I    | Sfrs3        | splicing factor, arginine/serine-rich 3 (SRP20)                                                                                           |
| NM_026508    | 279    | P        | 585    | P        | 2.30         | I    | Traf1        | TNF receptor-associated protein 1                                                                                                         |
| NM_010439    | 327    | P        | 763    | P        | 2.30         | I    | Hmgb1        | high mobility group box 1                                                                                                                 |
| NM_026383    | 466    | P        | 1178   | P        | 2.30         | I    | Pncr2        | proline-rich nuclear receptor coactivator 2                                                                                               |
| NM_010271    | 648    | P        | 1610   | P        | 2.30         | I    | Gpd1         | glycerol-3-phosphate dehydrogenase 1 (soluble)                                                                                            |
| NM_010760    | 474    | P        | 999    | P        | 2.30         | I    | Magoh        | mago-nashi homolog, proliferation-associated (Drosophila)                                                                                 |
| NM_016682    | 226    | P        | 607    | P        | 2.30         | I    | Uble1b       | ubiquitin-like 1 (sentrin) activating enzyme E1B                                                                                          |
| NM_007452    | 429    | P        | 944    | P        | 2.30         | I    | Prdx3        | peroxiredoxin 3                                                                                                                           |
| NM_018829 // | 128    | P        | 352    | P        | 2.30         | I    | Ap3m1 // LO  | adaptor-related protein complex 3, mu 1 subunit // similar to AP-3 comp                                                                   |
| NM_009278    | 50     | P        | 151    | P        | 2.30         | I    | Ssb          | Sjogren syndrome antigen B                                                                                                                |
| NM_133718    | 265    | P        | 603    | P        | 2.30         | I    | Imem30a      | transmembrane protein 30A                                                                                                                 |
| NM_016739    | 925    | P        | 2069   | P        | 2.30         | I    | Gpiap1       | GPI-anchored membrane protein 1                                                                                                           |
| NM_138591    | 167    | P        | 343    | P        | 2.30         | I    | Gfm1         | G elongation factor, mitochondrial 1                                                                                                      |
| NM_00103399  | 27     | P        | 52     | P        | 2.30         | I    | Ube3a        | ubiquitin protein ligase E3A                                                                                                              |
| NM_019581    | 292    | P        | 723    | P        | 2.30         | I    | Gtbbp2       | GTP binding protein 2                                                                                                                     |
| NM_025683    | 219    | P        | 455    | P        | 2.30         | I    | Rpe          | ribulose-5-phosphate-3-epimerase                                                                                                          |
| NM_008320    | 545    | P        | 1215   | P        | 2.30         | I    | Irf8         | interferon regulatory factor 8                                                                                                            |
| NM_010436    | 281    | P        | 466    | P        | 2.30         | I    | H2afx        | H2A histone family, member X                                                                                                              |
| NM_011484    | 140    | P        | 348    | P        | 2.30         | I    | Stam         | signal transducing adaptor molecule (SH3 domain and ITAM motif) 1                                                                         |
| NM_025384    | 298    | P        | 679    | P        | 2.30         | I    | Dnajc15      | Dnaj (Hsp40) homolog, subfamily C, member 15                                                                                              |
| NM_029397 // | 48     | P        | 118    | P        | 2.30         | I    | Rbm12        | RNA binding motif protein 12                                                                                                              |
| NM_008989    | 862    | P        | 1876   | P        | 2.30         | I    | Por          | P450 (cytochrome) oxidoreductase                                                                                                          |
| NM_009455 // | 362    | P        | 883    | P        | 2.30         | I    | Ube2e1 // LC | ubiquitin-conjugating enzyme E2E 1, UBC4/5 homolog (yeast) // similar                                                                     |
| NM_011482    | 225    | P        | 512    | P        | 2.30         | I    | Nhp21        | NHP2 non-histone chromosome protein 2-like 1 (S. cerevisiae)                                                                              |
| NM_026768    | 202    | P        | 486    | P        | 2.30         | I    | Mrps18a      | mitochondrial ribosomal protein S18A                                                                                                      |
| NM_026352 // | 88     | P        | 192    | P        | 2.30         | I    | Ppid // Lamp | peptidylprolyl isomerase D (cyclophilin D) // lysosomal-associated mem                                                                    |
| NM_021524    | 265    | P        | 575    | P        | 2.30         | I    | Pbef1        | pre-B-cell cyclin-enhancing factor 1                                                                                                      |
| NM_021338    | 185    | P        | 336    | P        | 2.30         | I    | Snrpa1       | small nuclear ribonucleoprotein polypeptide A                                                                                             |
| NM_0010262   | 191    | P        | 540    | P        | 2.30         | I    | Entpd5       | ectonucleoside triphosphate diphosphonucleotidase 5                                                                                       |
| NM_0010262   | 310    | P        | 702    | P        | 2.30         | I    | Entpd5       | ectonucleoside triphosphate diphosphonucleotidase 5                                                                                       |
| NM_013899    | 283    | P        | 629    | P        | 2.30         | I    | Timm10       | translocase of inner mitochondrial membrane 10 homolog (yeast)                                                                            |
| NM_009373    | 934    | P        | 2164   | P        | 2.30         | I    | Tgm2         | transglutaminase 2, C polypeptide                                                                                                         |
| NM_010325    | 353    | P        | 786    | P        | 2.30         | I    | Goz2         | glutamate oxaloacetate transaminase 2, mitochondrial                                                                                      |
| NM_016878    | 383    | P        | 883    | P        | 2.30         | I    | Eif3s4       | eukaryotic translation initiation factor 3, subunit 4 (delta)                                                                             |
| NM_023200    | 181    | P        | 389    | P        | 2.30         | I    | Ppp1r7       | protein phosphatase 1, regulatory (inhibitor) subunit 7                                                                                   |
| NM_007754    | 108    | P        | 256    | P        | 2.30         | I    | Cpd          | carboxypeptidase D                                                                                                                        |
| NM_053089    | 86     | P        | 199    | P        | 2.30         | I    | Narg1        | NMDA receptor-regulated gene 1                                                                                                            |
| NM_007688    | 187    | P        | 458    | P        | 2.30         | I    | Cfi2         | cofilin 2, muscle                                                                                                                         |
| NM_016715    | 176    | P        | 575    | P        | 2.30         | I    | Tple2        | transmembrane phosphoinositide 3-phosphatase and tensin homolog 2                                                                         |
| NM_026519    | 300    | P        | 688    | P        | 2.30         | I    | Imem85       | transmembrane protein 85                                                                                                                  |
| ---          | 126    | P        | 459    | P        | 2.30         | I    | Malat1       | metastasis associated lung adenocarcinoma transcript 1 (non-coding R                                                                      |
| NM_022324    | 220    | P        | 540    | P        | 2.30         | I    | Sdf2l1       | stromal cell-derived factor 2-like 1                                                                                                      |
| NM_010280    | 36     | P        | 115    | P        | 2.30         | I    | Gbp2         | guanylate nucleotide binding protein 2                                                                                                    |
| NM_027136 // | 88     | P        | 193    | P        | 2.30         | I    | Dph1 // RP2  | DPH1 homolog (S. cerevisiae) // candidate tumor suppressor OVCA2                                                                          |
| NM_009075    | 217    | P        | 476    | P        | 2.30         | I    | Rpia         | ribose 5-phosphate isomerase A                                                                                                            |
| NM_008448    | 312    | P        | 693    | P        | 2.30         | I    | Kif5b        | kinesin family member 5b                                                                                                                  |
| NM_008448    | 270    | P        | 615    | P        | 2.30         | I    | Kif5b        | kinesin family member 5b                                                                                                                  |
| XM_0010052   | 107    | P        | 213    | P        | 2.30         | I    | LOC630509    | similar to H-2 class I histocompatibility antigen, Q7 alpha chain precurs                                                                 |
| NM_025918    | 58     | P        | 111    | P        | 2.30         | I    | Ccdc43       | coiled-coil domain containing 43                                                                                                          |
| NM_025814    | 524    | P        | 1174   | P        | 2.30         | I    | Serp1e1      | Serp1e1 mRNA binding protein 1                                                                                                            |
| NM_025879    | 120    | P        | 238    | P        | 2.30         | I    | Z410002O22   | RIKEN cDNA Z410002O22 gene                                                                                                                |
| NM_007473    | 117    | P        | 251    | P        | 2.30         | I    | Aqp7         | aquaporin 7                                                                                                                               |
| NM_013515    | 205    | P        | 410    | P        | 2.30         | I    | Stom         | stomatin                                                                                                                                  |
| NM_009186    | 314    | P        | 840    | P        | 2.30         | I    | Sfrs10       | splicing factor, arginine/serine-rich 10 (transformer 2 homolog, Drosoph                                                                  |
| NM_010281 // | 74     | P        | 143    | P        | 2.30         | I    | Ggh // LOC8  | gamma-glutamyl hydrolase // similar to Gamma-glutamyl hydrolase prec                                                                      |
| NM_138756    | 197    | P        | 488    | P        | 2.30         | I    | Sic25a36     | solute carrier family 25, member 36                                                                                                       |
| NM_025437    | 266    | P        | 604    | P        | 2.30         | I    | Eif1ay       | eukaryotic translation initiation factor 1A, Y-linked                                                                                     |
| NM_033618    | 182    | P        | 396    | P        | 2.30         | I    | Supt16h      | suppressor of 1y 16 homolog (S. cerevisiae)                                                                                               |
| NM_025474    | 345    | P        | 803    | P        | 2.30         | I    | Mrps14       | mitochondrial ribosomal protein S14                                                                                                       |
| NM_0010248   | 48     | P        | 124    | P        | 2.30         | I    | Cebpz        | CCAAT/enhancer binding protein zeta                                                                                                       |
| NM_026434    | 83     | P        | 148    | P        | 2.30         | I    | Rbm18        | RNA binding motif protein 18                                                                                                              |
| NM_021507    | 60     | P        | 1377   | P        | 2.30         | I    | Sqrd1        | sulfide quinone reductase-like (yeast)                                                                                                    |

| Transcript   | WT     |          | KO     |          | Change KO/WT |      | Gene         |                                                                         |
|--------------|--------|----------|--------|----------|--------------|------|--------------|-------------------------------------------------------------------------|
|              | Signal | Detectio | Signal | Detectio | Fold         | Call | Symbol       | Title                                                                   |
| NM_008222    | 170    | P        | 381    | P        | 2.30         | I    | Hccs         | holocytochrome c synthetase                                             |
| NM_009847    | 105    | P        | 232    | P        | 2.30         | I    | Cd2ap        | CD2-associated protein                                                  |
| NM_009847    | 115    | P        | 308    | P        | 2.30         | I    | Cd2ap        | CD2-associated protein                                                  |
| NM_018785    | 94     | P        | 206    | P        | 2.30         | I    | Prp40a       | PRP40 pre-mRNA processing factor 40 homolog A (yeast)                   |
| NM_018700    | 427    | P        | 748    | P        | 2.30         | I    | Mapk8        | mitogen activated protein kinase 8                                      |
| NM_016856    | 78     | P        | 189    | P        | 2.30         | I    | Cpsf2        | cleavage and polyadenylation specific factor 2                          |
| NM_007690    | 133    | P        | 285    | P        | 2.30         | I    | Chd1         | chromodomain helicase DNA binding protein 1                             |
| NM_00103954  | 102    | P        | 227    | P        | 2.30         | I    | Myc6         | myosin VI                                                               |
| NM_013631    | 327    | P        | 747    | P        | 2.30         | I    | Psk1         | pyruvate kinase liver and red blood cell                                |
| NM_021526    | 763    | P        | 1730   | P        | 2.30         | I    | Psm14        | proteasome (prosome, macropain) 26S subunit, non-ATPase, 14             |
| NM_024174    | 181    | P        | 380    | P        | 2.30         | I    | Mrps23       | mitochondrial ribosomal protein S23                                     |
| NM_008740    | 321    | P        | 819    | P        | 2.30         | I    | Nsf          | N-ethylmaleimide sensitive fusion protein                               |
| NM_009667    | 95     | P        | 218    | P        | 2.30         | I    | Ampd3        | AMP deaminase 3                                                         |
| NM_015756    | 458    | P        | 1187   | P        | 2.30         | I    | Shrm         | shroom                                                                  |
| XM_974161 // | 818    | P        | 1348   | P        | 2.30         | I    | LOC671237    | similar to Putative RNA-binding protein 3 (RNA-binding motif protein 3) |
| NM_0010158   | 215    | P        | 500    | P        | 2.30         | I    | Taf9         | TAF9 RNA polymerase II, TATA box binding protein (TBP)-associated fac   |
| NM_019402    | 450    | P        | 990    | P        | 2.30         | I    | Fabp1        | poly(A) binding protein, nuclear 1                                      |
| NM_019797    | 155    | P        | 411    | P        | 2.30         | I    | Trip4        | thyroid hormone receptor interactor 4                                   |
| NM_019729    | 183    | P        | 355    | P        | 2.30         | I    | Usp8         | ubiquitin specific peptidase 8                                          |
| NM_025824    | 632    | P        | 1232   | P        | 2.30         | I    | Bzw1         | basic leucine zipper and WD domains 1                                   |
| NM_016805    | 562    | P        | 1269   | P        | 2.30         | I    | Hnrpu        | heterogeneous nuclear ribonucleoprotein U                               |
| NM_011119    | 232    | P        | 552    | P        | 2.30         | I    | Pa2g4        | proliferation-associated 2G4                                            |
| NM_007861    | 855    | P        | 1478   | P        | 2.30         | I    | Did          | dihydrolipoamide dehydrogenase                                          |
| NM_025682    | 57     | P        | 140    | P        | 2.30         | I    | MI           | paraspeckle protein 1                                                   |
| NM_007453    | 1212   | P        | 2836   | P        | 2.30         | I    | Prdx6        | peroxiredoxin 6                                                         |
| NM_010918    | 63     | P        | 192    | P        | 2.30         | I    | Nktr         | natural killer tumor recognition sequence                               |
| NM_008891    | 167    | P        | 394    | P        | 2.30         | I    | Pnn          | pinin                                                                   |
| NM_009677    | 122    | P        | 271    | P        | 2.30         | I    | Ap1g1        | adaptor protein complex AP-1, gamma 1 subunit                           |
| NM_023215    | 230    | P        | 562    | P        | 2.30         | I    | Z500003M10   | RIKEN cDNA Z500003M10 gene                                              |
| NM_025541    | 106    | P        | 256    | P        | 2.30         | I    | Asf1a        | ASF1 anti-silencing function 1 homolog A (S. cerevisiae)                |
| NM_145569    | 222    | P        | 522    | P        | 2.30         | I    | Mat2a        | methionine adenosyltransferase II, alpha                                |
| NM_148144    | 78     | P        | 191    | P        | 2.30         | I    | Usp1         | ubiquitin specific peptidase 1                                          |
| NM_011811    | 102    | P        | 390    | P        | 2.30         | I    | Fars1b       | phenylalanine-tRNA synthetase-like, beta subunit                        |
| NM_172665    | 112    | P        | 314    | P        | 2.30         | I    | Pdk1         | pyruvate dehydrogenase kinase, isoenzyme 1                              |
| NM_145360 // | 74     | P        | 182    | P        | 2.30         | I    | Idi1         | isopentenyl-diphosphate delta isomerase                                 |
| NM_145540 // | 75     | P        | 186    | P        | 2.30         | I    | Ints3        | integrator complex subunit 3                                            |
| NM_145514    | 236    | P        | 586    | P        | 2.30         | I    | Wdr26        | WD repeat domain 26                                                     |
| XM_283579 // | 149    | P        | 370    | P        | 2.30         | I    | 9430016H08   | RIKEN cDNA 9430016H08 gene                                              |
| NM_053124 // | 105    | P        | 259    | P        | 2.30         | I    | Smarca5 // 9 | SWI/SNF related, matrix associated, actin dependent regulator of chroma |
| NM_172410    | 56     | P        | 178    | P        | 2.30         | I    | Nup93        | nucleoporin 93                                                          |
| NM_170591    | 86     | P        | 166    | P        | 2.30         | I    | Nup1         | nucleoporin like 1                                                      |
| NM_025690 // | 189    | P        | 501    | P        | 2.30         | I    | Sitm         | SAFB-like, transcription modulator                                      |
| NM_027415    | 227    | P        | 538</  |          |              |      |              |                                                                         |

| Transcript  | WT     |          | KO     |          | Change KO/WT |      | Symbol                | Title                                                                          | Gene |
|-------------|--------|----------|--------|----------|--------------|------|-----------------------|--------------------------------------------------------------------------------|------|
|             | Signal | Detectio | Signal | Detectio | Fold         | Call |                       |                                                                                |      |
| NM_140758   | 773    | P        | 178    | P        | 2.30         | I    | Zfp518                | zinc finger protein 518                                                        |      |
| NM_025333   | 73     | P        | 425    | P        | 2.30         | I    | RIKEN cDNA 0610038F07 | RIKEN cDNA 0610038F07 gene                                                     |      |
| NM_172712   | 68     | P        | 173    | P        | 2.30         | I    | Ube12                 | ubiquitin-activating enzyme E1-like 2                                          |      |
| ---         | 109    | P        | 240    | P        | 2.30         | I    | Malat1                | melastasis associated lung adenocarcinoma transcript 1 (non-coding RNA)        |      |
| NM_027375   | 611    | P        | 1340   | P        | 2.30         | I    | Gcc2                  | GRIP and coiled-coil domain containing 2                                       |      |
| NM_199008   | 269    | P        | 654    | P        | 2.30         | I    | Cox11                 | COX11 homolog, cytochrome c oxidase assembly protein (yeast)                   |      |
| NM_131300   | 39     | P        | 129    | P        | 2.30         | I    | 2310030N02            | RIKEN cDNA 2310030N02 gene                                                     |      |
| NM_172407   | 63     | P        | 217    | P        | 2.30         | I    | 492151116R            | RIKEN cDNA 492151116R gene                                                     |      |
| NM_178516   | 319    | P        | 758    | P        | 2.30         | I    | Psm11                 | proteasome (prosome, macropan) 28S subunit, non-ATPase, 1                      |      |
| NM_028035   | 169    | P        | 391    | P        | 2.30         | I    | Mrp55                 | mitochondrial ribosomal protein L55                                            |      |
| NM_011838   | 173    | P        | 311    | P        | 2.30         | I    | Phc1 // LOC           | phospholipid scramblase 1 // hypothetical LOC433328 // hypothetical p          |      |
| NM_028054   | 305    | P        | 684    | P        | 2.30         | I    | 2810474019            | RIKEN cDNA 2810474019 gene                                                     |      |
| NM_173389   | 229    | P        | 214    | P        | 2.30         | I    | Cyld                  | cylinaromatosis (turban tumor syndrome)                                        |      |
| NM_021394   | 562    | P        | 1335   | P        | 2.30         | I    | Zbp1                  | Z-DNA binding protein 1                                                        |      |
| NM_024437   | 232    | P        | 471    | P        | 2.30         | I    | Nudt7                 | nudix (nucleoside diphosphate linked moiety X)-type motif 7                    |      |
| NM_030116   | 118    | P        | 271    | P        | 2.30         | I    | Mrp9                  | mitochondrial ribosomal protein L9                                             |      |
| NM_0010031  | 156    | P        | 345    | P        | 2.30         | I    | 170002014R            | RIKEN cDNA 170002014R gene                                                     |      |
| NM_010485   | 234    | P        | 659    | P        | 2.30         | I    | Elav1                 | ELAV (embryonic lethal, abnormal vision, Drosophila)-like 1 (Hu antigen 1)     |      |
| NM_028906   | 93     | P        | 175    | P        | 2.30         | I    | Dpp8                  | dipeptidylpeptidase 8                                                          |      |
| NM_028877   | 105    | P        | 299    | P        | 2.30         | I    | Ppil // LOC4          | peptidyl prolyl isomerase H // similar to peptidyl prolyl isomerase H // sil   |      |
| NM_013897   | 622    | P        | 1515   | P        | 2.30         | I    | Timm8b                | translocase of inner mitochondrial membrane 8 homolog B (yeast)                |      |
| NM_00101804 | 330    | P        | 736    | P        | 2.30         | I    | Sp3                   | trans-acting transcription factor 3                                            |      |
| NM_025714   | 67     | M        | 91     | P        | 2.30         | I    | Ogfi2                 | outer dense fiber of sperm tails 2-like                                        |      |
| NM_019501   | 197    | P        | 395    | P        | 2.30         | I    | Pdss1                 | prenyl (solanesyl) diphosphate synthase, subunit 1                             |      |
| NM_00102438 | 175    | P        | 482    | P        | 2.30         | I    | Cns1                  | cardiolipin synthase 1                                                         |      |
| NM_021299   | 228    | P        | 476    | P        | 2.30         | I    | AK3                   | adenylate kinase 3                                                             |      |
| NM_026896   | 63     | P        | 146    | P        | 2.30         | I    | Crsp8                 | cofactor required for Sp1 transcriptional activation, subunit 8                |      |
| NM_016682   | 185    | P        | 475    | P        | 2.30         | I    | Uble1b                | ubiquitin-like 1 (sentrin) activating enzyme E1B                               |      |
| NM_007836   | 328    | P        | 693    | P        | 2.30         | I    | Cct2                  | chaperonin subunit 2 (beta)                                                    |      |
| NM_007836   | 1038   | P        | 2304   | P        | 2.30         | I    | Cct2                  | chaperonin subunit 2 (beta)                                                    |      |
| NM_028932   | 211    | P        | 565    | P        | 2.30         | I    | Eaf1                  | ELL associated factor 1                                                        |      |
| NM_00103330 | 142    | P        | 337    | P        | 2.30         | I    | Gmps                  | guanine monophosphate synthetase                                               |      |
| XR_003788   | 83     | P        | 167    | P        | 2.30         | I    | LOC672274             | similar to Transcription factor SOX-4                                          |      |
| NM_172543   | 46     | P        | 95     | P        | 2.30         | I    | 5730593F17R           | RIKEN cDNA 5730593F17R gene                                                    |      |
| NM_007622   | 153    | P        | 343    | P        | 2.30         | I    | Cbx1                  | chromobox homolog 1 (Drosophila HP1 beta)                                      |      |
| NM_173760   | 320    | P        | 696    | P        | 2.30         | I    | Hispd1                | histidine acid phosphatase domain containing 1                                 |      |
| NM_172254   | 164    | P        | 368    | P        | 2.30         | I    | Zcsl2                 | zinc finger, CSL domain containing 2                                           |      |
| NM_00101338 | 140    | P        | 279    | P        | 2.30         | I    | Dync1i2               | dynein, cytoplasmic 1 light intermediate chain 2                               |      |
| NM_172745   | 188    | P        | 688    | P        | 2.30         | I    | Tufm                  | Tu translation elongation factor, mitochondrial                                |      |
| NM_00103330 | 1088   | P        | 2393   | P        | 2.30         | I    | Ndufb6                | NADH dehydrogenase (ubiquinone) 1 beta subcomplex, 6                           |      |
| NM_011967   | 905    | P        | 2436   | P        | 2.30         | I    | Psm5a                 | proteasome (prosome, macropan) subunit, alpha type 5                           |      |
| ---         | 277    | P        | 683    | P        | 2.30         | I    | A1838057              | expressed sequence A1838057                                                    |      |
| NM_194424   | 75     | P        | 188    | P        | 2.30         | I    | Otu4d                 | OTU domain containing 4                                                        |      |
| NM_198303   | 148    | P        | 364    | P        | 2.30         | MI   | Eif5b                 | eukaryotic translation initiation factor 5B                                    |      |
| NM_198303   | 61     | P        | 133    | P        | 2.30         | I    | Eif5b                 | eukaryotic translation initiation factor 5B                                    |      |
| NM_030096   | 59     | P        | 119    | P        | 2.30         | MI   | Dax52                 | DEAD (Asp-Glu-Ala-Asp) box polypeptide 52                                      |      |
| NM_907664   | 121    | P        | 303    | P        | 2.30         | I    | 1810013L24F           | RIKEN cDNA 1810013L24F gene                                                    |      |
| NM_283903   | 278    | P        | 668    | P        | 2.30         | I    | B430201A12            | RIKEN cDNA B430201A12 gene                                                     |      |
| NM_028768   | 181    | P        | 421    | P        | 2.30         | I    | Armc8                 | armadillo repeat containing 8                                                  |      |
| NM_028768   | 58     | P        | 150    | P        | 2.30         | I    | Armc8                 | armadillo repeat containing 8                                                  |      |
| NM_153794   | 40     | P        | 95     | P        | 2.30         | I    | 4933403F05R           | RIKEN cDNA 4933403F05R gene                                                    |      |
| NM_00102988 | 64     | P        | 178    | P        | 2.30         | I    | Ate1                  | arginine-tRNA-protein transferase 1                                            |      |
| NM_172714   | 119    | P        | 250    | P        | 2.30         | I    | A1461788              | expressed sequence A1461788                                                    |      |
| ---         | 94     | P        | 232    | P        | 2.30         | I    | ---                   | ---                                                                            |      |
| NM_00100339 | 234    | P        | 499    | P        | 2.30         | I    | Ppig                  | peptidyl-prolyl isomerase G (cyclophilin G)                                    |      |
| NM_011733   | 381    | P        | 986    | P        | 2.30         | I    | Csda                  | cold shock domain protein A                                                    |      |
| NM_172665   | 79     | P        | 204    | P        | 2.30         | I    | Pdk1                  | pyruvate dehydrogenase kinase, isoenzyme 1                                     |      |
| ---         | 337    | P        | 792    | P        | 2.30         | I    | ---                   | Visual cortex cDNA, RIKEN full-length enriched library, clone:K230008          |      |
| NM_00103316 | 96     | P        | 194    | P        | 2.30         | I    | 2700094K13R           | RIKEN cDNA 2700094K13R gene                                                    |      |
| ---         | 42     | P        | 113    | P        | 2.30         | I    | 2310007O11            | RIKEN cDNA 2310007O11 gene                                                     |      |
| NM_177088   | 35     | P        | 100    | P        | 2.30         | I    | Ccdc45                | coiled-coil domain containing 45                                               |      |
| NM_172913   | 58     | P        | 162    | P        | 2.30         | I    | Tnrc9                 | trinucleotide repeat containing 9                                              |      |
| NM_153762   | 159    | P        | 358    | P        | 2.30         | I    | Rnf28 // LOC          | ring finger protein 26 // similar to ring finger protein 26 // similar to ring |      |
| NM_138585   | 70     | P        | 180    | P        | 2.30         | I    | Cherp                 | calcium homeostasis endoplasmic reticulum protein                              |      |
| NM_178891   | 70     | P        | 178    | P        | 2.30         | I    | 9930028C20            | RIKEN cDNA 9930028C20 gene                                                     |      |
| NM_019889   | 197    | P        | 483    | P        | 2.30         | I    | Rbm14                 | RNA binding motif protein 14                                                   |      |
| NM_026054   | 264    | P        | 579    | P        | 2.30         | I    | 2810474019            | RIKEN cDNA 2810474019 gene                                                     |      |
| NM_023913   | 175    | P        | 397    | P        | 2.30         | I    | Em1                   | Endoplasmic reticulum (ER) to nucleus signalling 1                             |      |
| NM_00104039 | 148    | P        | 419    | P        | 2.30         | I    | 1110020G09            | RIKEN cDNA 1110020G09 gene                                                     |      |
| NM_026553   | 184    | P        | 408    | P        | 2.30         | I    | Rpa1                  | replication protein A1                                                         |      |
| NM_026421   | 55     | P        | 155    | P        | 2.30         | I    | 2310057D15            | RIKEN cDNA 2310057D15 gene                                                     |      |
| NM_026508   | 101    | P        | 183    | P        | 2.30         | I    | Trap1                 | TNF receptor-associated protein 1                                              |      |
| ---         | 270    | P        | 447    | P        | 2.30         | I    | ---                   | ---                                                                            |      |
| NM_080708   | 92     | P        | 301    | P        | 2.30         | I    | Bmp2k                 | BMP2 inducible kinase                                                          |      |
| NM_00100060 | 489    | P        | 992    | P        | 2.30         | I    | 231006104R            | RIKEN cDNA 231006104R gene                                                     |      |
| NM_179203   | 241    | P        | 635    | P        | 2.30         | I    | Atad3a                | ATPase family, AAA domain containing 3A                                        |      |
| NM_00100488 | 42     | A        | 99     | P        | 2.30         | I    | 1110014N23R           | RIKEN cDNA 1110014N23R gene                                                    |      |
| NM_010074   | 94     | P        | 193    | P        | 2.30         | I    | Dpp4                  | Dipeptidylpeptidase 4                                                          |      |
| NM_009054   | 110    | P        | 193    | P        | 2.30         | I    | Tfrm27                | tripartite motif protein 27                                                    |      |
| NM_025408   | 94     | P        | 240    | P        | 2.30         | I    | Phca                  | phytylceramide, alkaline                                                       |      |
| NM_00100263 | 120    | P        | 223    | P        | 2.30         | I    | Bat2d                 | BAT2 domain containing 1                                                       |      |
| NM_011431   | 242    | P        | 610    | P        | 2.30         | I    | Eftud2                | elongation factor Tu GTP binding domain containing 2                           |      |
| NM_177910   | 427    | P        | 1018   | P        | 2.30         | I    | Gmpfb                 | GDP-mannose pyrophosphorylase B                                                |      |
| NM_029763   | 32     | P        | 80     | P        | 2.30         | MI   | Poir3f                | polymerase (RNA) III (DNA directed) polypeptide F                              |      |
| NM_008826   | 241    | P        | 524    | P        | 2.30         | I    | Pfk1                  | phosphofructokinase, liver, B-type                                             |      |
| NM_153775   | 80     | P        | 182    | P        | 2.30         | I    | 2310061F22R           | RIKEN cDNA 2310061F22R gene                                                    |      |

| Transcript  | WT     |          | KO     |          | Change KO/WT |      | Symbol         | Title                                                                            | Gene |
|-------------|--------|----------|--------|----------|--------------|------|----------------|----------------------------------------------------------------------------------|------|
|             | Signal | Detectio | Signal | Detectio | Fold         | Call |                |                                                                                  |      |
| NM_011276   | 66     | P        | 166    | P        | 2.30         | I    | Rnf12          | ring finger protein 12                                                           |      |
| NM_019768   | 1988   | P        | 3812   | P        | 2.30         | I    | Morf412 // LOC | mortality factor 4 like 2 // similar to Mortality factor 4-like protein 2 (MORF- |      |
| NM_976790   | 84     | P        | 215    | P        | 2.30         | I    | Tex10          | testis expressed gene 10                                                         |      |
| XM_0010005  | 39     | P        | 95     | P        | 2.30         | I    | A1506816       | expressed sequence A1506816                                                      |      |
| ---         | 240    | P        | 637    | P        | 2.30         | I    | ---            | ---                                                                              |      |
| XM_0010002  | 432    | P        | 965    | P        | 2.30         | I    | 9130208D14     | RIKEN cDNA 9130208D14 gene                                                       |      |
| NM_009280   | 90     | P        | 117    | P        | 2.30         | I    | Spnb2          | spectrin beta 2                                                                  |      |
| NM_011405   | 949    | P        | 1638   | P        | 2.30         | I    | Sic7a7         | solute carrier family 7 (cationic amino acid transporter, y+ system), membe      |      |
| NM_029386   | 149    | P        | 489    | P        | 2.30         | I    | 2410006H10     | RIKEN cDNA 2410006H10 gene                                                       |      |
| NM_010485   | 330    | P        | 787    | P        | 2.30         | I    | Elav1          | ELAV (embryonic lethal, abnormal vision, Drosophila)-like 1 (Hu antigen R        |      |
| NM_010684   | 348    | P        | 2406   | P        | 2.30         | I    | Krt1-18        | keratin complex 1 acidic, gene 18                                                |      |
| NM_028508   | 504    | P        | 955    | P        | 2.30         | I    | Snrpg // LOC   | small nuclear ribonucleoprotein polypeptide G // similar to small nuclear rit    |      |
| NM_028310   | 321    | P        | 811    | P        | 2.30         | I    | Mnp13          | mitochondrial ribosomal protein L13                                              |      |
| NM_00103339 | 1145   | P        | 2643   | P        | 2.30         | I    | Ak2            | adenylate kinase 2                                                               |      |
| NM_008320   | 305    | P        | 637    | P        | 2.30         | I    | Irf8           | interferon regulatory factor 8                                                   |      |
| NM_029963   | 91     | P        | 288    | P        | 2.30         | I    | Mrp55          | mitochondrial ribosomal protein S5                                               |      |
| NM_025894   | 296    | P        | 666    | P        | 2.30         | I    | Psmd12         | proteasome (prosome, macropan) 26S subunit, non-ATPase, 12                       |      |
| NM_025531   | 468    | P        | 1123   | P        | 2.30         | I    | 2310042G06     | RIKEN cDNA 2310042G06 gene                                                       |      |
| NM_010384   | 57     | P        | 126    | P        | 2.30         | I    | Gtlf2a         | general transcription factor II H, polypeptide 4                                 |      |
| NM_0010375  | 110    | P        | 228    | P        | 2.30         | I    | Hspa14         | heat shock protein 14                                                            |      |
| NM_027328   | 62     | P        | 134    | P        | 2.30         | I    | Prp31          | PRP31 pre-mRNA processing factor 31 homolog (yeast)                              |      |
| NM_013634   | 167    | P        | 380    | P        | 2.30         | I    | Pparbp         | peroxisome proliferator activated receptor binding protein                       |      |
| NM_133825   | 235    | P        | 541    | P        | 2.30         | I    | D1Erf622e      | DNA segment, Chr 1, ERATO Dta 622, expressed                                     |      |
| NM_013844   | 35     | P        | 83     | P        | 2.30         | I    | Zfp68          | zinc finger protein 68                                                           |      |
| NM_022653   | 33     | A        | 76     | M        | 2.30         | MI   | Tthop1         | thimet oligopeptidase 1                                                          |      |
| NM_010756   | 97     | P        | 217    | P        | 2.30         | I    | Mafg           | y-maf musculoaponeurotic fibrosarcoma oncogene family, protein G (avian          |      |
| NM_023514   | 128    | P        | 273    | P        | 2.30         | I    | Mrp59          | mitochondrial ribosomal protein S9                                               |      |
| NM_025368   | 101    | P        | 233    | P        | 2.30         | I    | Josd2          | Josephin domain containing 2                                                     |      |
| NM_010407   | 179    | P        | 512    | P        | 2.30         | I    | Hck            | hemopoietic cell kinase                                                          |      |
| NM_018869   | 170    | P        | 363    | P        | 2.30         | I    | Gprk5          | G protein-coupled receptor kinase 5                                              |      |
| NM_133358   | 100    | P        | 324    | P        | 2.30         | I    | Zfp617         | zinc finger protein 617                                                          |      |
| NM_182999   | 133    | P        | 300    | P        | 2.30         | I    | Rnf20          | ring finger protein 20                                                           |      |
| NM_011596   | 305    | P        | 771    | P        | 2.30         | I    | Atp6v0a2       | ATPase, H+ transporting, lysosomal V0 subunit A2                                 |      |
| NM_010122   | 142    | P        | 348    | P        | 2.30         | I    | Eif2b4         | eukaryotic translation initiation factor 2B, subunit 4 delta                     |      |
| NM_009283   |        |          |        |          |              |      |                |                                                                                  |      |

| Transcript  | WT     |          | KO     |          | Change KO/WT |      | Gene                                                           |
|-------------|--------|----------|--------|----------|--------------|------|----------------------------------------------------------------|
|             | Signal | Detectio | Signal | Detectio | Fold         | Call |                                                                |
| NM_178668   | 126    | P        | 354    | P        | 2.30         | I    | E430028B21                                                     |
| NM_00103326 | 112    | P        | 243    | P        | 2.30         | I    | Prsc2                                                          |
| NM_013761   | 225    | P        | 533    | P        | 2.30         | I    | Srr                                                            |
| XM_140308   | 106    | P        | 273    | P        | 2.30         | I    | Dcp2                                                           |
| NM_207633   | 203    | P        | 432    | P        | 2.30         | I    | Yip6                                                           |
| NM_172153   | 139    | P        | 337    | P        | 2.30         | I    | A830039H10                                                     |
| NM_025356   | 149    | P        | 2516   | P        | 2.30         | I    | Ube2d3                                                         |
| NM_00102492 | 167    | P        | 349    | P        | 2.30         | I    | Dox49                                                          |
| NM_019987   | 255    | P        | 654    | P        | 2.30         | I    | Ick                                                            |
| XM_88905    | 300    | P        | 695    | P        | 2.30         | I    | Tack3                                                          |
| NM_009838   | 328    | P        | 720    | P        | 2.30         | I    | ---                                                            |
| NM_009838   | 331    | P        | 1961   | P        | 2.30         | I    | Ct61a                                                          |
| NM_00103344 | 199    | P        | 473    | P        | 2.30         | I    | RIKEN cDNA A830039K20                                          |
| NM_002321   | 254    | P        | 478    | P        | 2.30         | MI   | Tug1                                                           |
| XM_00100072 | 111    | P        | 207    | P        | 2.30         | I    | Ors11                                                          |
| NM_019768   | 2239   | P        | 4930   | P        | 2.30         | I    | Morf42                                                         |
| NM_203507   | 51     | P        | 175    | P        | 2.30         | I    | Rwd4a                                                          |
| NM_009178   | 109    | P        | 226    | P        | 2.30         | I    | ST3g4                                                          |
| NM_011750   | 1211   | P        | 2922   | P        | 2.30         | I    | ST1                                                            |
| NM_008298   | 238    | P        | 542    | P        | 2.30         | I    | Dnaj1                                                          |
| NM_019661   | 262    | P        | 597    | P        | 2.30         | I    | Yk6                                                            |
| NM_026759   | 90     | P        | 216    | P        | 2.30         | I    | Mprl13                                                         |
| NM_133948   | 23     | P        | 59     | P        | 2.30         | I    | Psp1                                                           |
| NM_172593   | 197    | P        | 412    | P        | 2.30         | I    | Mier3                                                          |
| ---         | 128    | P        | 287    | P        | 2.30         | I    | RIKEN cDNA 6330564D18                                          |
| NM_139144   | 250    | P        | 554    | P        | 2.30         | I    | Ogt                                                            |
| NM_134095   | 177    | P        | 333    | P        | 2.30         | I    | D15Wsu75e                                                      |
| XM_127961   | 84     | P        | 178    | P        | 2.30         | I    | 4930461P20                                                     |
| NM_173363   | 812    | P        | 2024   | P        | 2.46         | I    | Erf5                                                           |
| NM_009031   | 445    | P        | 1458   | P        | 2.46         | I    | Rbbp7                                                          |
| NM_009196   | 1013   | P        | 2667   | P        | 2.46         | I    | Slc16a1                                                        |
| NM_133815   | 147    | P        | 389    | P        | 2.46         | I    | Lbr                                                            |
| NM_078478   | 2735   | P        | 6943   | P        | 2.46         | I    | Gh1m                                                           |
| NM_133808   | 62     | P        | 211    | P        | 2.46         | I    | Hdlbp                                                          |
| NM_008568   | 131    | P        | 307    | P        | 2.46         | I    | Mcm7                                                           |
| NM_009551   | 838    | P        | 2064   | P        | 2.46         | I    | Za20g2                                                         |
| NM_025364   | 182    | P        | 444    | P        | 2.46         | I    | RIKEN cDNA 1110005A23                                          |
| NM_008300   | 569    | P        | 1486   | P        | 2.46         | I    | Hspa4                                                          |
| NM_013663   | 535    | P        | 1212   | P        | 2.46         | I    | Sfrs3                                                          |
| NM_016764   | 85     | P        | 194    | P        | 2.46         | I    | Prdx4                                                          |
| NM_011655   | 213    | P        | 669    | P        | 2.46         | I    | Tubb5                                                          |
| NM_009794   | 83     | P        | 217    | P        | 2.46         | I    | Capn2                                                          |
| NM_008686   | 283    | P        | 735    | P        | 2.46         | I    | Nfe2l1                                                         |
| NM_134075   | 100    | P        | 290    | P        | 2.46         | I    | Gmpr2                                                          |
| NM_019673   | 101    | P        | 221    | P        | 2.46         | I    | Act16a                                                         |
| NM_017393   | 181    | P        | 445    | P        | 2.46         | I    | Clpp                                                           |
| NM_010123   | 269    | P        | 625    | P        | 2.46         | I    | Eukaryotic translation initiation factor 3, subunit 10 (theta) |
| NM_025683   | 253    | P        | 593    | P        | 2.46         | I    | Rpe                                                            |
| NM_013902   | 82     | P        | 260    | P        | 2.46         | I    | Fkbp3                                                          |
| NM_008831   | 282    | P        | 815    | P        | 2.46         | I    | Phb7                                                           |
| NM_027353   | 46     | P        | 136    | P        | 2.46         | I    | CD2 antigen (cytoplasmic tail) binding protein 2               |
| NM_024478   | 238    | P        | 698    | P        | 2.46         | I    | Grpel1                                                         |
| NM_026068   | 56     | P        | 148    | P        | 2.46         | I    | Med31                                                          |
| NM_130450   | 389    | P        | 984    | P        | 2.46         | I    | Elovl6                                                         |
| NM_009194   | 54     | P        | 121    | P        | 2.46         | I    | Slc12a2                                                        |
| NM_133801   | 175    | P        | 469    | P        | 2.46         | I    | Gtf2f1                                                         |
| NM_011568   | 272    | P        | 755    | P        | 2.46         | I    | Thoc4                                                          |
| NM_011779   | 238    | P        | 614    | P        | 2.46         | I    | Coro1c                                                         |
| NM_029599   | 539    | P        | 1309   | P        | 2.46         | I    | Psmc6                                                          |
| NM_030075   | 128    | P        | 341    | P        | 2.46         | I    | D17H6556E                                                      |
| NM_025318   | 197    | P        | 446    | P        | 2.46         | I    | Tmem93                                                         |
| NM_028312   | 82     | P        | 192    | P        | 2.46         | I    | 2670029G23                                                     |
| NM_053089   | 157    | P        | 389    | P        | 2.46         | I    | Narg1                                                          |
| NM_026425   | 461    | P        | 1124   | P        | 2.46         | I    | Naf5                                                           |
| NM_008921   | 39     | P        | 98     | P        | 2.46         | I    | Prm1                                                           |
| NM_009834   | 96     | P        | 125    | P        | 2.46         | MI   | Adsl                                                           |
| NM_138755   | 28     | A        | 76     | M        | 2.46         | I    | Phf21a                                                         |
| NM_00103522 | 86     | P        | 213    | P        | 2.46         | I    | Xpo1                                                           |
| NM_0010178  | 51     | P        | 130    | P        | 2.46         | I    | Fusp1                                                          |
| NM_025476   | 163    | P        | 437    | P        | 2.46         | I    | 2410005O16                                                     |
| NM_007863   | 22     | A        | 73     | P        | 2.46         | I    | Mpp3                                                           |
| NM_013515   | 225    | P        | 498    | P        | 2.46         | I    | Stom                                                           |
| NM_133905   | 251    | P        | 580    | P        | 2.46         | I    | Papp4                                                          |
| NM_025430   | 371    | P        | 852    | P        | 2.46         | I    | Mprl35                                                         |
| NM_026220   | 112    | P        | 287    | P        | 2.46         | I    | Mtap1                                                          |
| NM_133198   | 198    | P        | 394    | P        | 2.46         | I    | Cstf2                                                          |
| XM_00100460 | 88     | P        | 247    | P        | 2.46         | I    | Morc3                                                          |
| NM_178610   | 63     | P        | 166    | P        | 2.46         | I    | Krr1                                                           |
| NM_023554   | 426    | P        | 1002   | P        | 2.46         | I    | Ng7                                                            |
| NM_018785   | 28     | P        | 76     | P        | 2.46         | I    | Prpf40a                                                        |
| NM_0010020  | 183    | P        | 522    | P        | 2.46         | I    | Lmna                                                           |
| NM_011396   | 157    | P        | 402    | P        | 2.46         | I    | Slc22a5                                                        |
| NM_013634   | 117    | P        | 314    | P        | 2.46         | I    | Pparbp                                                         |
| NM_023647   | 715    | P        | 1670   | P        | 2.46         | I    | Nipa2                                                          |
| NM_009372   | 39     | P        | 100    | P        | 2.46         | I    | Igf1                                                           |
| NM_008917   | 220    | P        | 637    | P        | 2.46         | I    | Ppt1                                                           |

| Transcript | WT     |          | KO     |          | Change KO/WT |      | Gene       |
|------------|--------|----------|--------|----------|--------------|------|------------|
|            | Signal | Detectio | Signal | Detectio | Fold         | Call |            |
| NM_011304  | 93     | P        | 228    | P        | 2.46         | I    | Ruvb2      |
| NM_031373  | 102    | P        | 223    | P        | 2.46         | I    | Ogr        |
| NM_018886  | 181    | P        | 469    | P        | 2.46         | I    | Lgals8     |
| NM_052993  | 98     | P        | 274    | P        | 2.46         | I    | Ctgal1     |
| NM_013716  | 183    | P        | 487    | P        | 2.46         | I    | RP23-336J1 |
| NM_010286  | 638    | P        | 1596   | P        | 2.46         | I    | Gda        |
| NM_028095  | 300    | P        | 804    | P        | 2.46         | I    | Snrpd3     |
| NM_011568  | 152    | P        | 411    | P        | 2.46         | I    | Thoc4      |
| NM_016805  | 525    | P        | 1335   | P        | 2.46         | I    | Hnrpu      |
| NM_030259  | 223    | P        | 566    | P        | 2.46         | I    | BC003324   |
| NM_025283  | 308    | P        | 737    | P        | 2.46         | I    | Prs3       |
| NM_007917  | 78     | P        | 179    | P        | 2.46         | I    | Erf4e      |
| NM_028653  | 79     | P        | 208    | P        | 2.46         | I    | Rpa1       |
| NM_025934  | 39     | P        | 111    | P        | 2.46         | I    | Rick2      |
| NM_011562  | 18     | P        | 59     | P        | 2.46         | I    | Tcof1      |
| NM_148094  | 41     | P        | 129    | P        | 2.46         | I    | Fads1      |
| NM_0010038 | 253    | P        | 596    | P        | 2.46         | I    | Tardbp     |
| NM_023603  | 197    | P        | 477    | P        | 2.46         | I    | Sfpq       |
| NM_145507  | 151    | P        | 269    | P        | 2.46         | I    | Dars       |
| NM_148083  | 46     | P        | 132    | P        | 2.46         | I    | Sfrs7      |
| NM_203507  | 40     | P        | 96     | P        | 2.46         | I    | Rwd4a      |
| NM_027002  | 66     | P        | 116    | P        | 2.46         | I    | Poir2d     |
| NM_145533  | 139    | P        | 359    | P        | 2.46         | I    | Smox       |
| NM_026053  | 37     | P        | 94     | P        | 2.46         | I    | Gemin6     |
| NM_145480  | 30     | P        | 91     | P        | 2.46         | I    | Rfc4       |
| NM_172054  | 237    | P        | 584    | P        | 2.46         | I    | Txdnc9     |
| XM_128528  | 175    | P        | 327    | P        | 2.46         | I    | BC003965   |
| NM_019667  | 478    | P        | 1269   | P        | 2.46         | I    | Psmas5     |
| NM_027220  | 1122   | P        | 2523   | P        | 2.46         | I    | Prss32     |
| NM_144895  | 65     | P        | 193    | P        | 2.46         | I    | Spg20      |
| NM_144895  | 147    | P        | 313    | P        | 2.46         | I    | Spg20      |
| NM_145381  | 155    | P        | 434    | P        | 2.46         | I    | Lactb2     |
| NM_028521  | 108    | P        | 255    | P        | 2.46         | MI   | Phospho2   |
| NM_009333  | 68     | P        | 183    | P        | 2.46         | I    | Tcf7l2     |
| NM_009884  | 379    | P        | 1005   | P        | 2.46         | I    | Cebpg      |
| NM_027296  | 60     | P        | 190    | P        | 2.46         | MI   | Irfm1      |
| NM_011590  | 492    | P        | 1274   | P        | 2.46         | I    | Timm17a    |
| NM_010380  | 103    | P        | 490    | P        | 2.46         | I    | H2-D1      |
| NM_198006  | 84     | P        | 204    | P        | 2.46         | I    | 6330578E17 |
| NM_013876  | 321    | P        | 889    | P        | 2.46         | I    | Rnf11      |
| NM_009546  | 91     | P        | 265    | P        | 2.46         | I    | Trim25     |
| NM_0010250 | 136    | P        | 389    | P        | 2.46         | I    | Atf2       |
| NM_144829  | 232    | P        | 543    | P        | 2.46         | I    | Arhgap17   |
| NM_212484  | 184    | P        | 418    | P        | 2.46         | I    | Cnot6      |
| NM_144874  | 122    | P        | 287    | P        | 2.46         | I    | Cox15      |
| NM_175121  | 373    | P        | 929    | P        | 2.46         | I    | Slc38a2    |
| NM_008468  | 73     | P        | 192    | P        | 2.46         | I    | Kpna6      |
| NM_172703  | 178    | P        | 394    | P        | 2.46         | I    | Eif4g3     |
| NM_028399  | 69     | P        | 168    | P        | 2.46         | I    | Ccnt2      |
| NM_011410  | 78     | A        | 164    | P        | 2.46         | I    | Slnf4      |
| NM_019927  | 124    | P        | 285    | P        | 2.46         | I    | Arh1       |
| NM_009722  | 1098   | P        | 2596   | P        | 2.46         | I    | Atp2a2     |
| NM_010431  | 802    | P        | 1796   | P        | 2.46         | I    | Hif1a      |
| NM_019817  | 36     | P        | 73     | P        | 2.46         | I    | Zfp260     |
| NM_028358  | 246    | P        | 758    | P        | 2.46         | I    | Ssbp1      |
| NM_030093  | 94     | A        | 214    | P        | 2.46         | I    | 330000T02  |
| NM_026115  | 63     | P        | 140    | P        | 2.46         | I    | Hat1       |
| NM_028273  | 93     | P        | 205    | P        | 2.46         | I    | Pgam5      |
| NM_027275  | 92     | P        | 247    | P        | 2.46         | I    | 2810422B04 |
| XM_0010006 | 195    | P        | 446    | P        | 2.46         | I    | 130000101R |
| NM_0010387 | 138    | P        | 364    | P        | 2.46         | I    | Cdc42se1   |
| NM_033320  | 140    | P        | 302    | P        | 2.46         | I    | Glc3e      |
| XM_0010013 | 387    | P        | 824    | P        | 2.46         | I    | Hnrpa0     |
| NM_145215  | 316    | P        | 657    | P        | 2.46         | I    | Abhd11     |
| NM_134156  | 105    | P        | 272    | P        | 2.46         | I    | Actn1      |
| ---        | 119    | P        | 247    | P        | 2.46         | I    | ---        |
| NM_027096  | 487    | P        | 1227   | P        | 2.46         | I    | Pre4       |
| NM_009333  | 279    | P        | 671    | P        | 2.46         | I    | Tcf7l2     |
| NM_0010391 | 155    | P        | 372    | P        | 2.46         | I    | Hnrpa1     |
| NM_027834  | 65     | P        | 169    | P        | 2.46         | I    | 9130008F23 |
| NM_0010400 | 109    | P        | 266    | P        | 2.46         | I    | Sco1       |
| NM_016804  | 414    | P        | 1134   | P        | 2.46         | I    | Mtx2       |
| NM_021346  | 71     | P        | 92     | P        | 2.46         | I    | Zfp318     |
| NM_026102  | 37     | P        | 183    | P        | 2.46         | I    | Daam1      |
| NM_016881  | 246    | P        | 595    | P        | 2.46         | I    | Pmm2       |
| NM_024258  | 317    | P        | 732    | P        | 2.46         | I    | Usp16      |
| NM_0010395 | 347    | P        | 752    | P        | 2.46         | I    | Dnm2       |
| NM_029775  | 119    | P        | 280    | P        | 2.46         | I    | Dcun1d5    |
| NM_033080  | 232    | P        | 613    | P        | 2.46         | I    | Nudt19     |
| NM_008722  | 335    | P        | 761    | P        | 2.46         | I    | Npm1       |
| NM_009373  | 896    | P        | 1916   | P        | 2.46         | I    | Tgm2       |
| XM_0010024 | 328    | P        | 712    | P        | 2.46         | I    | D19Wsu12e  |
| NM_008515  | 1095   | P        | 2338   | P        | 2.46         | I    | Lrrfp1     |
| XM_0010006 | 30     | P        | 70     | P        | 2.46         | MI   | Cdc27      |
| NM_175124  | 25     | A        | 71     | P        | 2.46         | MI   | Lrrc28     |
| NM_018747  | 219    | P        | 547    | P        | 2.46         | I    | Akap7      |



| Transcript     | WT     |            | KO     |            | Change KO/WT |      | Symbol                     | Title                                                                                    | Gene |
|----------------|--------|------------|--------|------------|--------------|------|----------------------------|------------------------------------------------------------------------------------------|------|
|                | Signal | Detectable | Signal | Detectable | Fold         | Call |                            |                                                                                          |      |
| NM_146041      | 1181   | P          | 2953   | P          | 2.46         | I    | Gmcs                       | GDP-mannose 4, 6-dehydratase                                                             |      |
| —              | 147    | P          | 348    | P          | 2.46         | I    | B230308N11                 | RIKEN cDNA B230308N11 gene                                                               |      |
| NM_198023      | 143    | P          | 378    | P          | 2.46         | I    | Rcor1                      | REST corepressor 1                                                                       |      |
| NM_175312      | 28     | P          | 79     | P          | 2.46         | I    | B630005N14                 | RIKEN cDNA B630005N14 gene                                                               |      |
| NM_00103919    | 36     | P          | 103    | P          | 2.46         | I    | Cd44                       | CD44 antigen                                                                             |      |
| NM_00102460    | 78     | P          | 176    | P          | 2.46         | I    | Ankrd28                    | ankyrin repeat domain 28                                                                 |      |
| NM_175294      | 45     | P          | 123    | P          | 2.46         | I    | Nucks1                     | nuclear ccase kinase and cyclin-dependent kinase substrate 1                             |      |
| NM_00100444    | 446    | P          | 1097   | P          | 2.46         | I    | Wapal                      | wings apart-like homolog (Drosophila)                                                    |      |
| XM_130548 //   | 49     | P          | 126    | P          | 2.46         | I    | B21011J03F                 | RIKEN cDNA B21011J03 gene                                                                |      |
| NM_00103525    | 89     | P          | 141    | P          | 2.46         | MI   | Srs8                       | splicing factor, arginine/serine-rich 8                                                  |      |
| NM_011119      | 133    | P          | 425    | P          | 2.46         | I    | P2294                      | proliferation-associated 234 gene                                                        |      |
| NM_00103386    | 179    | P          | 462    | P          | 2.46         | I    | B210482C21                 | RIKEN cDNA B210482C21 gene                                                               |      |
| NM_008433      | 88     | P          | 159    | P          | 2.46         | I    | Kcnk4                      | potassium intermediate/small conductance calcium-activated channel, subfamily D member 4 |      |
| XM_89805 //    | 508    | P          | 1079   | P          | 2.46         | I    | Tack3                      | TAO kinase 3                                                                             |      |
| NM_009579      | 212    | P          | 627    | P          | 2.46         | I    | Sic30a1                    | solute carrier family 30 (zinc transporter), member 1                                    |      |
| NM_172887      | 71     | P          | 194    | P          | 2.46         | MI   | Cag3                       | coenzyme Q3 homolog, methyltransferase (yeast)                                           |      |
| —              | 96     | P          | 240    | P          | 2.46         | I    | 1110008H02                 | RIKEN cDNA 1110008H02 gene                                                               |      |
| NM_178665      | 439    | P          | 1057   | P          | 2.46         | I    | Lpp                        | LIM domain containing preferred translocation partner in lipoma                          |      |
| NM_178925      | 73     | P          | 179    | P          | 2.46         | I    | Nsun3                      | NOL1/NOP2/Sun domain family 3                                                            |      |
| NM_175341 //   | 174    | P          | 383    | P          | 2.46         | I    | Mbnl2                      | muscleblind-like 2                                                                       |      |
| NM_138592      | 107    | P          | 236    | P          | 2.46         | I    | Usp39                      | ubiquitin specific peptidase 39                                                          |      |
| NM_010308      | 57     | P          | 151    | P          | 2.46         | I    | Gnai3                      | guanine nucleotide binding protein, alpha inhibiting 3                                   |      |
| NM_179203      | 142    | P          | 303    | P          | 2.46         | I    | Atad3a                     | ATPase family, AAA domain containing 3A                                                  |      |
| NM_198023      | 96     | P          | 253    | P          | 2.46         | I    | Rcor1                      | REST corepressor 1                                                                       |      |
| NM_007874      | 86     | P          | 242    | P          | 2.46         | I    | Reep5                      | receptor accessory protein 5                                                             |      |
| XM_00100258 // | 162    | P          | 365    | P          | 2.46         | I    | B210409H07                 | RIKEN cDNA B210409H07 gene                                                               |      |
| NM_178665      | 80     | P          | 192    | P          | 2.46         | I    | Lpp                        | LIM domain containing preferred translocation partner in lipoma                          |      |
| NM_133242      | 76     | P          | 222    | P          | 2.46         | I    | Rncp2                      | RNA-binding region (RNP1, RRM) containing 2                                              |      |
| NM_145859      | 222    | P          | 457    | P          | 2.46         | I    | Mal2a                      | methionine adenosyltransferase II, alpha                                                 |      |
| XM_00100258 // | 119    | P          | 305    | P          | 2.46         | I    | Thrap1                     | thyroid hormone receptor associated protein 1                                            |      |
| NM_012024      | 57     | P          | 148    | P          | 2.46         | I    | Ppp2r5e                    | Protein phosphatase 2, regulatory subunit B (B56), epsilon isoform                       |      |
| NM_026532 //   | 146    | P          | 355    | P          | 2.46         | I    | Nutt2 // LOC               | nuclear transport factor 2 // similar to Nuclear Transport factor 2 (NTF-2)              |      |
| NM_00103939    | 124    | P          | 351    | P          | 2.46         | I    | Pkg                        | Protein kinase inhibitor, gamma                                                          |      |
| NM_172745 //   | 162    | P          | 471    | P          | 2.46         | I    | Tufm // LOC                | Tu translation elongation factor, mitochondrial // similar to Tu translation             |      |
| NM_009836      | 261    | P          | 687    | P          | 2.46         | I    | Cct3                       | chaperonin subunit 3 (gamma)                                                             |      |
| NM_010688      | 155    | P          | 386    | P          | 2.46         | I    | Laspl                      | LIM and SH3 protein 1                                                                    |      |
| NM_016682      | 296    | P          | 650    | P          | 2.46         | I    | Uble1b                     | ubiquitin-like 1 (sentrin) activating enzyme E1B                                         |      |
| NM_024287      | 519    | P          | 1358   | P          | 2.46         | I    | Rab6                       | RAB6, member RAS oncogene family                                                         |      |
| NM_008062      | 499    | P          | 1259   | P          | 2.46         | I    | G6pdx                      | glucose-6-phosphate dehydrogenase X-linked                                               |      |
| NM_008831      | 117    | P          | 254    | P          | 2.46         | I    | Phb                        | prohibitin                                                                               |      |
| NM_026030      | 125    | P          | 263    | P          | 2.46         | I    | Eif2s2                     | eukaryotic translation initiation factor 2, subunit 2 (beta)                             |      |
| NM_026632      | 101    | P          | 236    | P          | 2.46         | I    | Rpa3                       | replication protein A3                                                                   |      |
| NM_007381      | 1730   | P          | 4171   | P          | 2.46         | I    | Acadl                      | acyl-Coenzyme A dehydrogenase, long-chain                                                |      |
| NM_023331      | 269    | P          | 645    | P          | 2.46         | I    | Mrp146                     | mitochondrial ribosomal protein L46                                                      |      |
| NM_011699      | 91     | P          | 218    | P          | 2.46         | I    | Lin7c                      | lin-7 homolog C (C. elegans)                                                             |      |
| NM_026220      | 195    | P          | 437    | P          | 2.46         | I    | Mfap1                      | microfibrillar-associated protein 1                                                      |      |
| NM_026220      | 222    | P          | 609    | P          | 2.46         | I    | Mfap1                      | microfibrillar-associated protein 1                                                      |      |
| NM_010810      | 177    | P          | 428    | P          | 2.46         | I    | Mmp7                       | matrix metalloproteinase 7                                                               |      |
| NM_133808      | 97     | P          | 310    | P          | 2.46         | I    | Hdlbp                      | high density lipoprotein (HDL) binding protein                                           |      |
| NM_021305      | 30     | P          | 86     | P          | 2.46         | I    | Sec61a2                    | Sec61, alpha subunit 2 (S. cerevisiae)                                                   |      |
| NM_019657      | 351    | P          | 920    | P          | 2.46         | I    | Hsd17b12                   | hydroxysteroid (17-beta) dehydrogenase 12                                                |      |
| NM_018785      | 109    | P          | 242    | P          | 2.46         | I    | Prpf40a                    | PRPF40 pre-mRNA processing factor 40 homolog A (yeast)                                   |      |
| NM_018821      | 96     | P          | 143    | P          | 2.46         | I    | Soc6                       | suppressor of cytokine signaling 6                                                       |      |
| NM_011408      | 284    | P          | 756    | P          | 2.46         | I    | Sfrn2                      | sclafoten 2                                                                              |      |
| NM_013454      | 39     | P          | 117    | P          | 2.46         | MI   | Abca1                      | ATP-binding cassette, sub-family A (ABC1), member 1                                      |      |
| NM_008197      | 524    | P          | 1467   | P          | 2.46         | I    | Htt0                       | HT histone family, member 0                                                              |      |
| NM_013585      | 790    | P          | 2274   | P          | 2.46         | I    | Psmb9                      | proteasome (prosome, macropain) subunit, beta type 9 (large multifunctional)             |      |
| NM_025824      | 573    | P          | 1477   | P          | 2.46         | I    | Bzw1                       | basic leucine zipper and W2 domains 1                                                    |      |
| NM_027000      | 65     | P          | 168    | P          | 2.46         | MI   | Gtppp4                     | GTP binding protein 4                                                                    |      |
| NM_007917 //   | 353    | P          | 962    | P          | 2.46         | I    | Eif4e // LOC               | eukaryotic translation initiation factor 4E // hypothetical LOC630527                    |      |
| —              | 102    | P          | 231    | P          | 2.46         | I    | —                          | —                                                                                        |      |
| NM_025564      | 88     | P          | 182    | P          | 2.46         | MI   | 2010012C16                 | RIKEN cDNA 2010012C16 gene                                                               |      |
| NM_00103906    | 97     | P          | 164    | P          | 2.46         | I    | Mrp11                      | mitochondrial ribosomal protein L11                                                      |      |
| NM_018868      | 37     | P          | 130    | P          | 2.46         | I    | Ndc5                       | nuclear protein 5                                                                        |      |
| NM_008989      | 312    | P          | 782    | P          | 2.46         | I    | Zfiam                      | zinc finger protein, multiple type 1                                                     |      |
| NM_010890      | 78     | P          | 151    | P          | 2.46         | I    | Ncd34                      | neural precursor cell expressed, developmentally down-regulated gene 4                   |      |
| NM_026396      | 150    | P          | 369    | P          | 2.46         | I    | Bvdc2                      | brix domain containing 2                                                                 |      |
| NM_139149      | 215    | P          | 491    | P          | 2.46         | I    | Fus                        | fusion, derived from (12:16) malignant liposarcoma (human)                               |      |
| NM_00101588    | 169    | P          | 347    | P          | 2.46         | I    | Iaf9                       | IAF9 RNA polymerase II, TATA box binding protein (TBP)-associated                        |      |
| NM_145987      | 236    | P          | 490    | P          | 2.46         | I    | BC025833                   | cDNA sequence BC025833                                                                   |      |
| NM_024282      | 154    | P          | 316    | P          | 2.46         | I    | RIKEN cDNA 5830417C01 gene |                                                                                          |      |
| NM_009884      | 282    | P          | 610    | P          | 2.46         | I    | Cebpq                      | CCAAT/enhancer binding protein (C/EBP), gamma                                            |      |
| NM_031403      | 82     | P          | 227    | P          | 2.46         | I    | Dbp1                       | debranching enzyme homolog 1 (S. cerevisiae)                                             |      |
| XM_140497 //   | 29     | A          | 77     | P          | 2.46         | I    | BC024969                   | cDNA sequence BC024969                                                                   |      |
| NM_013876      | 412    | P          | 858    | P          | 2.46         | I    | RNF11                      | ring finger protein 11                                                                   |      |
| NM_178645      | 97     | P          | 222    | P          | 2.46         | I    | Blmh                       | bleomycin hydrolase                                                                      |      |
| NM_028696      | 75     | P          | 197    | P          | 2.46         | I    | 5830411E10                 | RIKEN cDNA 5830411E10 gene                                                               |      |
| NM_172252      | 166    | P          | 396    | P          | 2.46         | I    | Mrp12                      | mitochondrial ribosomal protein L21                                                      |      |
| NM_148130 //   | 128    | P          | 270    | P          | 2.46         | I    | Hnrp3                      | heterogeneous nuclear ribonucleoprotein A3                                               |      |
| NM_025645      | 47     | P          | 147    | P          | 2.46         | I    | Wdr57                      | WD repeat domain 57 (U5 snRNP specific)                                                  |      |
| NM_026157      | 156    | P          | 384    | P          | 2.46         | I    | Papd1                      | PAP associated domain containing 1                                                       |      |
| NM_019830      | 81     | P          | 236    | P          | 2.46         | I    | Prrt1                      | protein arginine N-methyltransferase 1                                                   |      |
| —              | 451    | P          | 1122   | P          | 2.46         | I    | —                          | —                                                                                        |      |
| XM_910498 //   | 92     | P          | 232    | P          | 2.46         | I    | 2700029M09                 | RIKEN cDNA 2700029M09 gene                                                               |      |
| NM_027314      | 497    | P          | 1330   | P          | 2.46         | I    | 387B1                      | membrane-associated ring finger (C3HC4) 5                                                |      |
| NM_026542      | 812    | P          | 1980   | P          | 2.46         | I    | D11Erd333e                 | DNA segment, Chr 11, ERATO D01 333, expressed                                            |      |

| Transcript   | WT     |            | KO     |            | Change KO/WT |      | Symbol       | Title                                                                                  | Gene |
|--------------|--------|------------|--------|------------|--------------|------|--------------|----------------------------------------------------------------------------------------|------|
|              | Signal | Detectable | Signal | Detectable | Fold         | Call |              |                                                                                        |      |
| NM_009551    | 50     | P          | 124    | P          | 2.46         | I    | Za20d2       | zinc finger, A20 domain containing 2                                                   |      |
| NM_026792    | 75     | P          | 191    | P          | 2.46         | I    | Agpat5       | 1-acylglycerol-3-phosphate O-acyltransferase 5 (lysophosphatidic acid acyltransferase) |      |
| NM_019702    | 86     | P          | 210    | P          | 2.46         | I    | Hbs1l        | Hbs1-like (S. cerevisiae)                                                              |      |
| NM_019472    | 98     | P          | 226    | P          | 2.46         | I    | Myo10        | myosin X                                                                               |      |
| XM_00100068  | 86     | P          | 212    | P          | 2.46         | I    | Cdc27        | cell division cycle 27 homolog (S. cerevisiae)                                         |      |
| NM_026476    | 207    | P          | 510    | P          | 2.46         | I    | 2610101N10   | RIKEN cDNA 2610101N10 gene                                                             |      |
| NM_013663    | 178    | P          | 416    | P          | 2.46         | I    | Srs3         | splicing factor, arginine/serine-rich 3 (SRP20)                                        |      |
| NM_173382    | 59     | P          | 146    | P          | 2.46         | I    | 2810046L04H  | RIKEN cDNA 2810046L04H gene                                                            |      |
| NM_173325    | 64     | P          | 173    | P          | 2.46         | I    | Tsr1         | TSR1, 20S rRNA accumulation, homolog (yeast)                                           |      |
| NM_012000    | 61     | P          | 122    | P          | 2.46         | I    | Cln8         | ceroid-lipofuscinosis, neuronal 8                                                      |      |
| NM_133750    | 79     | P          | 158    | P          | 2.46         | I    | Tpr          | translocated promoter region                                                           |      |
| NM_009031    | 814    | P          | 1855   | P          | 2.46         | I    | Rbbp7        | retinoblastoma binding protein 7                                                       |      |
| NM_025546    | 52     | P          | 144    | P          | 2.46         | I    | Rsl1d1       | ribosomal L1 domain containing 1                                                       |      |
| NM_179203    | 84     | P          | 228    | P          | 2.46         | I    | Atad3a       | ATPase family, AAA domain containing 3A                                                |      |
| XM_00100094  | 40     | P          | 763    | P          | 2.46         | I    | 1500005K14H  | RIKEN cDNA 1500005K14 gene                                                             |      |
| NM_025384 // | 41     | P          | 134    | P          | 2.46         | I    | 1110005A23H  | RIKEN cDNA 1110005A23H gene // similar to cytokine induced protein 29 I                |      |
| NM_0010332   | 399    | P          | 792    | P          | 2.46         | I    | Trim40       | tripartite motif-containing 40                                                         |      |
| NM_00101233  | 327    | P          | 749    | P          | 2.46         | I    | Ptpra        | protein tyrosine phosphatase-like (proline instead of catalytic arginine), member 1    |      |
| NM_026620    | 129    | P          | 237    | P          | 2.46         | I    | 2610510H03H  | RIKEN cDNA 2610510H03H gene                                                            |      |
| NM_133726    | 98     | P          | 262    | P          | 2.46         | I    | Slit3        | suppression of tumorigenicity 13                                                       |      |
| NM_133978    | 26     | P          | 67     | P          | 2.46         | I    | Cmtm7        | CKLF-like MARVEL transmembrane domain containing 7                                     |      |
| XR_002351 // | 89     | P          | 212    | P          | 2.46         | I    | 2700089E24H  | RIKEN cDNA 2700089E24H gene                                                            |      |
| NM_025665    | 624    | P          | 1604   | P          | 2.46         | I    | 2610209M04   | RIKEN cDNA 2610209M04 gene                                                             |      |
| NM_009677    | 91     | P          | 234    | P          | 2.46         | I    | Ap1g1        | adaptor protein complex AP-1, gamma 1 subunit                                          |      |
| NM_010880    | 484    | P          | 1354   | P          | 2.46         | I    | Ncl          | nucleolin                                                                              |      |
| NM_010655 // | 577    | P          | 1509   | P          | 2.46         | I    | Kpna2 // LOC | karyopherin (importin) alpha 2 // similar to Importin alpha-2 subunit (Karyo           |      |
| NM_078478    | 1744   | P          | 4412   | P          | 2.46         | I    | Ghitm        | growth hormone inducible transmembrane protein                                         |      |
| NM_016737    | 116    | P          | 326    | P          | 2.46         | I    | Stip1        | stress-induced phosphoprotein 1                                                        |      |
| NM_026106    | 58     | P          | 129    | P          | 2.46         | I    | Dr1          | down-regulator of transcription 1                                                      |      |
| NM_013663    | 103    | P          | 231    | P          | 2.46         | I    | Srs3         | splicing factor, arginine/serine-rich 3 (SRP20)                                        |      |
| NM_026383    | 387    | P          | 834    | P          | 2.46         | I    | Pnrc2        | proline-rich nuclear receptor coactivator 2                                            |      |
| NM_133807    | 759    | P          | 2044   | P          | 2.46         | I    | Lrrc59       | leucine rich repeat containing 59                                                      |      |
| NM_008567    | 107    | P          | 259    | P          | 2.46         | I    | Mcm6         | minichromosome maintenance deficient 6 (MIS5 homolog, S. pombe) (S. c                  |      |
| NM_008302    | 577    | P          | 1594   | P          | 2.46         | I    | Hsp90ab1     | heat shock protein 90kDa alpha (cytosolic), class B member 1                           |      |
| NM_019748    | 323    | P          | 848    | P          | 2.46         | I    | Uble1a       | ubiquitin-like 1 (sentrin) activating enzyme E1A                                       |      |



| Transcript   | WT     |          | KO     |          | Change KO/WT |      | Symbol         | Title                                                                         | Gene |
|--------------|--------|----------|--------|----------|--------------|------|----------------|-------------------------------------------------------------------------------|------|
|              | Signal | Detectio | Signal | Detectio | Fold         | Call |                |                                                                               |      |
| NM_028233    | 93     | P        | 242    | P        | 2.64         | I    | Lrpprc         | leucine-rich PPR-motif containing                                             |      |
| NM_145632    | 75     | P        | 242    | P        | 2.64         | I    | Pof12n         | polymerase (RNA) II (DNA directed) polypeptide H                              |      |
| NM_144826    | 63     | P        | 156    | P        | 2.64         | I    | Utp6           | UTP6, small subunit (SSU) processome component, homolog (yeast)               |      |
| NM_028876    | 34     | P        | 77     | P        | 2.64         | I    | I med5         | transmembrane emp24 protein transport domain containing 5                     |      |
| XM_358357 // | 74     | P        | 191    | P        | 2.64         | I    | 9030416H16     | RIKEN cDNA 9030416H16 gene                                                    |      |
| NM_011743    | 27     | A        | 73     | P        | 2.64         | I    | Zfp106         | zinc finger protein 106                                                       |      |
| NM_009338 // | 82     | P        | 174    | P        | 2.64         | I    | Acat2 // Acat  | acetyl-Coenzyme A acetyltransferase 2 // acetyl-Coenzyme A acetyltransferase  |      |
| NM_145506    | 45     | P        | 94     | P        | 2.64         | I    | Epb4.115       | erythrocyte protein band 4.1-like 5                                           |      |
| NM_144808    | 109    | P        | 293    | P        | 2.64         | I    | Slc39a14       | solute carrier family 39 (zinc transporter), member 14                        |      |
| NM_010773    | 144    | P        | 372    | P        | 2.64         | I    | Mbd2           | methyl-CpG binding domain protein 2                                           |      |
| NM_011400    | 32     | P        | 93     | P        | 2.64         | I    | Slc2a1         | solute carrier family 2 (facilitated glucose transporter), member 1           |      |
| NM_023722    | 39     | P        | 79     | P        | 2.64         | I    | Itpin          | timeless interacting protein                                                  |      |
| NM_029804    | 170    | P        | 403    | P        | 2.64         | I    | Hnrpm          | heterogeneous nuclear ribonucleoprotein M                                     |      |
| NM_181470    | 212    | P        | 498    | P        | 2.64         | I    | Ltv1           | LTV1 homolog (S. cerevisiae)                                                  |      |
| NM_175224    | 89     | P        | 228    | P        | 2.64         | I    | Metap1         | methylonyl aminopeptidase 1                                                   |      |
| NM_172877    | 218    | P        | 493    | P        | 2.64         | I    | Ythd3f3        | YTH domain family 3                                                           |      |
| NM_023871    | 337    | P        | 852    | P        | 2.64         | I    | Set            | SET translocation                                                             |      |
| NM_00102516  | 73     | P        | 174    | P        | 2.64         | I    | Ccd93          | coiled-coil domain containing 93                                              |      |
| NM_00100533  | 73     | P        | 178    | P        | 2.64         | I    | Etf4g1         | eukaryotic translation initiation factor 4, gamma 1                           |      |
| NM_144958    | 1400   | P        | 3878   | P        | 2.64         | I    | Etf4a1         | eukaryotic translation initiation factor 4A1                                  |      |
| NM_028871    | 134    | P        | 340    | P        | 2.64         | I    | Hnrpr          | heterogeneous nuclear ribonucleoprotein R                                     |      |
| XM_907304 // | 33     | P        | 124    | P        | 2.64         | I    | Abcb7          | ATP-binding cassette, sub-family B (MDR/TAP), member 7                        |      |
| NM_011358    | 423    | P        | 1348   | P        | 2.64         | I    | Sfrs2          | splicing factor, arginine/serine-rich 2 (SC-35)                               |      |
| NM_022314    | 379    | P        | 992    | P        | 2.64         | I    | Tpm3           | tropomyosin 3, gamma                                                          |      |
| NM_011768    | 31     | P        | 92     | P        | 2.64         | I    | Zfx            | zinc finger protein X-linked                                                  |      |
| XM_97471     | 743    | P        | 1877   | P        | 2.64         | I    | Z310043N10     | RIKEN cDNA Z310043N10 gene                                                    |      |
| NM_173374    | 64     | P        | 161    | P        | 2.64         | I    | Sfrs1          | splicing factor, arginine/serine-rich 1 (ASF/SF2)                             |      |
| NM_152812    | 100    | P        | 213    | P        | 2.64         | I    | Otdub6b        | OTU domain containing 6B                                                      |      |
| NM_028276    | 40     | P        | 111    | P        | 2.64         | I    | Aasdhppt       | aminoadipate-semialdehyde dehydrogenase-phosphopantetheinyl transferase       |      |
| NM_027314    | 1243   | P        | 2958   | P        | 2.64         | I    | 38781          | membrane-associated ring finger (C3HC4) 5                                     |      |
| NM_00102539  | 110    | P        | 181    | P        | 2.64         | I    | Bclaf1         | BCL2-associated transcription factor 1                                        |      |
| XM_619008 // | 64     | P        | 157    | P        | 2.64         | I    | 2600011C06     | RIKEN cDNA 2600011C06 gene                                                    |      |
| NM_172712    | 79     | P        | 270    | P        | 2.64         | I    | Ube112         | ubiquitin-activating enzyme E1-like 2                                         |      |
| NM_028108    | 40     | P        | 129    | P        | 2.64         | I    | Mak3           | Mak3 homolog (S. cerevisiae)                                                  |      |
| NM_028993    | 63     | P        | 154    | P        | 2.64         | I    | Ddah1          | dimethylarginine dimethylaminohydrolase 1                                     |      |
| NM_009333    | 75     | P        | 229    | P        | 2.64         | I    | Tcf12          | transcription factor 7-like 2, T-cell specific, HMG-box                       |      |
| NM_025408    | 58     | P        | 129    | P        | 2.64         | I    | Phca           | phytylceramide, alkaline                                                      |      |
| NM_176835    | 112    | P        | 257    | P        | 2.64         | I    | Z810451A06     | RIKEN cDNA Z810451A06 gene                                                    |      |
| NM_028967    | 201    | P        | 524    | P        | 2.64         | I    | Batf2          | basic leucine zipper transcription factor, ATF-like 2                         |      |
| NM_026276    | 51     | P        | 157    | P        | 2.64         | I    | Aasdhppt       | aminoadipate-semialdehyde dehydrogenase-phosphopantetheinyl transferase       |      |
| NM_028487    | 123    | P        | 407    | P        | 2.64         | I    | Gppb1          | GC-rich promoter binding protein 1                                            |      |
| NM_020012    | 54     | P        | 141    | P        | 2.64         | I    | Rnf14          | ring finger protein 14                                                        |      |
| NM_153587    | 20     | A        | 63     | P        | 2.64         | I    | Rps6ka5        | ribosomal protein S6 kinase, polypeptide 5                                    |      |
| NM_00103969  | 35     | P        | 76     | P        | 2.64         | I    | Arhgap12       | Rho GTPase activating protein 12                                              |      |
| XR_005074    | 405    | P        | 1059   | P        | 2.64         | I    | LOC877168      | hypothetical protein LOC877168                                                |      |
| NM_009691    | 92     | P        | 245    | P        | 2.64         | I    | Aplp2          | amyloid beta (A4) precursor-like protein 2                                    |      |
| NM_175411 // | 166    | P        | 406    | P        | 2.64         | I    | C030004A17     | RIKEN cDNA C030004A17 gene                                                    |      |
| XM_00100254  | 69     | P        | 168    | P        | 2.64         | I    | Irf2b2p2 // LO | interferon regulatory factor 2 binding protein 2 // similar to interferon reg |      |
| NM_180600    | 45     | P        | 148    | P        | 2.64         | I    | Ube2g2         | ubiquitin-conjugating enzyme E2 (putative) 2                                  |      |
| NM_176838    | 74     | P        | 201    | P        | 2.64         | I    | Rbm35b         | RNA binding motif protein 35b                                                 |      |
| NM_016806 // | 611    | P        | 1553   | P        | 2.64         | I    | Hnrpa2b1       | heterogeneous nuclear ribonucleoprotein A2/B1                                 |      |
| NM_016739    | 65     | P        | 170    | P        | 2.64         | I    | Gpiap1         | GPI-anchored membrane protein 1                                               |      |
| NM_009438    | 280    | P        | 762    | P        | 2.64         | I    | Rpl13a         | ribosomal protein L13a                                                        |      |
| NM_177474    | 141    | P        | 500    | P        | 2.64         | I    | D19bwg1357     | DNA segment, Chr 19, Brigham & Women's Genetics 1357 expressed                |      |
| NM_013763    | 62     | P        | 125    | P        | 2.64         | I    | Tb12           | transducin (beta)-like 2                                                      |      |
| XM_981031 // | 62     | P        | 171    | P        | 2.64         | I    | BC049349       | cDNA sequence BC049349                                                        |      |
| XM_355205 // | 840    | P        | 2209   | P        | 2.64         | I    | Raph1          | Ras association (RalGDS/AF-6) and pleckstrin homology domains 1               |      |
| XM_355205 // | 666    | P        | 2039   | P        | 2.64         | I    | Raph1          | Ras association (RalGDS/AF-6) and pleckstrin homology domains 1               |      |
| NM_133358    | 112    | P        | 295    | P        | 2.64         | I    | Zfp617         | zinc finger protein 617                                                       |      |
| NM_026532    | 671    | P        | 1732   | P        | 2.64         | I    | Nut2           | nuclear transport factor 2                                                    |      |
| NM_198620    | 176    | P        | 442    | P        | 2.64         | I    | Gm440          | gene model 440, (NCBI)                                                        |      |
| NM_179936    | 91     | P        | 169    | P        | 2.64         | I    | Tmem56         | transmembrane protein 56                                                      |      |
| NM_134163    | 66     | P        | 189    | P        | 2.64         | I    | Mbn13          | muscleblind-like 3 (Drosophila)                                               |      |
| NM_009890 // | 151    | P        | 425    | P        | 2.64         | I    | Ctbp2 // Zran  | C-terminal binding protein 2 // zinc finger, RAN-binding domain contain       |      |
| NM_175092    | 333    | P        | 980    | P        | 2.64         | I    | Rnf4           | Ras homolog gene family, member 1                                             |      |
| XM_484192 // | 98     | P        | 289    | P        | 2.64         | I    | A430041B07     | RIKEN cDNA A430041B07 gene                                                    |      |
| NM_173371 // | 533    | P        | 1481   | P        | 2.64         | I    | Sfrs1          | splicing factor, arginine/serine-rich 1 (ASF/SF2)                             |      |
| NM_175389    | 19     | P        | 67     | P        | 2.64         | MI   | Rgsmid2        | RNA (guanine 8') methyltransferase domain containing 2                        |      |
| NM_008974    | 757    | P        | 1928   | P        | 2.64         | I    | Pis422         | Protein tyrosine phosphatase 422                                              |      |
| NM_008831    | 39     | P        | 107    | P        | 2.64         | I    | Phb            | Prohibitin                                                                    |      |
| NM_027421    | 29     | P        | 76     | P        | 2.64         | I    | Ints2          | integrator complex subunit 2                                                  |      |
| NM_146234    | 44     | P        | 110    | P        | 2.64         | MI   | Tmem32         | transmembrane protein 32                                                      |      |
| NM_024188    | 324    | P        | 887    | P        | 2.64         | I    | Oxct1          | 3-oxoacyl CoA transferase 1                                                   |      |
| XM_359326 // | 60     | P        | 171    | P        | 2.64         | I    | Jard1a         | jumonji, AT rich interactive domain 1A (Rbp2 like)                            |      |
| XM_899706 // | 104    | P        | 274    | P        | 2.64         | I    | Lsm6           | LSM6 homolog, U6 small nuclear RNA associated (S. cerevisiae)                 |      |
| NM_009373    | 404    | P        | 1034   | P        | 2.64         | I    | Tgm2           | transglutaminase 2, C polypeptide                                             |      |
| NM_197982    | 253    | P        | 731    | P        | 2.64         | I    | Ddx39          | DEAD (Asp-Glu-Ala-Asp) box polypeptide 39                                     |      |
| NM_009418    | 88     | P        | 222    | P        | 2.64         | I    | Tpp2           | tripeptidyl peptidase II                                                      |      |
| NM_008568    | 189    | P        | 493    | P        | 2.64         | I    | Mcm7           | minichromosome maintenance deficient 7 (S. cerevisiae)                        |      |
| NM_145569    | 148    | P        | 358    | P        | 2.64         | I    | Mat2a          | methionine adenosyltransferase II, alpha                                      |      |
| NM_009716    | 245    | P        | 618    | P        | 2.64         | I    | Atf4           | activating transcription factor 4                                             |      |
| NM_172381    | 71     | P        | 215    | P        | 2.64         | I    | A1314180       | expressed sequence A1314180                                                   |      |
| NM_025364 // | 164    | P        | 462    | P        | 2.64         | I    | 1110005A233    | RIKEN cDNA 1110005A233 gene // similar to cytokine induced protein 2          |      |
| NM_175294    | 61     | P        | 217    | P        | 2.64         | I    | Nucks1         | nuclear casein kinase and cyclin-dependent kinase substrate 1                 |      |
| ---          | 57     | M        | 139    | P        | 2.64         | I    | ---            | 1 transcribed locus                                                           |      |
| NM_026542    | 187    | P        | 567    | P        | 2.64         | I    | D11Erd333e     | DNA segment, Chr 11, ERATO Doi 333, expressed                                 |      |

| Transcript   | WT     |          | KO     |          | Change KO/WT |      | Symbol      | Title                                                                           | Gene |
|--------------|--------|----------|--------|----------|--------------|------|-------------|---------------------------------------------------------------------------------|------|
|              | Signal | Detectio | Signal | Detectio | Fold         | Call |             |                                                                                 |      |
| NM_182994    | 104    | P        | 278    | P        | 2.64         | I    | Ar15a       | ADP-ribosylation factor-like 5A                                                 |      |
| NM_00103969  | 52     | P        | 176    | P        | 2.64         | I    | Mpa21 // LO | macrophage activation 2 like 1 // similar to macrophage activation 2 like // si |      |
| NM_024177    | 107    | P        | 254    | P        | 2.64         | I    | Mrp138      | mitochondrial ribosomal protein L38                                             |      |
| NM_008894    | 48     | P        | 115    | P        | 2.64         | I    | Pold2       | polymerase (DNA directed), delta 2, regulatory subunit                          |      |
| NM_019537    | 88     | P        | 226    | P        | 2.64         | I    | Dscr2       | Down syndrome critical region homolog 2 (human)                                 |      |
| NM_018829    | 106    | P        | 349    | P        | 2.64         | I    | Ap3m1       | adaptor-related protein complex 3, mu 1 subunit                                 |      |
| NM_026526    | 79     | P        | 185    | P        | 2.64         | I    | 3110001A13  | RIKEN cDNA 3110001A13 gene                                                      |      |
| NM_016917    | 29     | P        | 94     | P        | 2.64         | I    | Slc40a1     | solute carrier family 40 (iron-regulated transporter), member 1                 |      |
| NM_007952    | 42     | P        | 147    | P        | 2.64         | I    | Bmi1        | B lymphoma Mo-MuL1 insertion region 1                                           |      |
| NM_011338    | 28     | A        | 54     | P        | 2.64         | MI   | Cc9         | chemokine (C-C motif) ligand 9                                                  |      |
| NM_024188    | 1099   | P        | 2766   | P        | 2.64         | I    | Oxct1       | 3-oxoacyl CoA transferase 1                                                     |      |
| NM_033563    | 41     | P        | 95     | P        | 2.64         | MI   | Klf7        | Kruppel-like factor 7 (ubiquitous)                                              |      |
| NM_133790    | 502    | P        | 1378   | P        | 2.64         | I    | Acot12      | acyl-CoA thioesterase 12                                                        |      |
| NM_133771 // | 131    | P        | 330    | P        | 2.64         | I    | 061001610   | RIKEN cDNA 061001610 gene // hypothetical LOC619602                             |      |
| NM_016723 // | 140    | P        | 332    | P        | 2.64         | I    | Uch3 // Uch | ubiquitin carboxyl-terminal esterase L3 (ubiquitin thioesterase) // ubiquitin   |      |
| NM_019978    | 32     | P        | 83     | P        | 2.64         | I    | Icamk1      | double cortin and calcium/calmodulin-dependent protein kinase-like 1            |      |
| NM_011723    | 1903   | P        | 5295   | P        | 2.64         | I    | Xdh         | xanthine dehydrogenase                                                          |      |
| NM_026744    | 336    | P        | 900    | P        | 2.64         | I    | Mrp53       | mitochondrial ribosomal protein L53                                             |      |
| ---          | 103    | P        | 233    | P        | 2.64         | I    | ---         | ---                                                                             |      |
| NM_146251    | 33     | P        | 94     | P        | 2.64         | I    | BC027342    | cDNA sequence BC027342                                                          |      |
| NM_0010380   | 70     | P        | 150    | P        | 2.64         | I    | Gprk6       | G protein-coupled receptor kinase 6                                             |      |
| NM_009663    | 54     | P        | 163    | P        | 2.64         | I    | Alox5ap     | arachidonate 5-lipoxygenase activating protein                                  |      |
| NM_009931    | 72     | P        | 233    | P        | 2.64         | I    | Cc3a1       | procollagen, type IV, alpha 1                                                   |      |
| NM_144545    | 295    | P        | 765    | P        | 2.64         | I    | Eif3s1      | eukaryotic translation initiation factor 3, subunit 1 alpha                     |      |
| XM_128374 // | 86     | P        | 256    | P        | 2.64         | I    | Zfp294      | zinc finger protein 294                                                         |      |
| NM_028358 // | 130    | P        | 372    | P        | 2.64         | I    | Ssbp1       | single-stranded DNA binding protein 1                                           |      |
| NM_023136    | 26     | M        | 83     | P        | 2.64         | I    | Dlymk       | deoxythymidylate kinase                                                         |      |
| NM_025969    | 76     | P        | 193    | P        | 2.64         | I    | 1700034H14  | RIKEN cDNA 1700034H14 gene                                                      |      |
| NM_028866    | 58     | P        | 146    | P        | 2.64         | I    | Wdr33       | WD repeat domain 33                                                             |      |
| NM_0010390   | 41     | A        | 111    | P        | 2.64         | I    | Sel1h       | Sel1 (suppressor of lin-12) 1 homolog (C. elegans)                              |      |
| NM_173363    | 1011   | P        | 2480   | P        | 2.64         | I    | Eif5        | eukaryotic translation initiation factor 5                                      |      |
| XM_133073 // | 118    | P        | 328    | P        | 2.64         | I    | Nup205      | nucleoporin 205                                                                 |      |
| NM_134086    | 94     | P        | 219    | P        | 2.64         | I    | Slc38a1     | solute carrier family 38, member 1                                              |      |
| NM_0010133   | 64     | P        | 138    | P        | 2.64         | MI   | Utp18       | UTP18, small subunit (SSU) processome component, homolog (yeast)                |      |
| NM_0010133   | 119    | P        | 257    | P        | 2.64         | I    | Pfdn4       |                                                                                 |      |

| Transcript  | WT     |          | KO     |          | Change KO/WT |      | Gene       |                                                                                                             |
|-------------|--------|----------|--------|----------|--------------|------|------------|-------------------------------------------------------------------------------------------------------------|
|             | Signal | Detectio | Signal | Detectio | Fold         | Call | Symbol     | Title                                                                                                       |
| NM_011958   | 32     | P        | 98     | P        | 2.83         | I    | Orc4l      | origin recognition complex, subunit 4-like (S. cerevisiae)                                                  |
| NM_013885   | 98     | P        | 210    | P        | 2.83         | I    | Clic4      | chloride intracellular channel 4 (mitochondrial)                                                            |
| NM_133702   | 45     | P        | 107    | P        | 2.83         | I    | Nol1f      | nucleolar protein 11                                                                                        |
| NM_025500   | 93     | P        | 204    | P        | 2.83         | I    | Mrlp37     | mitochondrial ribosomal protein L37                                                                         |
| NM_026472   | 61     | P        | 143    | P        | 2.83         | I    | Mki67p     | Mki67 (FHA domain) interacting nucleolar phosphoprotein                                                     |
| NM_144866   | 333    | P        | 980    | P        | 2.83         | I    | Etf1       | eukaryotic translation termination factor 1                                                                 |
| NM_144904   | 73     | P        | 176    | P        | 2.83         | I    | Rod1       | ROD1 regulator of differentiation 1 (S. pombe)                                                              |
| NM_013872   | 101    | P        | 278    | P        | 2.83         | I    | Pmm1       | phosphoinositide 3-kinase                                                                                   |
| NM_027532   | 74     | P        | 197    | P        | 2.83         | I    | 3200002M19 | RIKEN cDNA 3200002M19 gene                                                                                  |
| NM_198645   | 120    | P        | 303    | P        | 2.83         | I    | Cocd58     | coiled-coil domain containing 58                                                                            |
| NM_015762   | 169    | A        | 531    | P        | 2.83         | I    | Txnd1f     | thioredoxin reductase 1                                                                                     |
| NM_027250   | 102    | P        | 241    | P        | 2.83         | MI   | 2070305A19 | RIKEN cDNA 2070305A19 gene                                                                                  |
| NM_146083   | 238    | P        | 685    | P        | 2.83         | I    | Hnrp2      | heterogeneous nuclear ribonucleoprotein D                                                                   |
| NM_007516   | 247    | P        | 782    | P        | 2.83         | I    | Sfrs7      | splicing factor, arginine/serine-rich 7                                                                     |
| NM_0103908  | 310    | P        | 924    | P        | 2.83         | I    | Serf1h     | Serf1 (suppressor of lin-12) 1 homolog (C. elegans)                                                         |
| NM_029735   | 110    | P        | 280    | P        | 2.83         | I    | Epr3       | glutamyl-prolyl-tRNA synthetase // similar to Bifunctional aminoacyl-tRNA synthetase                        |
| NM_028044   | 73     | P        | 164    | P        | 2.83         | I    | Cnr3       | calciponin 3, acidic                                                                                        |
| NM_0100334  | 100    | P        | 286    | P        | 2.83         | MI   | A630082K20 | RIKEN cDNA A630082K20 gene                                                                                  |
| NM_917085   | 130    | P        | 374    | P        | 2.83         | I    | A1848100   | expressed sequence A1848100                                                                                 |
| NM_029344   | 39     | P        | 109    | P        | 2.83         | I    | Acyp2      | acylphosphatase 2, muscle type                                                                              |
| NM_026742   | 96     | P        | 309    | P        | 2.83         | I    | 1110007M04 | RIKEN cDNA 1110007M04 gene                                                                                  |
| NM_173374   | 621    | P        | 1625   | P        | 2.83         | I    | Sfrs1      | splicing factor, arginine/serine-rich 1 (ASF/SF2)                                                           |
| NM_146130   | 611    | P        | 1904   | P        | 2.83         | I    | Hnrp3      | heterogeneous nuclear ribonucleoprotein A3 // similar to heterogeneous nuclear ribonucleoprotein A3         |
| NM_028108   | 94     | P        | 234    | P        | 2.83         | I    | Mak3       | Mak3 homolog (S. cerevisiae)                                                                                |
| NM_026580   | 24     | P        | 75     | P        | 2.83         | I    | Ccac8      | cell division cycle associated 8                                                                            |
| NM_026580   | 67     | P        | 207    | P        | 2.83         | I    | Ccac8      | cell division cycle associated 8                                                                            |
| NM_028604   | 34     | A        | 115    | P        | 2.83         | I    | 2410075D05 | RIKEN cDNA 2410075D05 gene                                                                                  |
| ---         | 1770   | P        | 4853   | P        | 2.83         | I    | 2810423A18 | RIKEN cDNA 2810423A18 gene                                                                                  |
| NM_128902   | 287    | P        | 712    | P        | 2.83         | I    | Xpot       | exportin, tRNA (nuclear export receptor for tRNAs)                                                          |
| NM_011605   | 63     | P        | 174    | P        | 2.83         | I    | Tmpo       | thymopietin                                                                                                 |
| NM_027421   | 45     | P        | 118    | P        | 2.83         | I    | Ints2      | integrator complex subunit 2                                                                                |
| NM_172895   | 159    | P        | 382    | P        | 2.83         | I    | Plaa       | phospholipase A2, activating protein                                                                        |
| NM_026250   | 44     | P        | 149    | P        | 2.83         | I    | 4930429M06 | RIKEN cDNA 4930429M06 gene                                                                                  |
| NM_00102438 | 167    | P        | 423    | P        | 2.83         | I    | Cris1      | cardiolipin synthase 1                                                                                      |
| NM_027861   | 40     | P        | 163    | P        | 2.83         | MI   | 0610010K06 | RIKEN cDNA 0610010K06 gene                                                                                  |
| NM_178112   | 17     | A        | 54     | P        | 2.83         | I    | Ints8      | integrator complex subunit 8                                                                                |
| NM_024437   | 201    | P        | 525    | P        | 2.83         | I    | Nudt7      | nudix (nucleoside diphosphate linked moiety X)-type motif 7                                                 |
| NM_175294   | 159    | P        | 532    | P        | 2.83         | I    | Nucks1     | nuclear casein kinase and cyclin-dependent kinase substrate 1                                               |
| NM_173363   | 473    | P        | 1315   | P        | 2.83         | I    | Eif5       | eukaryotic translation initiation factor 5                                                                  |
| NR_002896   | 99     | P        | 263    | P        | 2.83         | I    | Snord22    | small nuclear RNA, C/D box 22                                                                               |
| NM_175552   | 52     | P        | 151    | P        | 2.83         | I    | Wdr3       | WD repeat domain 3                                                                                          |
| NM_172722   | 84     | P        | 194    | P        | 2.83         | I    | C330023M02 | RIKEN cDNA C330023M02 gene                                                                                  |
| NM_016805   | 26     | A        | 83     | P        | 2.83         | I    | Hnrpu      | Heterogeneous nuclear ribonucleoprotein U                                                                   |
| NM_0010394  | 92     | P        | 264    | P        | 2.83         | I    | Tcerg1     | transcription elongation regulator 1 (CA150)                                                                |
| NM_011864   | 1649   | P        | 5059   | P        | 2.83         | I    | Paps52     | 3'-phosphoadenosine 5'-phosphosulfate synthase 2                                                            |
| NM_172594   | 20     | P        | 57     | P        | 2.83         | I    | Dhx29      | DEAH (Asp-Glu-Ala-His) box polypeptide 29                                                                   |
| NM_011811   | 204    | P        | 504    | P        | 2.83         | I    | Farsib     | phenylalanine-tRNA synthetase-like, beta subunit                                                            |
| NM_010260   | 37     | P        | 95     | P        | 2.83         | I    | Gbp2       | guanylate nucleotide binding protein 2                                                                      |
| NM_030556   | 47     | P        | 110    | P        | 2.83         | I    | Sic19a3    | solute carrier family 19 (sodium/hydrogen exchanger), member 3                                              |
| NM_00100133 | 51     | P        | 171    | P        | 2.83         | I    | Centd1     | centaurin, delta 1                                                                                          |
| NM_140740   | 82     | P        | 235    | P        | 2.83         | I    | Dusp5      | dual specificity phosphatase 5                                                                              |
| NM_016682   | 215    | P        | 582    | P        | 2.83         | I    | Uble1b     | ubiquitin-like 1 (sentrin) activating enzyme E1B                                                            |
| NM_010480   | 499    | P        | 1463   | P        | 2.83         | I    | Hsp90aa1   | heat shock protein 90Da alpha (cytosolic), class A member 1                                                 |
| NM_00101588 | 103    | P        | 316    | P        | 2.83         | I    | Taf9       | TAF9 RNA polymerase II, TATA box binding protein (TBP)-associated factor 9                                  |
| NM_053217   | 123    | P        | 359    | P        | 2.83         | I    | 2010002M12 | RIKEN cDNA 2010002M12 gene                                                                                  |
| NM_173866   | 31     | P        | 88     | P        | 2.83         | I    | Gpt2       | glutamic pyruvate transaminase (alanine aminotransferase) 2                                                 |
| NM_181416   | 57     | P        | 228    | P        | 2.83         | I    | Arhgap11a  | Rho GTPase activating protein 11A                                                                           |
| NM_013761   | 40     | P        | 92     | P        | 2.83         | MI   | Srr        | serine racemase                                                                                             |
| NM_199146   | 60     | P        | 180    | P        | 2.83         | I    | AH451617   | expressed sequence AH451617                                                                                 |
| NM_008567   | 25     | P        | 90     | P        | 2.83         | I    | Mcm6       | minichromosome maintenance deficient 6 (MIS5 homolog, S. pombe) (S. pombe)                                  |
| NM_008568   | 44     | P        | 104    | P        | 2.83         | I    | Mcm7       | minichromosome maintenance deficient 7 (S. cerevisiae) // similar to minichromosome maintenance deficient 6 |
| NM_148041   | 116    | P        | 437    | P        | 2.83         | I    | Gmd5       | GDP-mannose 4, 6-dehydratase                                                                                |
| NM_897902   | 41     | P        | 137    | P        | 2.83         | MI   | Brdw3      | bromodomain and WD repeat domain containing 3                                                               |
| NM_009048   | 33     | P        | 87     | P        | 2.83         | I    | Reps1      | RABP1 associated Eps domain containing protein                                                              |
| NM_125910   | 188    | P        | 524    | P        | 2.83         | I    | Xpot       | exportin, tRNA (nuclear export receptor for tRNAs)                                                          |
| NM_028824   | 81     | P        | 185    | P        | 2.83         | I    | Mtac2d1    | membrane targeting (tandem) C2 domain containing 1                                                          |
| NM_053074   | 274    | P        | 683    | P        | 2.83         | I    | Nup62      | nucleoporin 62                                                                                              |
| NM_009848   | 1073   | P        | 2825   | P        | 2.83         | I    | Cd243a     | CD243a antigen                                                                                              |
| NM_019553   | 47     | P        | 111    | P        | 2.83         | I    | Daz21      | DEAD (Asp-Glu-Ala-Asp) box polypeptide 21                                                                   |
| NM_016739   | 111    | P        | 307    | P        | 2.83         | I    | Gpiap1     | GPI-anchored membrane protein 1                                                                             |
| NM_018757   | 30     | A        | 86     | M        | 2.83         | I    | Nme6       | expressed in non-metastatic cells 6, protein                                                                |
| NM_019682   | 317    | P        | 830    | P        | 2.83         | I    | Dynl1      | dynein light chain LC8-type 1                                                                               |
| NM_026300   | 282    | P        | 1152   | P        | 2.83         | I    | Eif2s2     | eukaryotic translation initiation factor 2, subunit 2 (beta)                                                |
| NM_00103868 | 180    | P        | 534    | P        | 2.83         | I    | Sic16a3    | solute carrier family 16 (monocarboxylic acid transporters), member 3                                       |
| NM_026613   | 28     | P        | 98     | P        | 2.83         | I    | 281002O19  | RIKEN cDNA 281002O19 gene                                                                                   |
| NM_009836   | 145    | P        | 465    | P        | 2.83         | I    | Cct3       | chaperonin subunit 3 (gamma)                                                                                |
| NM_133249   | 200    | P        | 556    | P        | 2.83         | I    | Ppargc1b   | peroxisome proliferator activated receptor, gamma, coactivator 1, beta                                      |
| NM_018871   | 194    | P        | 578    | P        | 2.83         | I    | Ywhag      | 3-monooxygenase/tryptophan 5-monooxygenase activation protein, gamma                                        |
| ---         | 259    | P        | 616    | P        | 2.83         | I    | ---        | ---                                                                                                         |
| NM_008303   | 434    | P        | 1360   | P        | 2.83         | I    | Hsp61      | heat shock protein 1 (chaperonin 10)                                                                        |
| NM_025443   | 129    | P        | 333    | P        | 2.83         | I    | 1810003N24 | RIKEN cDNA 1810003N24 gene                                                                                  |
| NM_007681   | 38     | P        | 101    | P        | 2.83         | I    | Cenpa      | centromere auticentrogen A                                                                                  |
| NM_025824   | 342    | P        | 1043   | P        | 2.83         | I    | Bzw1       | basic leucine zipper and W2 domains 1                                                                       |
| NM_008889   | 230    | P        | 598    | P        | 2.83         | I    | Pp1r14b    | protein phosphatase 1, regulatory (inhibitor) subunit 14B                                                   |
| NM_010817   | 179    | P        | 471    | P        | 2.83         | I    | Psm7       | proteasome (prosome, macropain) 28S subunit, non-ATPase, 7                                                  |
| NM_197982   | 159    | P        | 562    | P        | 2.83         | I    | Dax39      | DEAD (Asp-Glu-Ala-Asp) box polypeptide 39                                                                   |

| Transcript  | WT     |          | KO     |          | Change KO/WT |      | Gene       |                                                                                                     |
|-------------|--------|----------|--------|----------|--------------|------|------------|-----------------------------------------------------------------------------------------------------|
|             | Signal | Detectio | Signal | Detectio | Fold         | Call | Symbol     | Title                                                                                               |
| NM_133975   | 41     | P        | 91     | P        | 2.83         | I    | Trip12     | thyroid hormone receptor interactor 12                                                              |
| NM_025878   | 87     | P        | 265    | P        | 2.83         | I    | Mrps18b    | mitochondrial ribosomal protein S18B                                                                |
| NM_146130   | 454    | P        | 1352   | P        | 2.83         | I    | Hnrp3      | heterogeneous nuclear ribonucleoprotein A3 // similar to heterogeneous nuclear ribonucleoprotein A3 |
| NM_144866   | 255    | P        | 769    | P        | 2.83         | I    | Etf1       | eukaryotic translation termination factor 1                                                         |
| NM_358313   | 23     | P        | 73     | P        | 2.83         | I    | BCU18507   | cDNA sequence BCU18507                                                                              |
| NM_009984   | 343    | P        | 1039   | P        | 2.83         | I    | Ctsi       | cathepsin L                                                                                         |
| NM_145612   | 22     | P        | 67     | P        | 2.83         | I    | BC005471   | cDNA sequence BC005471                                                                              |
| NM_025782   | 45     | P        | 133    | P        | 2.83         | I    | 9130422G05 | RIKEN cDNA 9130422G05 gene                                                                          |
| NM_029735   | 146    | P        | 433    | P        | 2.83         | I    | Epr3       | glutamyl-prolyl-tRNA synthetase // similar to Bifunctional aminoacyl-tRNA synthetase                |
| NM_176979   | 71     | P        | 196    | P        | 2.83         | I    | Toppb1     | topoisomerase (DNA) II beta binding protein                                                         |
| NM_0010259  | 29     | A        | 86     | P        | 2.83         | I    | Dnm11      | dynamitin 1-like                                                                                    |
| NM_026114   | 293    | P        | 848    | P        | 2.83         | I    | Eif2s1     | eukaryotic translation initiation factor 2, subunit 1 alpha                                         |
| NM_027350   | 1583   | P        | 4644   | P        | 2.83         | I    | Nars       | asparaginyl-tRNA synthetase                                                                         |
| NM_0010403  | 42     | P        | 108    | P        | 2.83         | I    | 1110020G09 | RIKEN cDNA 1110020G09 gene                                                                          |
| NM_019755   | 216    | P        | 529    | P        | 2.83         | I    | Hlp2       | proteasid protein 2                                                                                 |
| NM_173374   | 504    | P        | 1405   | P        | 2.83         | I    | Sfrs1      | splicing factor, arginine/serine-rich 1 (ASF/SF2)                                                   |
| NM_025305   | 168    | P        | 391    | P        | 2.83         | I    | Mrps7      | mitochondrial ribosomal protein S7                                                                  |
| NM_023731   | 63     | A        | 64     | P        | 2.83         | I    | Ccdc86     | coiled-coil domain containing 86                                                                    |
| NM_0010046  | 16     | P        | 176    | P        | 2.83         | I    | Ibk        | inhibitor of Bruton agammaglobulinemia tyrosine kinase                                              |
| NM_020279   | 92     | P        | 265    | P        | 2.83         | I    | Ccl28      | Chemokine (C-C motif) ligand 28                                                                     |
| NM_197982   | 265    | P        | 783    | P        | 2.83         | I    | Ddx39      | DEAD (Asp-Glu-Ala-Asp) box polypeptide 39                                                           |
| NM_0010057  | 199    | P        | 575    | P        | 2.83         | I    | LOC673503  | hypothetical protein LOC673503                                                                      |
| NM_146200   | 783    | P        | 2243   | P        | 2.83         | I    | Eif3s8     | eukaryotic translation initiation factor 3, subunit 8                                               |
| NM_146200   | 1177   | P        | 3140   | P        | 2.83         | I    | Eif3s8     | eukaryotic translation initiation factor 3, subunit 8                                               |
| NM_019673   | 124    | P        | 255    | P        | 2.83         | I    | Actl6a     | actin-like 6A                                                                                       |
| NM_011830   | 109    | P        | 346    | P        | 3.03         | I    | Impdh2     | inosine 5'-phosphate dehydrogenase 2                                                                |
| NM_146200   | 444    | P        | 1345   | P        | 3.03         | I    | Eif3s8     | eukaryotic translation initiation factor 3, subunit 8                                               |
| NM_011631   | 1488   | P        | 4738   | P        | 3.03         | I    | Hsp90b1    | heat shock protein 90Da beta (grp94), member 1                                                      |
| NM_015751   | 71     | P        | 149    | P        | 3.03         | I    | Abce1      | ATP-binding cassette, sub-family E (OABP), member 1                                                 |
| NM_009551   | 189    | P        | 394    | P        | 3.03         | I    | Za20d2     | zinc finger, A20 domain containing 2                                                                |
| NM_029571   | 31     | P        | 121    | P        | 3.03         | I    | Kti12      | KTI12 homolog, chromatin associated (S. cerevisiae)                                                 |
| NM_013898   | 152    | P        | 558    | P        | 3.03         | I    | Timm8a1    | translocase of inner mitochondrial membrane 8 homolog a1 (yeast)                                    |
| NM_013898   | 51     | P        | 148    | P        | 3.03         | I    | Timm8a1    | translocase of inner mitochondrial membrane 8 homolog a1 (yeast)                                    |
| NM_130796   | 54     | A        | 140    | P        | 3.03         | I    | Snag1      | sorting nexin associated golgi protein 1                                                            |
| NM_010790   | 27     | P        | 87     | P        | 3.03         | I    | Melk       | maternal embryonic leucine zipper kinase                                                            |
| NM_025897   | 21     | A        | 60     | P        | 3.03         | I    | 1500003O22 | RIKEN cDNA 1500003O22 gene                                                                          |
| NM_018738   | 545    | P        | 1820   | P        | 3.03         | I    | Igtp       | interferon gamma induced GTPase                                                                     |
| NM_019682   | 619    | P        | 1781   | P        | 3.03         | I    | Dynl1      | dynein light chain LC8-type 1 // similar to dynein, cytoplasmic, light peptid                       |
| NM_007552   | 89     | P        | 365    | P        | 3.03         | I    | Bmi1       | B lymphoma Mo-MuLV insertion region 1                                                               |
| NM_026030   | 1456   | P        | 4413   | P        | 3.03         | I    | Eif2s2     | eukaryotic translation initiation factor 2, subunit 2 (beta)                                        |
| NM_133681   | 145    | P        | 421    | P        | 3.03         | I    | Tspan1     | tetraspanin 1                                                                                       |
| NM_025829   | 92     | P        | 265    | P        | 3.03         | I    | Eif4e3     | eukaryotic translation initiation factor 4E, member 3                                               |
| NM_010193   | 22     | A        | 65     | P        | 3.03         | I    | Fem1b      | feminization 1 homolog b (C. elegans)                                                               |
| NM_007481   | 102    | P        | 319    | P        | 3.03         | I    | Arf6       | ADP-ribosylation factor 6                                                                           |
| NM_008092   | 72     | P        | 178    | P        | 3.03         | I    | Gata4      | GATA binding protein 4                                                                              |
| NM_025505   | 75     | P        | 171    | P        | 3.03         | I    | Bizf1      | basic leucine zipper nuclear factor 1                                                               |
| NM_025505   | 54     | P        | 164    | P        | 3.03         | I    | Bizf1      | basic leucine zipper nuclear factor 1                                                               |
| NM_021792   | 24     | P        | 76     | P        | 3.03         | I    | Ilgp1      | interferon inducible GTPase 1                                                                       |
| NM_008935   | 204    | P        | 674    | P        | 3.03         | I    | Prom1      | prominin 1                                                                                          |
| NM_007792   | 161    | P        | 547    | P        | 3.03         | I    | Csrp2      | cysteine and glycine-rich protein 2                                                                 |
| NM_080452   | 97     | P        | 295    | P        | 3.03         | I    | Mrps2      | mitochondrial ribosomal protein S2                                                                  |
| NM_0010394  | 51     | P        | 136    | P        | 3.03         | I    | Tcerg1     | transcription elongation regulator 1 (CA150)                                                        |
| NM_0081817  | 600    | P        | 1997   | P        | 3.03         | I    | Gsta1      | glutathione S-transferase, alpha 1 (Ya) // glutathione S-transferase, alpha                         |
| NM_026490   | 82     | P        | 210    | P        | 3.03         | I    | Mrlp19     | mitochondrial ribosomal protein L19                                                                 |
| NM_025777   | 94     | P        | 192    | P        | 3.03         | I    | 9030623N16 | RIKEN cDNA 9030623N16 gene                                                                          |
| NM_0080627  | 119    | P        | 401    | P        | 3.03         | I    | G6pd2      | glucose-6-phosphate dehydrogenase 2 // glucose-6-phosphate dehydrogenase 2                          |
| NM_013820   | 209    | P        | 602    | P        | 3.03         | I    | Hk2        | hexokinase 2                                                                                        |
| NM_008775</ |        |          |        |          |              |      |            |                                                                                                     |

| Transcript | WT     |          | KO     |          | Change KO/WT |      | Gene         |                                                                                |
|------------|--------|----------|--------|----------|--------------|------|--------------|--------------------------------------------------------------------------------|
|            | Signal | Detectio | Signal | Detectio | Fold         | Call | Symbol       | Title                                                                          |
| NM_015781  | 33     | P        | 89     | P        | 3.03         | I    | Nap11        | nucleosome assembly protein 1-like 1                                           |
| XM_127444  | 22     | P        | 93     | P        | 3.03         | MI   | Trp13        | thyroid hormone receptor interactor 13                                         |
| NM_029673  | 181    | P        | 546    | P        | 3.03         | I    | Immt         | inner membrane protein, mitochondrial                                          |
| NM_008615  | 32     | P        | 1153   | P        | 3.03         | I    | Mod1 // LOC  | malic enzyme, supernatant // similar to NADP-dependent malic enzyme            |
| NM_028696  | 53     | P        | 174    | P        | 3.03         | I    | 583041TE10   | RIKEN cDNA 583041TE10 gene                                                     |
| NM_173374  | 144    | P        | 509    | P        | 3.03         | I    | Sfrs1        | splicing factor, arginine/serine-rich 1 (ASF/SF2)                              |
| NM_018745  | 48     | P        | 182    | P        | 3.03         | I    | Azin1        | antizyme inhibitor 1                                                           |
| NM_025881  | 18     | A        | 65     | P        | 3.03         | MI   | Luc7         | Luc7/homolog (S. cerevisiae)-like                                              |
| NM_179450  | 45     | P        | 130    | M        | 3.03         | I    | Wdr18        | WD repeat domain 18                                                            |
| NR_002896  | 77     | P        | 215    | P        | 3.03         | I    | Snord22      | small nuclear RNA, C/D box 22                                                  |
| NM_0010374 | 32     | P        | 102    | P        | 3.03         | I    | AU021838     | expressed sequence AU021838                                                    |
| NM_178907  | 58     | P        | 305    | P        | 3.03         | I    | Mapkap3      | mitogen-activated protein kinase-activated protein kinase 3                    |
| NM_172746  | 30     | P        | 105    | P        | 3.03         | I    | Himp3        | HIRA interacting protein 3                                                     |
| XM_618789  | 21     | A        | 69     | P        | 3.03         | I    | Himp3        | HIRA interacting protein 3                                                     |
| NM_021384  | 255    | P        | 82     | P        | 3.03         | I    | Rsad2        | radical S-adenosyl methionine domain containing 2                              |
| NM_922730  | 64     | P        | 162    | P        | 3.03         | I    | C330009K14   | RIKEN cDNA C330009K14 gene                                                     |
| NM_0010395 | 129    | P        | 406    | P        | 3.03         | I    | 2210010A19   | RIKEN cDNA 2210010A19 gene                                                     |
| NM_0010017 | 20     | A        | 58     | P        | 3.03         | I    | 5830428H23   | RIKEN cDNA 5830428H23 gene                                                     |
| NM_008568  | 53     | P        | 155    | P        | 3.03         | I    | Mcm5         | minichromosome maintenance deficient 5, cell division cycle 46 (S. cerevisiae) |
| NM_028044  | 115    | P        | 336    | P        | 3.03         | I    | Cnn3         | calponin 3, acidic                                                             |
| NM_026560  | 54     | P        | 176    | P        | 3.03         | I    | Caca8        | cell division cycle associated 8                                               |
| NM_0010245 | 32     | A        | 89     | P        | 3.03         | I    | AW495713     | expressed sequence AW495713                                                    |
| NM_011468  | 837    | P        | 2578   | P        | 3.03         | I    | Spr2a        | small proline-rich protein 2A                                                  |
| NM_0010380 | 118    | P        | 345    | P        | 3.03         | I    | Gprk6        | G protein-coupled receptor kinase 6                                            |
| NM_0010303 | 53     | P        | 169    | P        | 3.03         | I    | BC088171     | cDNA sequence BC088171                                                         |
| XM_907983  | 281    | P        | 816    | P        | 3.03         | I    | Herc5        | hect domain and RLD 5                                                          |
| NM_197982  | 39     | P        | 75     | P        | 3.03         | I    | Dax39        | DEAD (Asp-Glu-Ala-Asp) box polypeptide 39                                      |
| NM_013885  | 144    | P        | 378    | P        | 3.03         | I    | Clic4        | chloride intracellular channel 4 (mitochondrial)                               |
| ---        | 356    | P        | 1128   | P        | ---          | ---  | ---          | Transcribed locus                                                              |
| NM_010480  | 647    | P        | 2037   | P        | 3.03         | I    | Hsp90aa1     | heat shock protein 90kDa alpha (cytosolic), class A member 1                   |
| NM_053074  | 59     | P        | 224    | P        | 3.03         | I    | Nup62        | nucleoporin 62                                                                 |
| XM_980284  | 68     | A        | 147    | P        | 3.03         | I    | BC010304     | cDNA sequence BC010304                                                         |
| XM_980284  | 37     | P        | 91     | P        | 3.03         | I    | BC010304     | cDNA sequence BC010304                                                         |
| NM_175440  | 40     | P        | 114    | P        | 3.03         | I    | Prss27       | protease, serine 27                                                            |
| NM_131566  | 44     | A        | 99     | P        | 3.03         | I    | Usp24        | ubiquitin specific peptidase 24                                                |
| NM_010368  | 123    | P        | 349    | P        | 3.03         | I    | Gusb         | glucuronidase, beta                                                            |
| NM_010431  | 49     | P        | 185    | P        | 3.03         | I    | Hif1a        | hypoxia inducible factor 1, alpha subunit                                      |
| NM_016810  | 60     | P        | 187    | P        | 3.03         | I    | Gosr1        | golgi SNAP receptor complex member 1                                           |
| NM_023209  | 53     | P        | 184    | P        | 3.03         | I    | Pbk          | PDZ binding kinase                                                             |
| NM_008012  | 59     | P        | 186    | P        | 3.03         | I    | Akr1b8       | aldo-keto reductase family 1, member B8                                        |
| NM_024250  | 256    | P        | 788    | P        | 3.03         | I    | PHF10        | PHD finger protein 10                                                          |
| NM_023323  | 39     | P        | 83     | P        | 3.03         | I    | Bxdc1        | brix domain containing 1                                                       |
| NM_008199  | 184    | P        | 781    | P        | 3.03         | I    | H2-B1        | histocompatibility 2, blastocyst                                               |
| NM_016805  | 157    | P        | 492    | P        | 3.03         | I    | Hnrp         | heterogeneous nuclear ribonucleoprotein U                                      |
| NM_024433  | 21     | M        | 64     | P        | 3.03         | I    | Mtap         | methylthioadenosine phosphorylase                                              |
| NM_007914  | 70     | P        | 214    | P        | 3.03         | I    | Ehf          | ets homologous factor                                                          |
| NM_020331  | 212    | P        | 778    | P        | 3.03         | I    | Gtf2ird1     | general transcription factor II I repeat domain-containing 1                   |
| NM_028871  | 21     | P        | 77     | P        | 3.03         | I    | Hnrp         | heterogeneous nuclear ribonucleoprotein R                                      |
| NM_029735  | 68     | P        | 228    | P        | 3.03         | I    | Eprs // LOC  | glutamyl-prolyl-IRNA synthetase // similar to Bifunctional aminocyl-IRNA       |
| XM_907983  | 96     | P        | 275    | P        | 3.03         | I    | Herc5        | hect domain and RLD 5                                                          |
| NM_173363  | 455    | P        | 1242   | P        | 3.03         | I    | Erf5         | eukaryotic translation initiation factor 5                                     |
| NM_153089  | 59     | A        | 104    | P        | 3.03         | MI   | Ppp1f16b     | protein phosphatase 1, regulatory (inhibitor) subunit 16B                      |
| NM_0010038 | 161    | P        | 400    | P        | 3.03         | I    | Tardp        | TAR DNA binding protein                                                        |
| NM_0010393 | 25     | P        | 102    | P        | 3.03         | MI   | Pde4dip      | phosphodiesterase 4D interacting protein (myomegalin)                          |
| NM_008702  | 16     | P        | 58     | P        | 3.03         | I    | Nik          | nemo like kinase                                                               |
| NM_009099  | 35     | P        | 122    | P        | 3.03         | I    | Trn30 // A14 | trp-trp motif protein 30 // expressed sequence A1451617                        |
| NM_011394  | 22     | P        | 114    | P        | 3.03         | I    | Sic20a2      | Solute carrier family 20, member 2                                             |
| ---        | 60     | P        | 143    | P        | 3.03         | MI   | ---          | Transcribed locus                                                              |
| NM_007749  | 31     | P        | 84     | P        | 3.03         | MI   | Cox7c        | cytochrome c oxidase, subunit VIIc                                             |
| NM_012000  | 120    | P        | 431    | P        | 3.03         | I    | Cln8         | ceroid-lipofuscinosis, neuronal 8                                              |
| NM_019766  | 562    | P        | 1648   | P        | 3.03         | I    | Ptges3       | prostaglandin E synthase 3 (cytosolic)                                         |
| NM_013470  | 52     | P        | 154    | P        | 3.03         | I    | Arixa3       | annexin A3                                                                     |
| NM_009103  | 54     | P        | 144    | P        | 3.25         | I    | Rrm1         | ribonucleotide reductase M1                                                    |
| NM_015751  | 114    | P        | 332    | P        | 3.25         | I    | Abce1        | ATP-binding cassette, sub-family E (OABP), member 1                            |
| NM_007871  | 182    | P        | 463    | P        | 3.25         | I    | Cd9          | CD9 antigen                                                                    |
| NM_009887  | 59     | P        | 177    | P        | 3.25         | I    | Apx1         | apurinic/apyrimidinic endonuclease 1                                           |
| NM_0010365 | 70     | P        | 331    | P        | 3.25         | I    | Usp14        | ubiquitin specific peptidase 14                                                |
| NM_025936  | 638    | P        | 2110   | P        | 3.25         | I    | Rars         | arginyl-tRNA synthetase                                                        |
| NM_028631  | 148    | P        | 458    | P        | 3.25         | I    | Nma2         | nucleolar protein family A, member 2                                           |
| NM_019926  | 297    | P        | 1052   | P        | 3.25         | I    | Mtm1         | X-linked muscular myopathy gene 1                                              |
| NM_026504  | 54     | P        | 146    | P        | 3.25         | I    | Cox5         | coenzyme Q5 homolog, methyltransferase (yeast)                                 |
| NM_010325  | 85     | P        | 271    | P        | 3.25         | I    | Goz2         | glutamate oxaloacetate transaminase 2, mitochondrial                           |
| NM_025695  | 28     | P        | 91     | P        | 3.25         | I    | Smc61        | SMC6 structural maintenance of chromosomes 6-like 1 (yeast)                    |
| NM_011909  | 449    | P        | 1331   | P        | 3.25         | I    | Usp18        | ubiquitin specific peptidase 18                                                |
| NM_134090  | 340    | P        | 1148   | P        | 3.25         | I    | Kdrlr3       | KDEL (Lys-Asp-Glu-Leu) endoplasmic reticulum protein retention receptor        |
| NM_011819  | 57     | M        | 228    | P        | 3.25         | I    | Gdf15        | growth differentiation factor 15                                               |
| NM_009635  | 63     | P        | 90     | P        | 3.25         | I    | Avil         | advillin                                                                       |
| NM_011495  | 25     | P        | 25     | P        | 3.25         | I    | Plk4         | polo-like kinase 4 (Drosophila)                                                |
| NM_023210  | 77     | P        | 203    | P        | 3.25         | I    | Anp32e       | acidic (leucine-rich) nuclear phosphoprotein 32 family, member E               |
| NM_021384  | 77     | P        | 210    | P        | 3.25         | I    | Rsad2        | radical S-adenosyl methionine domain containing 2                              |
| NM_023871  | 167    | P        | 540    | P        | 3.25         | I    | Sat // LOC   | SE1 translocator // similar to SE1 protein (Phosphatase 2A inhibitor 2)        |
| NM_011239  | 271    | P        | 934    | P        | 3.25         | I    | Ranp21       | RAN binding protein 1                                                          |
| NM_013602  | 3821   | P        | 14483  | P        | 3.25         | I    | Rd1          | metallothionein 1                                                              |
| NM_144904  | 72     | P        | 269    | P        | 3.25         | I    | Mod1         | ROD1 regulator of differentiation 1 (S. pombe)                                 |
| NM_148050  | 799    | P        | 3913   | P        | 3.25         | I    | Oit1         | oncogene induced transcript 1                                                  |
| NM_029810  | 53     | P        | 143    | P        | 3.25         | I    | Nt5c2        | 5'-nucleotidase, cytosolic II                                                  |

| Transcript | WT     |          | KO     |          | Change KO/WT |      | Gene         |                                                                              |
|------------|--------|----------|--------|----------|--------------|------|--------------|------------------------------------------------------------------------------|
|            | Signal | Detectio | Signal | Detectio | Fold         | Call | Symbol       | Title                                                                        |
| NM_010480  | 405    | P        | 1507   | P        | 3.25         | I    | Hsp90aa1     | heat shock protein 90kDa alpha (cytosolic), class A member 1                 |
| NM_172015  | 110    | P        | 397    | P        | 3.25         | I    | Iars         | isoleucine-tRNA synthetase                                                   |
| NM_0010006 | 107    | P        | 361    | P        | 3.25         | I    | Mki67 // LOC | antigen identified by monoclonal antibody Ki 67 // similar to Antigen Ki-67  |
| NM_0010406 | 115    | P        | 401    | P        | 3.25         | I    | Mtm7         | myotubularin related protein 7                                               |
| NM_199195  | 23     | P        | 56     | P        | 3.25         | I    | Bckknb       | branched chain ketoacid dehydrogenase E1, beta polypeptide                   |
| NM_0010247 | 55     | P        | 104    | P        | 3.25         | I    | LOC5449887   | hypothetical protein LOC5449887 // RIKEN cDNA B930046C15 gene // hi          |
| NM_153783  | 85     | P        | 266    | P        | 3.25         | I    | Paox         | polyamine oxidase (exo-N4-amino)                                             |
| NM_0270967 | 39     | P        | 125    | P        | 3.25         | I    | Prei4        | preimplantation protein 4                                                    |
| NM_027297  | 28     | P        | 94     | P        | 3.25         | I    | Prp4         | PRP4 pre-mRNA processing factor 4 homolog (yeast)                            |
| NM_0259427 | 148    | P        | 403    | P        | 3.25         | I    | 2810409H07   | RIKEN cDNA 2810409H07 gene                                                   |
| NM_013872  | 54     | A        | 174    | P        | 3.25         | I    | Pnm1         | phosphomannomutase 1                                                         |
| NM_144983  | 890    | P        | 2756   | P        | 3.25         | I    | Erf4a1       | eukaryotic translation initiation factor 4A1                                 |
| XM_907983  | 73     | P        | 247    | P        | 3.25         | I    | Herc5        | hect domain and RLD 5                                                        |
| NM_010768  | 21     | A        | 52     | P        | 3.25         | I    | Mtak         | meioticaryocyte-associated tyrosine kinase                                   |
| NM_145545  | 58     | P        | 184    | P        | 3.25         | I    | 9830147J24   | RIKEN cDNA 9830147J24 gene                                                   |
| NM_011400  | 93     | P        | 281    | P        | 3.25         | I    | Sic2a1       | solute carrier family 2 (facilitated glucose transporter), member 1          |
| XM_135805  | 87     | P        | 196    | P        | 3.25         | I    | Wdr44        | WD repeat domain 44                                                          |
| NM_026742  | 74     | P        | 218    | P        | 3.25         | I    | 1110007M04   | RIKEN cDNA 1110007M04 gene                                                   |
| NM_030013  | 13     | A        | 63     | P        | 3.25         | I    | Cyp20a1      | cytochrome P450, family 20, subfamily A, polypeptide 1                       |
| NM_175294  | 34     | P        | 115    | P        | 3.25         | I    | Nucks1       | nuclear casein kinase and cyclin-dependent kinase substrate 1                |
| ---        | 40     | A        | 176    | P        | 3.25         | I    | 4933404O12   | RIKEN cDNA 4933404O12 gene                                                   |
| NM_153402  | 13     | A        | 53     | P        | 3.25         | I    | Erf2c3       | eukaryotic translation initiation factor 2C, 3                               |
| ---        | 84     | P        | 272    | P        | 3.25         | I    | 9230110J10   | hypothetical protein 9230110J10                                              |
| NM_013761  | 125    | P        | 369    | P        | 3.25         | I    | Srr          | serine racemase                                                              |
| NM_007477  | 22     | P        | 60     | P        | 3.25         | I    | Ar2          | ADP-ribosylation factor 2                                                    |
| NM_008251  | 331    | P        | 791    | P        | 3.25         | I    | Hmg1         | high mobility group nucleosomal binding domain 1                             |
| NM_002896  | 137    | P        | 465    | P        | 3.25         | I    | Snord22      | small nuclear RNA, C/D box 22                                                |
| NM_0010303 | 20     | P        | 73     | P        | 3.25         | I    | BC088171     | cDNA sequence BC088171                                                       |
| NM_0010332 | 60     | P        | 178    | P        | 3.25         | I    | D130073L02   | RIKEN cDNA D130073L02 gene                                                   |
| ---        | 79     | P        | 232    | P        | 3.25         | I    | ---          | Transcribed locus                                                            |
| NM_010481  | 50     | P        | 156    | P        | 3.25         | I    | Hspa9a       | heat shock protein 9A                                                        |
| NM_0010406 | 101    | P        | 330    | P        | 3.25         | I    | Mtm7         | myotubularin related protein 7                                               |
| NM_026560  | 163    | P        | 521    | P        | 3.25         | I    | Snrg // LOC  | small nuclear ribonucleoprotein polypeptide G // similar to small nuclear ri |
| NM_011690  | 50     | A        | 199    | P        | 3.25         | I    | Vars2        | valyl-tRNA synthetase 2                                                      |
| NM_021329  | 34     | M        | 110    | P        | 3.25         | I    | 2400006H24   | RIKEN cDNA 2400006H24 gene                                                   |
| NM_009004  | 16     | A        | 59     | P        | 3.25         | MI   | Kif20a       | kinesin family member 20A                                                    |
| NM_0010248 | 50     | P        | 87     | P        | 3.25         | I    | Timm9        | translocase of inner mitochondrial membrane 9 homolog (yeast)                |
| NM_025835  | 288    | P        | 1260   | P        | 3.25         | I    | Pccb         | propionyl Coenzyme A carboxylase, beta polypeptide                           |
| NM_028762  | 17     | A        | 64     | P        | 3.25         | I    | Rbm19        | RNA binding motif protein 19                                                 |
| NM_011319  | 398    | P        | 1207   | P        | 3.25         | I    | Sars         | seryl-aminoacyl-tRNA synthetase                                              |
| NM_025782  | 63     | P        | 148    | P        | 3.25         | I    | 9130422G05   | RIKEN cDNA 9130422G05 gene                                                   |
| NM_0010052 | 27     | P        | 87     | P        | 3.25         | I    | Znht3        | zinc finger, HII type 3                                                      |
| NM_028230  | 80     | P        | 282    | P        | 3.25         | I    | Shmt2        | serine hydroxymethyl transferase 2 (mitochondrial)                           |
| NM_146066  | 48     | P        | 116    | P        | 3.25         | I    | Gsp1         | G1 to S phase transition 1                                                   |
| XM_1485957 | 102    | P        | 305    | P        | 3.25         | I    | 4921513D23   | RIKEN cDNA 4921513D23 gene                                                   |
| XM_1297697 | 643    | P        | 2920   | P        | 3.25         | I    | Cps1         | carbamoyl-phosphate synthetase 1                                             |
| NM_028044  | 42     | P        | 148    | P        | 3.25         | I    | Cnn3         | calponin 3, acidic                                                           |
| NM_007573  | 795    | P        | 2473   | P        | 3.25         | I    | C1qbp        | complement component 1, q subcomponent binding protein                       |
| NM_028044  | 13     | A        | 60     | P        | 3.25         | I    | Cnn3         | calponin 3, acidic                                                           |
| NM_026030  | 753    | P        | 2415   | P        | 3.25         | I    | Erf2s2       | eukaryotic translation initiation factor 2, subunit 2 (beta)                 |
| NM_0010393 | 29     | A        | 81     | M        | 3.25         | I    | Pde4dip      | phosphodiesterase 4D interacting protein (myomegalin)                        |
| NM_134151  | 101    | A        | 300    | P        | 3.25         | I    | Yars         | tyrosyl-tRNA synthetase                                                      |
| NM_053074  | 59     | A        | 252    | P        | 3.48         | I    | Nup62        | nucleoporin 62                                                               |
| NM_009846  | 359    | P        | 1196   | P        | 3.48         | I    | Cd24a        | CD24a antigen                                                                |
| NM_022310  | 2292   | P        | 8868   | P        | 3.48         | I    | Hspa5        | heat shock 70kD protein 5 (glucose-regulated protein)                        |
| NM_007991  | 135    | P        | 416    | P        | 3.48         | I    | Fbl          | fibinllan                                                                    |
| NM_016669  | 43     | P        | 165    | P        | 3.48         | I    | Crym         | crystallin, mu                                                               |
| NM_009230  | 63     | P        | 153    | P        | 3.48         | I    | Soat1        | sterol O-acetyltransferase 1                                                 |
| NM_007607  | 1146   | P        | 4056   | P        | 3.48         | I    | Car4         | carbonic anhydrase 4                                                         |
| NM_023595  | 31     | P        | 102    | P        | 3.48         | I    | Dut          | deoxyuridine triphosphatase                                                  |
| XM_904332  | 973    | P        | 3328   | P        | 3.48         | I    | LOC630729    | similar to Glutathione reductase, mitochondrial precursor (GR) (GRase)       |
| NM_010344  | 745    |          |        |          |              |      |              |                                                                              |



| Transcript  | WT     |          | KO     |          | Change KO/WT |      | Symbol                 | Title                                                                          | Gene |
|-------------|--------|----------|--------|----------|--------------|------|------------------------|--------------------------------------------------------------------------------|------|
|             | Signal | Detectio | Signal | Detectio | Fold         | Call |                        |                                                                                |      |
| NM_009846   | 188    | P        | 669    | P        | 3.48         | I    | Cd24a                  | CD24a antigen                                                                  |      |
| XM_978296   | 802    | P        | 2733   | P        | 3.48         | I    | MGC73635               | similar to histone 2a                                                          |      |
| NM_023136   | 47     | P        | 141    | P        | 3.48         | I    | Dtymk                  | deoxythymidylate kinase                                                        |      |
| NM_00103964 | 18     | M        | 88     | P        | 3.48         | I    | Mpa21 /// LOC          | macrophage activation 2 like /// similar to macrophage activation 2 like ///   |      |
| NM_173536   | 36     | P        | 117    | P        | 3.48         | I    | Pik4cb                 | phosphatidylinositol 4-kinase, catalytic, beta polypeptide                     |      |
| NM_027238   | 21     | P        | 87     | P        | 3.48         | I    | RIKEN cDNA 1810054D07  | RIKEN cDNA 1810054D07 gene                                                     |      |
| NM_010074   | 41     | P        | 125    | P        | 3.48         | I    | Dpp4                   | Dipeptidylpeptidase 4                                                          |      |
| XM_921367   | 42     | P        | 131    | P        | 3.48         | I    | Nbea1                  | neurobeachin like 1                                                            |      |
| NM_178688   | 19     | P        | 75     | P        | 3.48         | I    | E430028B21             | RIKEN cDNA E430028B21 gene                                                     |      |
| NM_009103   | 49     | P        | 130    | P        | 3.48         | I    | Rrm1                   | ribonucleotide reductase M1                                                    |      |
| NM_007573   | 231    | P        | 756    | P        | 3.48         | I    | C1tbp                  | complement component 1, q subcomponent binding protein                         |      |
| NM_029136   | 34     | P        | 83     | P        | 3.48         | I    | Dtymk                  | deoxythymidylate kinase                                                        |      |
| NM_027159   | 27     | A        | 96     | P        | 3.48         | I    | RIKEN cDNA 231006109R  | RIKEN cDNA 231006109R gene                                                     |      |
| NM_013742   | 119    | P        | 523    | P        | 3.48         | I    | Cars                   | cysteinyl-tRNA synthetase                                                      |      |
| NM_008252   | 119    | P        | 523    | P        | 3.48         | I    | Hmg62 /// LO           | high mobility group box 2 /// similar to High mobility group protein 2 (HMG)   |      |
| NM_028881   | 25     | M        | 72     | P        | 3.48         | I    | Luc7                   | Luc7 homolog (S. cerevisiae)-like                                              |      |
| NM_011623   | 112    | P        | 347    | P        | 3.48         | I    | Top2a                  | topoisomerase (DNA) II alpha                                                   |      |
| NM_021511   | 21     | P        | 63     | P        | 3.48         | I    | Rrs1                   | RRS1 ribosome biogenesis regulator homolog (S. cerevisiae)                     |      |
| NM_010931   | 22     | A        | 69     | P        | 3.73         | I    | Ubr1f                  | ubiquitin-like, containing PHD and RING finger domains, 1                      |      |
| NM_009128   | 36     | P        | 175    | P        | 3.73         | MI   | Scd2                   | stearoyl-Coenzyme A desaturase 2                                               |      |
| NM_008566   | 33     | P        | 125    | P        | 3.73         | I    | Mcm5                   | minichromosome maintenance deficient 5, cell division cycle 46 (S. cerevisiae) |      |
| NM_026831   | 82     | P        | 326    | P        | 3.73         | I    | Nol2a                  | nucleolar protein family A, member 2                                           |      |
| NM_019471   | 793    | P        | 2956   | P        | 3.73         | I    | Sc235                  | solute carrier family 2 (facilitated glucose transporter), member 5            |      |
| NM_007598   | 568    | P        | 2059   | P        | 3.73         | I    | Cap1                   | CAP, adenylate cyclase-associated protein 1 (yeast)                            |      |
| NM_009230   | 16     | M        | 74     | P        | 3.73         | I    | Scat1                  | sterol O-acetyltransferase 1                                                   |      |
| NM_010178   | 74     | P        | 287    | P        | 3.73         | I    | Fusp1                  | FUS interacting protein (serine-arginine rich) 1                               |      |
| NM_025520   | 67     | P        | 259    | P        | 3.73         | I    | Lsm5                   | LSM5 homolog, U6 small nuclear RNA associated (S. cerevisiae)                  |      |
| NM_130452   | 132    | P        | 496    | P        | 3.73         | I    | Bbox1                  | butyrolactin (gamma), 2-oxoglutarate dioxygenase 1 (gamma-butyrolactone)       |      |
| NM_013761   | 58     | P        | 236    | P        | 3.73         | I    | Srr                    | serine racemase                                                                |      |
| NM_021384   | 67     | P        | 257    | P        | 3.73         | I    | Rsad2                  | radical S-adenosyl methionine domain containing 2                              |      |
| NM_011864   | 98     | P        | 308    | P        | 3.73         | I    | Paps2                  | 3'-phosphoadenosine 5'-phosphosulfate synthase 2                               |      |
| NM_011864   | 325    | P        | 1292   | P        | 3.73         | I    | Paps2                  | 3'-phosphoadenosine 5'-phosphosulfate synthase 2                               |      |
| NM_009992   | 67     | P        | 267    | P        | 3.73         | I    | Cyp1a1                 | cytochrome P450, family 1, subfamily a, polypeptide 1                          |      |
| NM_008303   | 170    | P        | 495    | P        | 3.73         | I    | Hspe1 /// LOC          | heat shock protein 1 (chaperonin 10) /// similar to 10 kDa heat shock pro      |      |
| NM_008723   | 27     | P        | 113    | P        | 3.73         | I    | Npm3 /// Npm           | nucleoplasmin 3 /// nucleoplasmin 3, pseudogene 1 /// similar to Nucleo        |      |
| NM_030684   | 40     | P        | 130    | P        | 3.73         | I    | Trim34 /// LOC         | tripartite motif protein 34 /// similar to Tripartite motif protein 34         |      |
| NM_145953   | 318    | P        | 1309   | P        | 3.73         | I    | Cih                    | cystathionase (cystathionine gamma-lyase)                                      |      |
| XM_0010032  | 27     | A        | 102    | P        | 3.73         | I    | Pprc1                  | peroxisome proliferative activated receptor, gamma, coactivator-related        |      |
| NM_028230   | 34     | A        | 170    | P        | 3.73         | I    | Shm2                   | serine hydroxymethyl transferase 2 (mitochondrial)                             |      |
| NM_024193   | 36     | M        | 122    | P        | 3.73         | I    | Nol5a                  | nucleolar protein 5A                                                           |      |
| NM_016966   | 10     | A        | 76     | P        | 3.73         | I    | Phgdh /// LOC          | 3-phosphoglycerate dehydrogenase /// similar to 3-phosphoglycerate de          |      |
| NM_133692   | 22     | A        | 78     | P        | 3.73         | I    | Pold3                  | polymerase (DNA-directed), delta 3, accessory subunit                          |      |
| NM_028109   | 16     | A        | 64     | P        | 3.73         | MI   | Tpx2                   | TPX2, microtubule-associated protein homolog (Xenopus laevis)                  |      |
| NM_027350   | 968    | P        | 3435   | P        | 3.73         | I    | Nars                   | asparaginyl-tRNA synthetase                                                    |      |
| NM_008630   | 992    | P        | 3103   | P        | 3.73         | I    | Mt2                    | metallothionein 2                                                              |      |
| NM_029600   | 204    | P        | 780    | P        | 3.73         | I    | Abcc3                  | ATP-binding cassette, sub-family C (CFTR/MRP), member 3                        |      |
| NM_207212   | 56     | P        | 214    | P        | 3.73         | I    | Wtp                    | WT1-interacting protein                                                        |      |
| NM_026476   | 34     | P        | 125    | P        | 3.73         | I    | 2610T01N10             | RIKEN cDNA 2610T01N10 gene                                                     |      |
| NM_018876   | 214    | P        | 902    | P        | 3.73         | I    | Fut2                   | fucosyltransferase 2                                                           |      |
| NM_199146   | 206    | P        | 797    | P        | 3.73         | I    | AI451617               | expressed sequence AI451617                                                    |      |
| NM_011710   | 161    | P        | 689    | P        | 3.73         | I    | Wars                   | tryptophanyl-tRNA synthetase                                                   |      |
| NM_007963   | 81     | P        | 282    | P        | 3.73         | I    | Ewt1                   | ecotropic viral integration site 1                                             |      |
| XM_894696   | 95     | P        | 441    | P        | 3.73         | MI   | Dnahc2 /// Dr          | dynein, axonemal, heavy chain 2 /// dynein heavy chain domain 3                |      |
| NM_134188   | 32     | A        | 188    | P        | 3.73         | I    | Acot2                  | acyl-CoA thioesterase 2                                                        |      |
| NM_012000   | 67     | P        | 277    | P        | 3.73         | I    | Cln8                   | ceroid-lipofuscinosis, neuronal 8                                              |      |
| NM_019656   | 53     | P        | 127    | P        | 3.73         | I    | Ispan6                 | tetraspanin 6                                                                  |      |
| NM_013528   | 87     | P        | 284    | P        | 3.73         | I    | Gfpt1                  | glutamine fructose-6-phosphate transaminase 1                                  |      |
| NM_015774   | 314    | P        | 1193   | P        | 3.73         | I    | Ero1f                  | ERO1-like (S. cerevisiae)                                                      |      |
| NM_172616   | 12     | A        | 51     | P        | 3.73         | I    | C330027C09             | RIKEN cDNA C330027C09 gene                                                     |      |
| NM_025910   | 40     | P        | 161    | P        | 3.73         | I    | Mina                   | myc induced nuclear antigen                                                    |      |
| NM_027220   | 196    | P        | 691    | P        | 3.73         | I    | Prss32                 | protease, serine, 32                                                           |      |
| NM_198414   | 20     | A        | 84     | P        | 3.73         | I    | Paq9r                  | progesterin and adipoQ receptor family member IX                               |      |
| NM_008251   | 200    | P        | 644    | P        | 3.73         | I    | Hmgm1                  | high mobility group nucleosomal binding domain 1                               |      |
| NM_010880   | 24     | P        | 137    | P        | 3.73         | I    | Ncl                    | nucleolin                                                                      |      |
| NM_053074   | 83     | P        | 337    | P        | 4.00         | I    | Nup62                  | nucleoporin 62                                                                 |      |
| NM_010798   | 97     | P        | 274    | P        | 4.00         | I    | Mif                    | macrophage migration inhibitory factor                                         |      |
| NM_008583   | 28     | P        | 112    | P        | 4.00         | I    | Mcm3 /// LOC           | minichromosome maintenance deficient 3 (S. cerevisiae) /// similar to D        |      |
| NM_010259   | 47     | P        | 192    | P        | 4.00         | I    | Csbp1                  | guanilate nucleoside binding protein 1                                         |      |
| NM_008251   | 162    | P        | 746    | P        | 4.00         | I    | Hmgm1                  | high mobility group nucleosomal binding domain 1                               |      |
| NM_023493   | 267    | P        | 808    | P        | 4.00         | I    | Cml5                   | camelot-like 5                                                                 |      |
| NM_172952   | 33     | P        | 122    | P        | 4.00         | I    | Gphn                   | gephyrin                                                                       |      |
| ---         | 14     | M        | 68     | P        | 4.00         | I    | 6430710C18R            | RIKEN cDNA 6430710C18R gene                                                    |      |
| NM_007646   | 320    | P        | 1226   | P        | 4.00         | I    | Cd38                   | CD38 antigen                                                                   |      |
| NM_029432   | 37     | P        | 166    | P        | 4.00         | I    | RIKEN cDNA 4930402H24R | RIKEN cDNA 4930402H24R gene                                                    |      |
| NM_007918   | 265    | P        | 1226   | P        | 4.00         | I    | Erf4b01                | eukaryotic translation initiation factor 4E binding protein 1                  |      |
| NM_009104   | 23     | P        | 111    | P        | 4.00         | I    | Rrm2                   | ribonucleotide reductase M2                                                    |      |
| NM_019395   | 836    | P        | 3551   | P        | 4.00         | I    | Fbp1                   | fructose biphosphatase 1                                                       |      |
| NM_007607   | 1168   | P        | 4775   | P        | 4.00         | I    | Car4                   | carbonic anhydrase 4                                                           |      |
| NM_025872   | 15     | A        | 54     | P        | 4.00         | I    | Golt1b                 | golgi transport 1 homolog B (S. cerevisiae)                                    |      |
| NM_007399   | 57     | P        | 220    | P        | 4.00         | I    | Adam10                 | a disintegrin and metalloproteinase domain 10                                  |      |
| NM_007646   | 80     | P        | 278    | P        | 4.00         | I    | Cd38                   | CD38 antigen                                                                   |      |
| NM_007599   | 29     | P        | 132    | P        | 4.00         | I    | Capg                   | capping protein (actin filament), gelsolin-like                                |      |
| NM_146217   | 417    | P        | 1618   | P        | 4.00         | I    | Aars                   | alanyl-tRNA synthetase                                                         |      |
| NM_145588   | 17     | A        | 73     | P        | 4.00         | I    | Klf22                  | kinesin family member 22                                                       |      |
| NM_011605   | 94     | P        | 415    | P        | 4.00         | I    | Tmpo                   | thymopoietin                                                                   |      |

| Transcript | WT     |          | KO     |          | Change KO/WT |      | Symbol        | Title                                                                           | Gene |
|------------|--------|----------|--------|----------|--------------|------|---------------|---------------------------------------------------------------------------------|------|
|            | Signal | Detectio | Signal | Detectio | Fold         | Call |               |                                                                                 |      |
| NM_172015  | 39     | P        | 162    | P        | 4.00         | I    | Iars          | isoleucine-tRNA synthetase                                                      |      |
| NM_007513  | 136    | P        | 578    | P        | 4.00         | I    | Slc7a1        | solute carrier family 7 (cationic amino acid transporter, y+ system), membe     |      |
| NM_007513  | 119    | P        | 427    | P        | 4.00         | I    | Slc7a1        | solute carrier family 7 (cationic amino acid transporter, y+ system), membe     |      |
| NM_008538  | 88     | P        | 510    | P        | 4.00         | I    | Marcks        | myristoylated alanine rich protein kinase C substrate                           |      |
| NM_172381  | 20     | P        | 111    | P        | 4.00         | I    | A1314180      | expressed sequence A1314180                                                     |      |
| NM_0010332 | 15     | P        | 138    | P        | 4.00         | I    | Slc4a7        | solute carrier family 4, sodium bicarbonate cotransporter, member 7             |      |
| NM_178883  | 18     | P        | 83     | P        | 4.00         | I    | Scy1tbp1      | SCY1-like 1 binding protein 1                                                   |      |
| ---        | 32     | P        | 116    | P        | 4.00         | I    | ---           | 0 day neonate cerebellum cDNA, RIKEN full-length enriched library, clone        |      |
| NM_011710  | 118    | P        | 598    | P        | 4.29         | I    | Wars          | tryptophanyl-tRNA synthetase                                                    |      |
| NM_008538  | 117    | P        | 570    | P        | 4.29         | I    | Marcks        | myristoylated alanine rich protein kinase C substrate                           |      |
| NM_025281  | 37     | P        | 177    | P        | 4.29         | I    | Lyar          | Ly1 antibody reactive clone                                                     |      |
| NM_007918  | 284    | P        | 992    | P        | 4.29         | I    | Erf4ebp1      | eukaryotic translation initiation factor 4E binding protein 1                   |      |
| NM_010481  | 233    | P        | 1159   | P        | 4.29         | I    | Hsp98a        | heat shock protein 9A                                                           |      |
| NM_010481  | 503    | P        | 2271   | P        | 4.29         | I    | Hsp98a        | heat shock protein 9A                                                           |      |
| NM_015774  | 349    | P        | 1509   | P        | 4.29         | I    | Ero1f         | ERO1-like (S. cerevisiae)                                                       |      |
| NM_015774  | 152    | P        | 824    | P        | 4.29         | I    | Ero1f         | ERO1-like (S. cerevisiae)                                                       |      |
| NM_026515  | 118    | P        | 430    | P        | 4.29         | I    | 2810417H13R   | RIKEN cDNA 2810417H13R gene                                                     |      |
| NM_024184  | 22     | A        | 77     | P        | 4.29         | MI   | Asf1b         | ASF1 anti-silencing function 1 homolog B (S. cerevisiae)                        |      |
| NM_022310  | 1227   | P        | 5977   | P        | 4.29         | I    | Hsp5a         | heat shock 70kD protein 5 (glucose-regulated protein)                           |      |
| NM_026149  | 27     | P        | 113    | P        | 4.29         | I    | Nudcd1        | NudC domain containing 1                                                        |      |
| NM_0010331 | 52     | P        | 299    | P        | 4.29         | I    | 4930403C10R   | RIKEN cDNA 4930403C10 gene                                                      |      |
| NM_145222  | 107    | P        | 481    | P        | 4.29         | I    | B3gn7         | UDP-GlcNAc:betaGal beta-1,3-N-acetylglucosaminyltransferase 7                   |      |
| NM_198200  | 13     | A        | 66     | P        | 4.29         | I    | Trm1f         | TRM1 tRNA methyltransferase 1 homolog (S. cerevisiae)                           |      |
| NM_023835  | 43     | P        | 254    | P        | 4.29         | I    | Trim12        | tripartite motif protein 12                                                     |      |
| NM_145495  | 20     | P        | 94     | P        | 4.29         | I    | Rin1          | Ras and Rab interactor 1                                                        |      |
| NM_023042  | 18     | A        | 75     | P        | 4.29         | I    | Recqf         | RecQ protein-like                                                               |      |
| NM_008571  | 27     | A        | 143    | P        | 4.29         | I    | Mcp2          | mast cell protease 2                                                            |      |
| NM_013538  | 53     | P        | 186    | P        | 4.29         | I    | Cdc3a         | cell division cycle associated 3                                                |      |
| NM_023731  | 14     | A        | 57     | P        | 4.29         | I    | Ccdcb6        | colled-coil domain containing 6b                                                |      |
| NM_173374  | 121    | P        | 516    | P        | 4.29         | I    | Sfrs1         | splicing factor, arginine/serine-rich 1 (ASF/SP2)                               |      |
| NM_029432  | 26     | A        | 117    | P        | 4.29         | I    | 4930402H24R   | RIKEN cDNA 4930402H24R gene                                                     |      |
| NM_009042  | 443    | P        | 2057   | P        | 4.59         | I    | Reg1          | regenerating islet-derived 1                                                    |      |
| NM_008538  | 267    | P        | 1171   | P        | 4.59         | I    | Marcks        | myristoylated alanine rich protein kinase C substrate                           |      |
| ---        | 88     | P        | 464    | P        | 4.59         | I    | ---           | 0 day neonate cerebellum cDNA, RIKEN full-length enriched library, clone        |      |
| NM_023627  | 31     | P        | 184    | P        | 4.59         | I    | Ilsyn1f       | myo-inositol 1-phosphate synthase A1                                            |      |
| NM_008638  | 43     | P        | 273    | P        | 4.59         | I    | Mthrd2        | methylene tetrahydrofolate dehydrogenase (NAD+ dependent), methenyltet          |      |
| NM_019578  | 24     | P        | 156    | P        | 4.59         | I    | Ext1f         | exostosins (type)-like 1                                                        |      |
| NM_013559  | 52     | P        | 302    | P        | 4.59         | I    | Hsp110        | heat shock protein 110                                                          |      |
| NM_146217  | 434    | P        | 1971   | P        | 4.59         | I    | Aars          | alanyl-tRNA synthetase                                                          |      |
| NM_013559  | 104    | P        | 409    | P        | 4.59         | I    | Hsp110        | heat shock protein 110                                                          |      |
| NM_0010393 | 20     | P        | 103    | P        | 4.59         | I    | Nolc1         | nucleolar and coiled-body phosphoprotein 1                                      |      |
| ---        | 41     | P        | 176    | P        | 4.59         | I    | 2610024B07R   | RIKEN cDNA 2610024B07 gene                                                      |      |
| NM_0010377 | 13     | P        | 51     | P        | 4.59         | I    | D330017J20R   | RIKEN cDNA D330017J20 gene                                                      |      |
| NM_011710  | 216    | P        | 1002   | P        | 4.59         | I    | Wars          | tryptophanyl-tRNA synthetase                                                    |      |
| NM_0010302 | 274    | P        | 1505   | P        | 4.59         | I    | Olfm4         | olfactomedin 4                                                                  |      |
| NM_178726  | 15     | A        | 62     | P        | 4.59         | I    | Ppm1f         | protein phosphatase 1 (formerly 2C)-like                                        |      |
| NM_145457  | 13     | A        | 57     | P        | 4.59         | I    | Paip1 /// LOC | polyadenylate binding protein-interacting protein 1 /// similar to poly(A) bind |      |
| NM_153171  | 19     | P        | 177    | P        | 4.59         | I    | Rgs13         | regulator of G-protein signaling 13                                             |      |
| NM_028760  | 18     | P        | 76     | P        | 4.59         | I    | Cep55         | centrosomal protein 55                                                          |      |
| NM_0010385 | 11     | A        | 51     | P        | 4.59         | MI   | Usp14         | ubiquitin specific peptidase 14                                                 |      |
| NM_017397  | 15     | P        | 82     | P        | 4.92         | I    | Ddx20         | DEAD (Asp-Glu-Ala-Asp) box polypeptide 20                                       |      |
| NM_016675  | 99     | P        | 455    | P        | 4.92         | I    | Cldn2         | claudin 2                                                                       |      |
| NM_007598  | 256    | P        | 1211   | P        | 4.92         | I    | Cap1          | CAP, adenylate cyclase-associated protein 1 (yeast)                             |      |
| NM_020574  | 70     | P        | 270    | P        | 4.92         | I    | Kcnc3         |                                                                                 |      |

| Transcript   | WT     |          | KO     |          | Change KO/WT |     | Symbol          | Title                                                                                                                                                                                                                                         | Gene |
|--------------|--------|----------|--------|----------|--------------|-----|-----------------|-----------------------------------------------------------------------------------------------------------------------------------------------------------------------------------------------------------------------------------------------|------|
|              | Signal | Detectio | Signal | Detectio | Fold         | Can |                 |                                                                                                                                                                                                                                               |      |
| NM_144554 // | 127    | P        | 812    | P        | 6.06         | I   | Trib3           | tribbles homolog 3 (Drosophila)                                                                                                                                                                                                               |      |
| NM_007488    | 27     | P        | 128    | P        | 6.06         | I   | Arnt2           | aryl hydrocarbon receptor nuclear translocator 2                                                                                                                                                                                              |      |
| NM_028274    | 12     | A        | 100    | P        | 6.06         | I   | Exosc6          | exosome component 6                                                                                                                                                                                                                           |      |
| NM_028355    | 11     | A        | 69     | P        | 6.06         | I   | Tmem48          | transmembrane protein 48                                                                                                                                                                                                                      |      |
| NM_011234    | 13     | A        | 103    | P        | 6.50         | I   | Rad51           | RAD51 homolog (S. cerevisiae)                                                                                                                                                                                                                 |      |
| NM_023137    | 434    | P        | 2825   | P        | 6.50         | I   | Ubd             | ubiquitin D                                                                                                                                                                                                                                   |      |
| NM_008570    | 16     | A        | 116    | P        | 6.50         | I   | Mcpt1           | mast cell protease 1                                                                                                                                                                                                                          |      |
| NM_010416    | 84     | P        | 429    | P        | 6.50         | I   | Hemt1           | hematopoietic cell transcript 1                                                                                                                                                                                                               |      |
| NM_198246    | 12     | P        | 85     | P        | 6.50         | I   | Yars2           | tyrosyl-tRNA synthetase 2 (mitochondrial)                                                                                                                                                                                                     |      |
| NM_177420    | 26     | A        | 108    | P        | 6.50         | I   | Psat1           | phosphoserine aminotransferase 1                                                                                                                                                                                                              |      |
| NM_00102560  | 15     | A        | 132    | P        | 6.50         | I   | Gm905           | gene model 905, (NCBI)                                                                                                                                                                                                                        |      |
| NM_008638    | 59     | P        | 352    | P        | 6.96         | I   | Mthfd2          | methylenetetrahydrofolate dehydrogenase (NAD+ dependent), methylenetetrahydrofolate cyclohydrolase                                                                                                                                            |      |
| NM_177420    | 14     | P        | 90     | P        | 6.96         | I   | Psat1           | phosphoserine aminotransferase 1                                                                                                                                                                                                              |      |
| NM_144554 // | 92     | P        | 525    | P        | 6.96         | I   | Trib3           | tribbles homolog 3 (Drosophila)                                                                                                                                                                                                               |      |
| NM_026041    | 4      | A        | 58     | P        | 7.46         | I   | 2810430M08      | RIKEN cDNA 2810430M08 gene                                                                                                                                                                                                                    |      |
| NM_198119    | 12     | A        | 103    | P        | 7.46         | I   | Lrrc24          | leucine rich repeat containing 24                                                                                                                                                                                                             |      |
| NM_197987    | 6      | A        | 56     | P        | 7.46         | MI  | Trim37          | tripartite motif protein 37                                                                                                                                                                                                                   |      |
| NM_00103344  | 60     | P        | 484    | P        | 7.46         | I   | Capn13          | calpain 13                                                                                                                                                                                                                                    |      |
| NM_018876    | 12     | A        | 93     | P        | 7.46         | I   | Fut2            | fucosyltransferase 2                                                                                                                                                                                                                          |      |
| NM_019748    | 6      | A        | 56     | P        | 8.00         | I   | Uble1a          | ubiquitin-like 1 (sentrin) activating enzyme E1A                                                                                                                                                                                              |      |
| NM_177912 // | 593    | P        | 4409   | P        | 8.00         | I   | 9030605I04R     | RIKEN cDNA 9030605I04 gene /// expressed sequence AI987692                                                                                                                                                                                    |      |
| NM_012055    | 216    | P        | 1467   | P        | 8.00         | I   | Asns            | asparagine synthetase                                                                                                                                                                                                                         |      |
| NM_009704    | 280    | P        | 2568   | P        | 8.57         | I   | Areg            | amphiregulin                                                                                                                                                                                                                                  |      |
| NM_012055    | 118    | P        | 1231   | P        | 8.57         | I   | Asns            | asparagine synthetase                                                                                                                                                                                                                         |      |
| NM_013602    | 19     | A        | 226    | P        | 8.57         | I   | Mt1             | metallothionein 1                                                                                                                                                                                                                             |      |
| NM_197987    | 7      | A        | 63     | P        | 9.19         | I   | Trim37          | tripartite motif protein 37                                                                                                                                                                                                                   |      |
| NM_011638    | 54     | P        | 430    | P        | 9.85         | I   | Tfrc            | transferrin receptor                                                                                                                                                                                                                          |      |
| NM_00100476  | 381    | P        | 3416   | P        | 9.85         | I   | Pla2g4c         | phospholipase A2, group IVC (cytosolic, calcium-independent)                                                                                                                                                                                  |      |
| NM_00103225  | 74     | P        | 664    | P        | 9.85         | I   | Bglap-rs1 /// B | bone gamma-carboxyglutamate protein, related sequence 1 /// bone gamma-carboxyglutamate protein 2                                                                                                                                             |      |
| NM_177912    | 157    | P        | 1585   | P        | 9.85         | I   | AI987692        | expressed sequence AI987692                                                                                                                                                                                                                   |      |
| NM_030728    | 9      | P        | 78     | P        | 10.56        | I   | 9930013L23F     | RIKEN cDNA 9930013L23 gene                                                                                                                                                                                                                    |      |
| NM_033149    | 8      | A        | 133    | P        | 10.56        | I   | B3gal5          | UDP-Gal:betaGalNAc beta 1,3-galactosyltransferase, polypeptide 5                                                                                                                                                                              |      |
| NM_029663    | 3      | A        | 50     | P        | 11.31        | I   | Gpatc4          | G patch domain containing 4                                                                                                                                                                                                                   |      |
| NM_145457    | 7      | A        | 86     | P        | 11.31        | I   | Paip1           | polyadenylate binding protein-interacting protein 1                                                                                                                                                                                           |      |
| NM_028929    | 55     | P        | 530    | P        | 11.31        | I   | Chac1           | ChaC, cation transport regulator-like 1 (E. coli)                                                                                                                                                                                             |      |
| NM_022018    | 28     | P        | 358    | P        | 11.31        | I   | Niban           | niban protein                                                                                                                                                                                                                                 |      |
| NM_00100476  | 150    | P        | 2120   | P        | 12.13        | I   | Pla2g4c         | phospholipase A2, group IVC (cytosolic, calcium-independent)                                                                                                                                                                                  |      |
| NM_134033    | 6      | A        | 86     | P        | 12.13        | I   | BC018601        | cDNA sequence BC018601                                                                                                                                                                                                                        |      |
| NM_011838    | 4      | A        | 69     | P        | 16.00        | I   | Tfrc            | transferrin receptor                                                                                                                                                                                                                          |      |
| NM_016866    | 5      | A        | 75     | P        | 18.38        | I   | Slk39           | serine/threonine kinase 39, STE20/SPS1 homolog (yeast)                                                                                                                                                                                        |      |
| NM_009171    | 4      | A        | 77     | P        | 18.38        | I   | Shmt1           | serine hydroxymethyl transferase 1 (soluble)                                                                                                                                                                                                  |      |
| NM_145495    | 32     | P        | 493    | P        | 21.11        | I   | Rin1            | Ras and Rab interactor 1                                                                                                                                                                                                                      |      |
| NM_021312    | 4      | A        | 73     | P        | 21.11        | I   | Wdr12           | WD repeat domain 12                                                                                                                                                                                                                           |      |
| NM_00101333  | 4      | A        | 58     | P        | 22.63        | I   | E130306D19      | RIKEN cDNA E130306D19 gene                                                                                                                                                                                                                    |      |
| NM_023220    | 2      | A        | 64     | P        | 22.63        | I   | 2010106G01      | RIKEN cDNA 2010106G01 gene                                                                                                                                                                                                                    |      |
| NM_029796    | 1      | A        | 75     | P        | 24.25        | I   | Lrg1            | leucine-rich alpha-2-glycoprotein 1                                                                                                                                                                                                           |      |
| NM_022018    | 11     | A        | 343    | P        | 24.25        | I   | Niban           | niban protein                                                                                                                                                                                                                                 |      |
| NM_054051    | 2      | A        | 123    | P        | 39.40        | I   | Pip5k2b         | Phosphatidylinositol-4-phosphate 5-kinase, type II, beta                                                                                                                                                                                      |      |
| NM_023881    | 3      | A        | 182    | P        | 45.25        | I   | Retnlb          | resistin like beta                                                                                                                                                                                                                            |      |
| XM_888097 // | 2      | A        | 95     | P        | 51.98        | I   | U90926          | cDNA sequence U90926                                                                                                                                                                                                                          |      |
| NM_00102520  | 1      | A        | 999    | P        | 194.01       | I   | H2-B1 /// 2410  | histocompatibility 2, blastocyst /// RIKEN cDNA 241001717 gene /// similar to MHC class I antigen precursor /// similar to RT1 class Ia, locus A2 /// similar to histocompatibility 2, blastocyst /// similar to RT1 class Ia, locus A1 /// s |      |

**Table S2: Genotype counts of the twenty single nucleotide polymorphisms that were genotyped in the three independent case-control IBD sample panels.** Marker Positions refer to NCBI's build 35 and nucleotides are listed for each SNP for the minor allele 1 (A1) and the major allele 2 (A2). Raw genotype counts are listed as A1A1/A1A2/A2A2. U: unaffected controls, CD: Crohn disease patients, UC: ulcerative colitis.

Logistic regression (forward selection) was used to analyse the full German case-control panel for potential epistatic effects with *NOD2*. No statistically significant interaction was observed between any of the 20 SNPs in *XBPI* and the known disease-associated variants in *NOD2* (rs2066844/Arg702Trp, rs2066845/Gly908Arg, rs2066847/Leu1007fs).

| #  | dbSNP ID   | Position   | A1 | A2 | Panel 1     |            |            | Panel 2     |             |            | Panel 3      |             |            |
|----|------------|------------|----|----|-------------|------------|------------|-------------|-------------|------------|--------------|-------------|------------|
|    |            |            |    |    | U (n=1103)  | CD (n=550) | UC (n=539) | U (n=2042)  | CD (n=1303) | UC (n=551) | U (n=2177)   | CD (n=909)  | UC (n=537) |
| 1  | rs714191   | 27,469,965 | C  | T  | 35/310/732  | 21/164/365 | 17/152/347 | 53/584/1316 | 34/410/848  | 20/155/369 | 72/624/1461  | 40/278/590  | 19/162/353 |
| 2  | rs5997391  | 27,470,093 | T  | C  | 10/134/959  | 3/56/487   | 0/51/488   | 8/242/1792  | 7/120/1164  | 0/51/500   | 17/263/1897  | 2/102/805   | 1/57/478   |
| 3  | rs5752792  | 27,478,313 | C  | T  | 28/287/754  | 13/157/369 | 23/143/345 | 61/535/1313 | 40/373/849  | 19/165/339 | 59/629/1436  | 32/277/591  | 19/154/351 |
| 4  | rs6005863  | 27,481,002 | G  | A  | 172/507/356 | 77/264/172 | 69/241/177 | 283/874/598 | 187/583/426 | 63/255/193 | 375/996/724  | 166/464/270 | 81/254/199 |
| 5  | rs5762788  | 27,499,324 | A  | C  | 104/478/472 | 47/218/261 | 29/162/164 | 185/929/906 | 114/479/640 | 29/156/197 | 233/892/984  | 88/405/395  | 49/199/279 |
| 6  | rs6005879  | 27,502,868 | A  | G  | 2/105/941   | 0/39/441   | 1/50/455   | 5/171/1617  | 1/82/1051   | 1/46/479   | 5/192/1925   | 1/92/807    | 0/55/474   |
| 7  | rs5752797  | 27,504,552 | T  | C  | 31/317/741  | 19/149/361 | 14/90/242  | 74/570/1357 | 39/331/876  | 8/105/267  | 74/605/1467  | 44/292/561  | 18/145/368 |
| 8  | rs5997403  | 27,505,938 | T  | C  | 2/98/979    | 0/42/504   | 1/47/469   | 3/167/1771  | 0/94/1209   | 1/44/497   | 5/177/1974   | 1/79/822    | 0/51/483   |
| 9  | rs5762795  | 27,507,054 | A  | C  | 103/505/479 | 48/223/263 | 40/228/251 | 186/908/922 | 116/496/658 | 37/221/271 | 238/919/995  | 92/407/400  | 49/199/284 |
| 10 | rs2267131  | 27,515,025 | C  | T  | 12/248/834  | 15/118/415 | 8/120/408  | 34/483/1517 | 25/265/997  | 6/114/422  | 33/493/1647  | 26/231/646  | 9/103/418  |
| 11 | rs2097461  | 27,516,433 | C  | T  | 94/492/458  | 47/230/263 | 38/227/239 | 167/829/820 | 116/510/652 | 36/214/272 | 229/906/977  | 89/410/396  | 49/197/283 |
| 12 | rs35873774 | 27,516,485 | C  | T  | 2/170/920   | 2/52/491   | 3/56/472   | 6/263/1758  | 6/159/1122  | 2/60/480   | 7/314/1844   | 2/95/805    | 3/45/484   |
| 13 | rs2269578  | 27,521,397 | C  | G  | 12/245/830  | 15/104/403 | 8/80/273   | 33/473/1511 | 24/255/985  | 5/77/309   | 33/481/1629  | 26/216/648  | 9/104/417  |
| 14 | rs3788409  | 27,522,705 | G  | T  | 105/511/470 | 47/212/244 | 29/144/149 | 186/910/896 | 115/481/609 | 30/129/179 | 237/923/976  | 89/401/386  | 49/201/280 |
| 15 | rs6005893  | 27,524,344 | T  | G  | 2/103/994   | 0/43/503   | 1/38/486   | 5/174/1862  | 2/86/1200   | 1/37/506   | 5/183/1988   | 1/90/813    | 0/58/479   |
| 16 | rs35679096 | 27,524,947 | A  | G  | 2/70/1027   | 1/29/509   | 0/19/343   | 7/137/1882  | 4/78/1198   | 1/20/376   | 2/131/1994   | 1/60/798    | 0/33/491   |
| 17 | rs133440   | 27,535,932 | C  | T  | 5/88/997    | 1/39/484   | 0/24/332   | 7/179/1832  | 3/113/1122  | 0/26/354   | 8/177/1957   | 1/70/824    | 1/60/466   |
| 18 | rs5762839  | 27,556,001 | T  | C  | 22/319/753  | 21/123/369 | 11/99/247  | 51/602/1366 | 33/299/909  | 9/90/280   | 65/596/1495  | 32/272/598  | 14/128/387 |
| 19 | rs5762852  | 27,567,027 | C  | T  | 22/310/726  | 20/134/343 | 11/103/244 | 49/550/1264 | 33/312/840  | 9/94/271   | 65/597/1472  | 32/272/597  | 14/129/385 |
| 20 | rs5762853  | 27,569,785 | G  | T  | 57/393/598  | 33/193/312 | 23/193/290 | 90/701/1015 | 64/433/778  | 22/190/319 | 136/766/1223 | 67/346/482  | 34/180/316 |

**Table S3. Results of a seven-marker haplotype analysis at the *XBPI* locus.** “ $f_{\text{controls}}$ ” and “ $f_{\text{IBD}}$ ” represent haplotype frequencies among controls and affected individuals, respectively.  $P$ -values refer to the null hypothesis of equal haplotype frequencies. Nominal  $P$ -values ( $P_{\text{nom}}$ ) are shown besides  $P$ -values after 10,000 permutations ( $P_{\text{perm}}$ ). The two SNPs that achieved the best model fit in a logistic regression analysis among all 20 SNPs in this study are highlighted in red. Numbers given above SNP designations refer to consecutive SNP numbers as assigned in the first column of Table 1.

|           | 2         | 3         | 4         | 9         | 10        | 12         | 18        |                       |                  |                  |                    |
|-----------|-----------|-----------|-----------|-----------|-----------|------------|-----------|-----------------------|------------------|------------------|--------------------|
| Haplotype | rs5997391 | rs5752792 | rs6005863 | rs5762795 | rs2267131 | rs35873774 | rs5762839 | $f_{\text{controls}}$ | $f_{\text{IBD}}$ | $P_{\text{nom}}$ | $P_{\text{perm}}$  |
| 1         | T         | T         | A         | C         | T         | C          | C         | 0.402                 | 0.404            | 0.81             | 1                  |
| 2         | T         | C         | A         | C         | T         | C          | C         | 0.173                 | 0.184            | <b>0.035</b>     | 0.212              |
| 3         | T         | T         | G         | A         | C         | C          | T         | 0.128                 | 0.127            | 0.71             | 1                  |
| 4         | T         | T         | G         | C         | T         | C          | C         | 0.101                 | 0.115            | <b>0.002</b>     | <b>0.014</b>       |
| 5         | T         | 2         | G         | A         | T         | T          | C         | 0.074                 | 0.058            | <b>0.000020</b>  | <b>&lt;0.00001</b> |
| 6         | T         | T         | G         | A         | T         | C          | C         | 0.048                 | 0.051            | 0.33             | 0.949              |
| 7         | C         | T         | G         | A         | T         | C          | T         | 0.038                 | 0.031            | <b>0.0032</b>    | <b>0.02</b>        |
| 8         | C         | T         | G         | A         | T         | C          | C         | 0.029                 | 0.024            | 0.060            | 0.348              |

**Table S4. Summary of deep sequencing of *XBPI*.** All five exons and the promoter were resequenced in 282 unaffected controls (**U**), 282 Crohn's disease (**CD**), and 282 ulcerative colitis (**UC**) patients (total of 846 samples); the five *XBPI* exons were sequenced in 282 additional **UC** patients. Fifty-one not yet annotated polymorphisms were identified (highlighted by bold type), including five rare non-synonymous (ns) SNPs (*XBPI*snp30, *XBPI*snp29, *XBPI*snp17, *XBPI*snp8, and *XBPI*snp22; underlined). Fifteen annotated SNPs were verified. Marker positions are in NCBI's build 35, and Δ indicates the distance in bp from the previous SNP.

Dark gray shading highlights rare SNPs that were only identified once within either **U**, **CD**, and/or **UC** patients; the 3 right columns indicate the panel(s) individual rare SNPs were detected in. Within the 846 controls and patients – with both coding region and promoter sequenced – rare SNPs were detected in 5, 16, and 18, controls, **CD**, and **UC** patients, respectively (in the additional 282 **UC** patients – with only exons sequenced – 3 additional rare SNPs were detected).

† SNPs genotyped as reported in Table 1 and Supplementary Table 2. § Significantly associated with IBD in panels 1+2+3 (see Table 1).

‡ Heterozygote counts of TaqMan-genotyped nsSNPs in Panels 1+2: *XBPI*snp17: 0×U, 4×CD, 2×UC; *XBPI*snp8: 0×U, 1×CD, 3×UC; *XBPI*snp30: 0×U, 1×CD, 1×UC; *XBPI*snp29: 0×U, 1×CD, 1×UC; *XBPI*snp22: 5×U, 5×CD, 3×UC; *rs5762809*: minor allele frequencies of 13% in **U**, 12% in **CD**, and 12% **UC**.

| SNP                            | Position   | Δ     | Location relative to <i>XBPI</i>                                                                                   | Sequence                                                                                                 | U | CD | UC |
|--------------------------------|------------|-------|--------------------------------------------------------------------------------------------------------------------|----------------------------------------------------------------------------------------------------------|---|----|----|
| <i>rs2267131</i> <sup>†</sup>  | 27,515,025 |       | 78bp downstream of exon 5                                                                                          |                                                                                                          |   |    |    |
| <i>XBPI</i> snp10              | 27,515,221 | 196   | exon 5, 496bp 3' UTR; highly conserved region                                                                      | AGGAAAAAATCCATCAAGCATTACATAGTAAATTTCTATAATTC[A/C]<br>CAAAGATTCTTGATCTTACTTGAAGTATACATGAGGGAAAGAGCCC      |   |    | •  |
| <i>XBPI</i> snp52              | 27,515,259 | 38    | exon 5, 458bp 3' UTR                                                                                               | TATAATTTCAAAAAGATTCTTGATCTTACTTGAAGTATACATGAGG[G/A]<br>AAAGAGCCCCCTCAGCAGGTTGCCGTTGCTTACAGAAGCAAACA      | • |    |    |
| <i>XBPI</i> snp26              | 27,515,480 | 221   | exon 5, 237bp 3' UTR                                                                                               | AGGGAAAACACCACCCTTTAAGATAAAAAGTACAATCTTAAAAGCT[G/A]<br>TAGTTCTCAATTATAGTAATTTCTTACTTCCAGTAATATGTCTCA     |   |    | •  |
| <i>XBPI</i> snp27              | 27,515,555 | 75    | exon 5, 162bp 3' UTR; highly conserved region                                                                      | ACTTCCAGTAATATGTCTCAATACCTTGGACTGCTGGATGCAAAAAG[A/G]<br>CAATACCTGGGGTCACTATGAGATCTGAACAAATAGAGGAATCT     |   |    | •  |
| <i>XBPI</i> snp30 <sup>‡</sup> | 27,515,798 | 243   | <b>exon 5; non-synonymous</b><br><b>(<i>XBPI</i>s: D350E; <i>XBPI</i>u: 290bp 3' UTR)</b>                          | GCAAAAAGTGTCTCCCAAGAAATGGTTTACACCAAGCAGAGAGGACAT[G/C]<br>TCACTGAATGGGGAAAGGGAAACCCCGTATCCACAGTCACTGTAAGC |   |    | •  |
| <i>XBPI</i> snp14              | 27,516,314 | 516   | intron 4/5                                                                                                         | ATATCAGACTGTAAGAGGCAAAAATTAATGAAGTACAACGTGTCAGA[A/C]<br>TACAATGGAAAATCTAACTGGAACACTTTGTACTGGGTCCATAATG   |   |    | •  |
| <i>XBPI</i> snp28              | 27,516,350 | 36    | intron 4/5                                                                                                         | CAACTGTGAGAATCAATGGAATACTAACTGGAACACTTTGTACTG[G/A]<br>GTTCCATAATGTAATAATGATCATTATGTGATAAAGATGACCTCGGGAC  |   |    | •  |
| <i>rs2097461</i> <sup>§</sup>  | 27,516,433 | 83    | intron 4/5                                                                                                         |                                                                                                          |   |    |    |
| <i>rs34842534</i>              | 27,516,452 | 19    | intron 4/5                                                                                                         |                                                                                                          |   |    |    |
| <i>rs35873774</i> <sup>§</sup> | 27,516,486 | 34    | intron 4/5                                                                                                         |                                                                                                          |   |    |    |
| <i>XBPI</i> snp25              | 27,516,557 | 71    | intron 4/5                                                                                                         | TCTAGTTAGGGATGTCAAGCATCAAACAGATGGAATTAACGTGTTAT[A/G]<br>TAGCTCTTAATAAGTCAGAAATGATCCCTACCTCTGAATCTGAAGAG  |   |    | •  |
| <i>XBPI</i> snp29 <sup>‡</sup> | 27,516,651 | 94    | <b>exon 4; non-synonymous (<i>XBPI</i>s: V171I;<br/><i>XBPI</i>u: Q179Q); 16bp downstream of<br/>splicing site</b> | GTCAATACCGCCAGAATCCATGGGGAGATGTTCTGGAGGGGTGACAA[C/T]<br>TGGGCCTGCACCTGCTGCAGAGGTGCACGTAGTCTGAGTGTGCGGA   |   |    | •  |
| <i>XBPI</i> snp17 <sup>‡</sup> | 27,516,704 | 53    | <b>exon 4; non-synonymous (A162P);<br/>10bp upstream of splicing site</b>                                          | CTGCACCTGTGCAGAGGTGCACGTAGTCTGAGTGTGCGGACTCAG[C/G]<br>AGACCCGGCCACTGGCCTCACTTCATTCCTCCCTGGGAGGAAAGACCAA  |   |    |    |
| <i>XBPI</i> snp20              | 27,516,822 | 118   | intron 3/4                                                                                                         | CCAAGGAAATGCTTGCTAGACAGCTGTGATTCTCAACTTTAAAGAAAT[I/C]<br>ACTTTTCAAAAAGATTCTAGGGTTAAATTTGCTATAGAACTTTATAT | • |    |    |
| <i>XBPI</i> snp24              | 27,517,566 | 744   | intron 3/4                                                                                                         | AACGCTTTGATCAGAAAGTCCAGACTGTAACATAAATCGTGGGTCA[T/C]<br>GTCACCTGGAACCACTCACATGAGGCACCAATAAAGGAGATGA       |   |    | •  |
| <i>XBPI</i> snp36              | 27,517,628 | 62    | exon 3, synonymous                                                                                                 | GTACTACATGAGGCACCAATAAAGGAGATGATTTACCTTGGCTT[C/T]<br>GCCTCTCTCAGCAACCCAGGGCATCCATCCCCAAGCCGCTGCTTAA      |   |    | •  |
| <i>XBPI</i> snp8 <sup>‡</sup>  | 27,517,655 | 27    | <b>exon 3, non-synonymous (M139I)</b>                                                                              | AGATGATTTACCTTGGCTTCCGCTCTCTTACGCAACCCAGGGCAT[C/T]<br>ATCCCCAAGCGCTGTCTTAACTCTGGTCTCAACTACAAGGCCATG      |   |    | •  |
| <i>XBPI</i> snp9               | 27,517,762 | 107   | intron 2/3                                                                                                         | TAAAGCTGATTTTCTAGCAAAAAGTTTTGGTCTGGAAGAAGTT[C/A/G]<br>TAAGAGGCTATTAACAATCTAATTATTTCAGTTAAGAATCACTTG      |   |    | •  |
| <i>XBPI</i> snp18              | 27,519,346 | 1,584 | intron 2/3                                                                                                         | TCACGCTTGGCCCTTTTTTTTTTTTTTTTTTTTTTGGTATTTTTGGG[I/A/G]<br>GAGACGGGATTTACCAATGTGGCTAGGCTGGTCTCAAACCTTGCC  |   |    |    |
| <i>XBPI</i> snp21              | 27,519,347 | 1     | intron 2/3                                                                                                         | CACGCTTGGCTTTTTTTTTTTTTTTTTTTTTTGGTATTTTTGGGTA[G/T]<br>AGACGGGATTTACCAATGTGGCTAGGCTGGTCTCAAACCTTGCT      |   |    |    |
| <i>rs34718288</i>              | 27,519,351 | 4     | intron 2/3                                                                                                         |                                                                                                          |   |    |    |
| <i>XBPI</i> snp23              | 27,519,411 | 60    | intron 2/3                                                                                                         | TGTTGGCTAGGCTGGTCTCAAACCTGCTGGCTTCAAGTATCTGCCCA[A/C]<br>CTCAGGCTCCCAAGTGTGGGATTACAGGCATGAGCCACCATGCC     |   |    | •  |
| <i>XBPI</i> snp35              | 27,519,723 | 312   | intron 1/2                                                                                                         | CTACTGTTTTTTTCAGTTTCTAGGAAGAGAAGGAAACATACACACT[G/A]<br>AGTCATATCAAACCTTATTTATGCTTTTATTTGAAAACCTTACCACG   |   |    | •  |
| <i>XBPI</i> snp13              | 27,519,766 | 43    | intron 1/2; highly conserved region                                                                                | CACTGAGTCATCAAACTTATTTATGCTTTATTTGAAAACCTTTA[C/A]<br>CAGCTGGTCTTTCATTTTTATTTACAGTATAAGACAGACTAATGAT      |   |    | •  |



| SNP                            | Position   | Δ     | Location relative to <i>XBP1</i>     | Sequence                                                                                               | U | CD | UC |
|--------------------------------|------------|-------|--------------------------------------|--------------------------------------------------------------------------------------------------------|---|----|----|
| <i>XBP1</i> snp1               | 27,520,860 | 1,094 | exon 1, synonymous                   | GGCCCCAGACCCCGGCCCTCGCCACCTCCTCAGCGCCTTCTCCTC[G/A]<br>GGGCTCAGGTGCGTGAGGCGCTGTCGCTTGGCGCCTGGGGCAGCCC   |   |    |    |
| <i>XBP1</i> snp44              | 27,520,875 | 15    | exon 1, synonymous                   | CCCCTGCCACCTCCTCAGCGCCTTCTCCTCGGGGCTCAGGTGCGT[G/A]<br>AGGCGCTGTCGCTTCCGCGCCTGGGGCAGCCCCCGCTCCTGCTC     |   | •  |    |
| <i>XBP1</i> snp22 <sup>‡</sup> | 27,521,023 | 148   | <b>exon 1; non-synonymous (P1SL)</b> | GGGCTCGGGCGGGAGGCGGGCTGCCCGACAGAACTTAA[G/A]<br>GGTCCCGTGGCGGGTTCGGCGGGCTGCCACCACCACATAGCT              |   |    | •  |
| rs5762809 <sup>‡</sup>         | 27,521,048 | 25    | exon 1, non-synonymous (A7S)         |                                                                                                        |   |    |    |
| rs2269575                      | 27,521,080 | 32    | exon 1, 14bp 5'UTR                   |                                                                                                        |   |    |    |
| <i>XBP1</i> snp2               | 27,521,088 | 8     | exon 1, 22bp 5'UTR                   | TTCGGCGGGCTGCCACCACCACATAGCTCCAGACTACGACCCGCG[C/A]<br>ACCGCGCGCCGACGCCGCCAGCGCCAGCCTCGCCGCGCCGGCCT     |   |    |    |
| <i>XBP1</i> snp48              | 27,521,091 | 3     | exon 1, 25bp 5'UTR                   | GGCGCGCTGCCACCACCACATAGCTCCAGACTACGACCCGCGCA[C/T]<br>CGCGCGCCAGCCGCCAGCGCCAGCCTCGCCGCGCCGGCCTTC        |   | •  |    |
| <i>XBP1</i> snp45              | 27,521,100 | 9     | exon 1, 34bp 5'UTR                   | GCCACCACCACATAGCTCCAGACTACGACCCGCGCACCGCGCCG[C/T]<br>AGCCGCCAGCGCCAGCCTCGCCGCGCCGGCCTTCTACGGTCTG       |   | •  |    |
| rs2269577                      | 27,521,311 | 211   | promoter, 197bp upstream of exon 1   |                                                                                                        |   |    |    |
| <i>XBP1</i> snp46              | 27,521,323 | 12    | promoter, 209bp upstream of exon 1   | AAAGGTACTTGGGTCAATTTCCGCGGGGGTTACGTGCGGGAGCGT[G/T]<br>TCCTCCAAAACGGAATTTCCCCCTTAAGCGGACTTATTTCCATCC    |   | •  |    |
| <i>XBP1</i> snp47              | 27,521,365 | 42    | promoter, 251bp upstream of exon 1   | AGCGTGTCTCCAAAACGGAATTTCCCCCTTAAGCGGACTTATTT[C/T]<br>CATCCGGAGTGACAGAATTTAATCCAAACCGAGAGCTTCCAGACT     |   | •  |    |
| rs2269578 <sup>‡</sup>         | 27,521,397 | 32    | promoter, 283bp upstream of exon 1   |                                                                                                        |   |    |    |
| <i>XBP1</i> snp3               | 27,521,469 | 72    | promoter, 355bp upstream of exon 1   | TTACCGGACTAACAGAGAATTACCTCAGCCTGACAACATTTATCT[C/T]<br>GTGCGCCACTTCGGGATCCGAGTGGAGCCGAAAGTCGAGATAGAGCG  |   | •  |    |
| <i>XBP1</i> snp19              | 27,521,656 | 187   | promoter, 542bp upstream of exon 1   | CCGTCTCAAAAAAAGAAAAAGAAAAAGCCTGGAAAGAAATTCGCG[G/T]<br>AATAGAAGTCTTAAGAAATGAGATCGTCCCTTAAAACTAAGTTT     |   |    | •  |
| <i>XBP1</i> snp15              | 27,521,820 | 164   | promoter, 706bp upstream of exon 1   | TTTTTCTTCAATTTAAAGTTTGTACTATGAGCGTGCATTTTTTT[A/T]<br>AATTTAGTTTTATTTTAAATAGAAACGAGGCTCAGCTGTG          |   |    |    |
| <i>XBP1</i> snp33              | 27,521,865 | 45    | promoter, 751bp upstream of exon 1   | TTAAATTTAGTTTTATTTTAAATAGAAACGAGGCTCAGCT[G/A]<br>TGTGCCAGGCTGATCTCGAATCTTGTAGCTCAAGTGAACCTCCCG         |   |    | •  |
| <i>XBP1</i> snp49              | 27,521,936 | 71    | promoter, 822bp upstream of exon 1   | TTCTGAGCTCAAGTGAACCTCCGCTTCGGCTCTATTTTATTTT[G/T]<br>TATTTTTTTTCTTATTTTGTAGACGGAGTCAGGCTCTGTCACCAG      |   | •  |    |
| <i>XBP1</i> snp41              | 27,522,008 | 72    | promoter, 894bp upstream of exon 1   | ACGGAGTCAGGCTCTGACACCGGCTGGAGTGCAGTGGCGAGAT[C/A/G]<br>GTCACCTGCAACCTTCGCTCCGGTTCAAGCAATTCCTCCTCA       |   | •  |    |
| <i>XBP1</i> snp4               | 27,522,253 | 245   | promoter, 1140bp upstream of exon 1  | ATTACAGGCGTAAGCCACTGCGCCAGCCTCTTGTATTTTAAATGA[G/T]<br>GGGACAGGAAAACGTCACATGTAGAGACTGAGACCCCGGGTTGACC   |   | •  | •  |
| <i>XBP1</i> snp31              | 27,522,607 | 354   | promoter, 1493bp upstream of exon 1  | GGGACGCACTATCCAGGTTCTAGGGGTGCAAAACAGTAAAGACTG[C/T]<br>TACCTGGTATTTGGAGGATATGCAAAAAGTAAATGTTAAGATAGCA   |   |    | •  |
| rs3788409 <sup>§</sup>         | 27,522,705 | 98    | promoter, 1591bp upstream of exon 1  |                                                                                                        |   |    |    |
| <i>XBP1</i> snp5               | 27,522,840 | 135   | promoter, 1726bp upstream of exon 1  | TTGGTTTTGCCAGGACTGGGCCACGAGTCTCCTAACGTGTTTTCTC[C/T]<br>CTCTCGITGGGAGGAAATCAATGATTTTTTTTTTTTAACTGGGC    |   |    |    |
| <i>XBP1</i> snp38              | 27,522,920 | 80    | promoter, 1806bp upstream of exon 1  | TTTTTTAACTGGGCTGTCCAACTCCAGAGCCTCCTGAGCACGTG[C/T/G]<br>TCTCTGTGGTTGGAAAAGAGGTGGGGGTGATGGAGTCTCTGCCGG   |   |    | •  |
| <i>XBP1</i> snp34              | 27,523,332 | 412   | promoter, 2218bp upstream of exon 1  | CCTTGGCTCCAAACTGTGGGATTCAGGCGAGAAACAGAGAG[C/A]<br>GGCCCTTTTATTTAATAGTAACTTATTAATGCAAAATGAAATG          |   |    | •  |
| <i>XBP1</i> snp39              | 27,523,672 | 340   | promoter, 2558bp upstream of exon 1  | ATGCAGTCTGAACATGTGAGTCCAAACCTTGGACAGTTTCATAT[C/G]<br>TCTTATAAAATGAACCTGGTAATCTTGCATCAGGTGCCATAAGTG     |   | •  |    |
| rs34042768                     | 27,523,699 | 27    | promoter, 2585bp upstream of exon 1  |                                                                                                        |   |    |    |
| rs6005892                      | 27,523,812 | 113   | promoter, 2698bp upstream of exon 1  |                                                                                                        |   |    |    |
| <i>XBP1</i> snp12              | 27,523,940 | 128   | promoter, 2826bp upstream of exon 1  | GTGAAACCCAGTCTCTACTAAAAATCAAAAATTAGCCGGACATGGT[G/T]<br>GGGGGCGCTGTAATCTCAGTACTGGGAGGCTGAGGCAGGATAAT    |   | •  | •  |
| <i>XBP1</i> snp6               | 27,524,198 | 258   | promoter, 3085bp upstream of exon 1  | TAAATAGGATCCAGAAAAGGAAAAAGAAAAATCTGTACACTG[G/A]<br>TAAGCAGAAAACAGAAAATAACATGGCAGGAATAAGTCCAAATATAT     |   |    |    |
| <i>XBP1</i> snp11              | 27,524,267 | 69    | promoter, 3153bp upstream of exon 1  | CATGGCAGGAATAAGTCCAAATATAAAATAAAAACATAAATGTG[A/G]<br>ATGGGTATATTAATCTTCTTAATCATGCTGTTTTGTTTTATGATGT    |   |    |    |
| <i>XBP1</i> snp32              | 27,524,281 | 14    | promoter, 3167bp upstream of exon 1  | GTCCAAATATAAAATAAAAACATAAATGTGAATGGGTATATTA[T/G]<br>CTCTTAATCATGCTGTTTTGTTTTATGATGCTCTTTATAAACAA       |   |    | •  |
| rs6005893 <sup>‡</sup>         | 27,524,344 | 63    | promoter, 3230bp upstream of exon 1  |                                                                                                        |   |    |    |
| <i>XBP1</i> snp42              | 27,524,484 | 140   | promoter, 3370bp upstream of exon 1  | ATTTACATTTTTTGTACTATATTTCTCAAGGAGGAGGATTGCT [T/G]<br>GAGGCCAGGAGTCAAGACCAGGCTGGGAAACATATTGTGACCTGT     |   |    | •  |
| <i>XBP1</i> snp37              | 27,524,592 | 108   | promoter, 3478bp upstream of exon 1  | TAAAAAAATTAACAGGCGTGGTACTTGCACCTGTAGTCCAGCT[G/A]<br>CTCGGAAGACGGAGGTGTAAGATCCCTTGAACCCAGGAGTTCGAGG     |   |    |    |
| <i>XBP1</i> snp16              | 27,524,610 | 18    | promoter, 3496bp upstream of exon 1  | CGTGGTACTTGCACCTGTAGTCCAGCTGCTCGGAAGACGGAGGT[G/A]<br>TAAGATCCCCTGAACCCAGGAGTTCGAGGCTGCAGTAAACTATGAGC   |   | •  |    |
| <i>XBP1</i> snp7               | 27,524,659 | 49    | promoter, 3546bp upstream of exon 1  | AAGATCCCTGAACCCAGGAGTTCGAGGCTGCAGTAAACTATGAGCT[A/G]<br>TGATTGAACCATGTACTCCAACCTGGGAGACAGAATGAGCTCCTGC  |   |    |    |
| rs5762812                      | 27,524,671 | 12    | promoter, 3557bp upstream of exon 1  |                                                                                                        |   |    |    |
| <i>XBP1</i> snp40              | 27,524,722 | 51    | promoter, 3608bp upstream of exon 1  | ACTCCAACCTGGGAGACAGAATGAGCTCCTGCCTCAAAAAACAAA[A/C]<br>TTTTTTAAAAAAAAGGAAAATGACTTACCAGCCATTTTATGTTA     |   |    | •  |
| rs35679096 <sup>‡</sup>        | 27,524,947 | 225   | promoter, 3833bp upstream of exon 1  |                                                                                                        |   |    |    |
| <i>XBP1</i> snp50              | 27,524,985 | 38    | promoter, 3871bp upstream of exon 1  | TAGCATGTCGGCTCACACCTGTAATCTCAGCACTTTGGGAGGCTGAG[G/A]<br>TCAGGGTTCAAGACCAGCCTGGTCAACATGGCGAAACCCCGTCTCT |   | •  |    |
| <i>XBP1</i> snp51              | 27,525,324 | 339   | promoter, 4210bp upstream of exon 1  | AGGTGGGAGGATCATTGAGCCAGAAAGATTGAGGCTGCAGTGAAG[C/G/A]<br>AGATGGTACCATGCACTCAAGCCTGGGTGACAGAGTGAGATCTGT  |   | •  |    |

**Table S5. Primer sequences**

| Gene name<br>(common name)        | forward                   | reverse                  | Suppl.<br>Ref            |
|-----------------------------------|---------------------------|--------------------------|--------------------------|
| <b>Human primers</b>              |                           |                          |                          |
| <i>HASPA5</i> (grp78, BiP)        | CATCACGCCGTCCTATGTCG      | CGTCAAAGACCGTGTCTCG      | (Wang and Seed, 2003)    |
| <i>GAPDH</i>                      | ATGGGGAAGGTGAAGGTGCG      | GGGGTCATTGATGGCAACAATA   | (Wang and Seed, 2003)    |
| <i>XBP1</i> splicing              | GGAGTTAAGACAGCGCTTGGGGA   | TGTTCTGGAGGGGTGACAACTGGG | *                        |
| <b>Mouse primers</b>              |                           |                          |                          |
| <i>Haspa5</i> (grp78; BiP)        | ACTTGGGGACCACCTATTCTCT    | ATCGCCAATCAGACGCTCC      | (Wang and Seed, 2003)    |
| <i>Defcr1</i> (cryptdin-1)        | AAGAGACTAAAAGTGGAGCAGC    | CGACAGCAGAGCGTGTA        | (Fre et al., 2005)       |
| <i>Defcr4</i> (cryptdin-4)        | GCTGTGTCTATCTCCTTGGAGGC   | CGTATTCCACAAGTCCCACGAAC  | (Kobayashi et al., 2005) |
| <i>Defcr5</i> (cryptdin-5)        | AGGCTGATCCTATCCACAAAACAG  | TGAAGAGCAGACCCTTCTTGGC   | (Kobayashi et al., 2005) |
| <i>Lysz</i> (lysozyme)            | ATGGAATGGCTGGCTACTATGG    | ACCAGTATCGGCTATTGATCTGA  | (Wang and Seed, 2003)    |
| <i>Muc2</i> (mucin-2)             | GCCTGTTTGATAGCTGCTATGTGCC | GTTCCGCCAGTCAATGCAGACAC  | *                        |
| <i>Camp</i> (cathelicidin)        | GCTGTGGCGGTCACTATCAC      | TGTCTAGGGACTGCTGGTTGA    | (Wang and Seed, 2003)    |
| <i>Xbp1</i>                       | AGCAGCAAGTGGTGGATTTG      | GAGTTTTCTCCCGTAAAAGCTGA  | (Wang and Seed, 2003)    |
| <i>Ddit3</i> (Chop)               | CTGGAAGCCTGGTATGAGGAT     | CAGGGTCAAGAGTAGTGAAGGT   | (Wang and Seed, 2003)    |
| <i>Atoh1</i> (Math1)              | GAGTGGGCTGAGGTAAAAGAGT    | GGTCGGTGCTATCCAGGAG      | (Wang and Seed, 2003)    |
| <i>Hes1</i>                       | CCAGCCAGTGTCAACACGA       | AATGCCGGGAGCTATCTTTCT    | (Wang and Seed, 2003)    |
| <i>Ctnnb1</i> ( $\beta$ -Catenin) | ATGGAGCCGGACAGAAAAGC      | CTTGCCACTCAGGGAAGGA      | (Wang and Seed, 2003)    |
| <i>Tcf4</i>                       | CGAGATATCAACGAGGCTTTCAAG  | CATGTGATTCGCTGCGTCTCC    | (Fre et al., 2005)       |
| <i>Tnf</i> (TNF $\alpha$ )        | CATCTTCTCAAAATTCGAGTGACAA | TGGGAGTAGACAAGGTACAACCC  | (Giulietti et al., 2001) |
| <i>Ifng</i> (IFN $\gamma$ )       | TCAAGTGGCATAGATGTGGAAGAA  | TGGCTCTGCAGGATTTTCATG    | (Giulietti et al., 2001) |
| <i>Il4</i> (IL-4)                 | ACAGGAGAAGGGACGCCAT       | GAAGCCCTACAGACGAGCTCA    | (Giulietti et al., 2001) |
| <i>Il10</i> (IL-10)               | GGTTGCCAAGCCTTATCGGA      | ACCTGCTCCACTGCCTTGCT     | (Giulietti et al., 2001) |
| <i>Il1b</i> (IL-1 $\beta$ )       | GCAACTGTTCTGAACTCAACT     | GCAACTGTTCTGAACTCAACT    | (Wang and Seed, 2003)    |
| <i>Il1rn</i> (IL-1Ra)             | GCTCATTGCTGGGTACTTACAA    | CCAGACTTGGCACAAGACAGG    | (Wang and Seed, 2003)    |
| <i>Ptgs2</i> (Cox2)               | TGAGCAACTATTCCAAACCAGC    | GCACGTAGTCTTCGATCACTATC  | (Wang and Seed, 2003)    |
| <i>Nos2</i> (iNOS)                | CAGCTGGGCTGTACAAACCTT     | CATTGGAAGTGAAGCGTTTCG    | (Giulietti et al., 2001) |
| <i>Actb</i> ( $\beta$ -actin)     | GATGCTCCCCGGGCTGTATT      | GGGGTACTTCAGGGTCAG GA    | *                        |
| <i>Xbp1</i> splicing              | ACACGCTTGGGAATGGACAC      | CCATGGGAAGATGTTCTGGG     | (Iwakoshi et al., 2003)  |

\* primers designed using Invitrogen VectorNTI software

**Table S6. Primers used for resequencing of the *XBP1* locus**

| Region   | Name           | Sequence                          | Touchdown PCR: T <sub>m</sub> [°C] | Amplicon length [bp] |
|----------|----------------|-----------------------------------|------------------------------------|----------------------|
| Promoter | XBP1_pr1.2_F   | 5'-GGGCTGCCCCGACAGAAG-3'          | 64.0/56.0                          | 543                  |
|          | XBP1_pr1.2_R   | 5'-TTTCGAACCCAAGGCCAAC-3'         |                                    |                      |
|          | XBP1_pr2.2_F   | 5'-TCCCTGGCCAAAGTACTTG-3'         | 66.5/58.5                          | 498                  |
|          | XBP1_pr2.2_R   | 5'-TGAAGGTATCCCTCCAACC-3'         |                                    |                      |
|          | XBP1_pr3.2_F   | 5'-GGAGCCGAAAGTCGAGATAG-3'        | 65.5/57.5                          | 781                  |
|          | XBP1_pr3.2_R   | 5'-CATGTGACGTTTTCTGTCC-3'         |                                    |                      |
|          | XBP1_pr4.4_F   | 5'-TTTTTCGTTCCATTCTAAAGTTTG-3'    | 65.5/57.5                          | 690                  |
|          | XBP1_pr4.4_R   | 5'-GGCATATTTACGGGGGTTTC-3'        |                                    |                      |
|          | XBP1_pr5.1_F   | 5'-CAAGTGAACCTCCCCTTCG-3'         | 66.5/58.5                          | 825                  |
|          | XBP1_pr5.1_R   | 5'-TCCCTCCCTACCAAAATAAATTGACC-3'  |                                    |                      |
|          | XBP1_pr6.1_F   | 5'-AGGGTGGCCAGGTGTTTGTG-3'        | 66.5/58.5                          | 687                  |
|          | XBP1_pr6.1_R   | 5'-CCCCACATCTGAAGGCACATC-3'       |                                    |                      |
|          | XBP1_pr7.1_F   | 5'-GGACATAGTTTTGGTTTTTCCAGGAC-3'  | 66.5/58.5                          | 690                  |
|          | XBP1_pr7.1_R   | 5'-ATCCCGCACCTGTGCTTTC-3'         |                                    |                      |
|          | XBP1_pr8.1b_F  | 5'-TGTTTTGGGAGAAGTCTGGAGGTG-3'    | 66.5/58.5                          | 738                  |
|          | XBP1_pr8.1b_R  | 5'-ACCGCGTTTGGCCTCAAAG-3'         |                                    |                      |
|          | XBP1_pr9.1b_F  | 5'-AGCACAGGGTGCGGGATG-3'          | 66.5/58.5                          | 725                  |
|          | XBP1_pr9.1b_R  | 5'-TTCTGTTTTCCCTTTCTGGAATGC-3'    |                                    |                      |
|          | XBP1_pr10.1_F  | 5'-TCGGTCTTTGAGGCCAAACG-3'        | 66.5/58.5                          | 701                  |
|          | XBP1_pr10.1_R  | 5'-GCAATCCTCCTGCCTTGAGAAATATAG-3' |                                    |                      |
|          | XBP1_pr11.1b_F | 5'-AGGAACAGAAATAAATAGGCATTCCAG-3' | 66.5/58.5                          | 736                  |
|          | XBP1_pr11.1b_R | 5'-CCTTCAATCAACATGAAATACCCTTC-3'  |                                    |                      |
|          | XBP1_pr12.1_F  | 5'-CCAGCTGCTCGGAAGACG-3'          | 66.5/58.5                          | 822                  |
|          | XBP1_pr12.1_R  | 5'-CGTGCCCAGCCAATTTTC-3'          |                                    |                      |
| Exon 1   | XBP1_ex1.1b_F  | 5'-CGCATCCCCAGCTCTGGTC-3'         | 60.0/52.0                          | 682                  |
|          | XBP1_ex1.1b_R  | 5'-CACGCCGACTCCATAGCC-3'          |                                    |                      |
| Exon 2   | XBP1_ex2.1b_F  | 5'-GGACTACAGGCACTCACGCTTGG-3'     | 71.0/63.0                          | 667                  |
|          | XBP1_ex2.1b_R  | 5'-CCAGTGCTGTGACGGGGATG-3'        |                                    |                      |
| Exon 3   | XBP1_ex3.1b_F  | 5'-GCCTTTAGGGGAAGAACAACACTCTG-3'  | 71.0/63.0                          | 499                  |
|          | XBP1_ex3.1b_R  | 5'-TGTTATTCTTGACCCCATGAAGTG-3'    |                                    |                      |
| Exon 4   | XBP1_ex4.1b_F  | 5'-TTGTCCAGAATGCCAACAGG-3'        | 71.0/63.0                          | 697                  |
|          | XBP1_ex4.1b_R  | 5'-TCCTCCAGGCAAAGATTCAAGC-3'      |                                    |                      |
| Exon 5   | XBP1_ex5.1b_F  | 5'-GCAGGCAGTAATTAAGGTGGAAAAG-3'   | 71.0/63.0                          | 699                  |
|          | XBP1_ex5.1b_R  | 5'-GCCTGTCTGTACTTCATTCAAAAAGC-3'  |                                    |                      |
|          | XBP1_ex5.2_F   | 5'-TGCCAAAAAGGGGGAAGAG-3'         | 68.0/60.0                          | 699                  |
|          | XBP1_ex5.2_R   | 5'-GACAGAGAGCCAAGCTAATGTGG-3'     |                                    |                      |
|          | XBP1_ex5.3_F   | 5'-GCTGGGGAAAGAGTTCATTGG-3'       | 68.0/60.0                          | 697                  |
|          | XBP1_ex5.3_R   | 5'-GGAGTGAAGGTAGATAAATGGTCTG-3'   |                                    |                      |

**Table S7. TaqMan primers and probes**

***XBPIsnp17 (A162P)***

Forward 5'-GAGGCACCAAATAAAGGAGATGAT-3'  
Reverse 5'-TGTAGTTGAGAACCAGGAGTTAAGACA-3'  
Probe-VIC 5'-CAGGGCATCTATC-3'  
Probe-FAM 5'-CAGGGCATCCATC-3'

***XBPIsnp8 (M139I)***

Forward 5'-TGCAGAGGTGCACGTAGTCT-3'  
Reverse 5'-TCCCAGGGGAATGAAGTG-3'  
Probe-VIC 5'-ACTCAGGAGACCCGG-3'  
Probe-FAM 5'-CTCAGCAGACCCGG-3'

***XBPIsnp22 (P15L)***

Forward 5'-GCCCCGACAGAAGCAGAA-3'  
Reverse 5'-GCTATGGTGGTGGTGGCA-3'  
Probe-FAM 5'-CGGGACCCTTAAAG-3'  
Probe-VIC 5'-ACGGGACCCTTAAAG-3'

***XBPIsnp29 (V179I / Q171Q)***

Forward 5'-GAGTCAATACCGCCAGAATCCAT-3'  
Reverse 5'-CGCAGCACTCAGACTACGT-3'  
Probe-FAM 5'-CCCAATTGTCACCCC-3'  
Probe-VIC 5'-CCCAGTTGTCACCCC-3'

***XBPIsnp30 (D350E)***

Forward 5'-TGTCTCCCAAGAATGGTTTACAC-3'  
Reverse 5'-CCTGCCTACTGGATGCTTACAG-3'  
Probe-FAM 5'-TTCAGTGAGATGTCC-3'  
Probe-VIC 5'-CATTTCAGTGACATGTCC-3'

***rs5762809 (A7S)***

Forward 5'-GCCCCGACAGAAGCAGAACT-3'  
Reverse 5'-AGGGCCACGACCGTAGAAA-3'  
Probe-VIC 5'-TTCGGCGTGGCTG-3'  
Probe-FAM 5'-TTCGGCGCGGCTG-3'

## Supplemental Experimental Procedures

### Mice

*Xbp1*<sup>flox/+</sup> (129;B6) and *Xbp1*<sup>flox/-</sup> (129;B6;Balb/c) mice were initially mated with Villin (V)-*Cre* transgenic mice (Madison et al., 2002) (Jackson Laboratories) to obtain *Xbp1*<sup>flox/flox</sup>*VCre* mice. Colony maintenance involved mating *Xbp1*<sup>flox/flox</sup>*VCre* × *Xbp1*<sup>flox/flox</sup> as well as *Xbp1*<sup>flox/wt</sup>*VCre* × *Xbp1*<sup>flox/flox</sup>. To exclude XBP1-unrelated phenotypes, we bred *Xbp1*<sup>flox/wt</sup>*VCre* × *Xbp1*<sup>flox/wt</sup> to obtain *Xbp1*<sup>wt/wt</sup>*VCre* mice, which were confirmed to be histologically and clinically indistinguishable from *Xbp1*<sup>wt/wt</sup> or *Xbp1*<sup>flox/wt</sup> mice. All experiments reported were performed with sex- and age-matched littermate “*Xbp1*<sup>-/-</sup>” (i.e. *Xbp1*<sup>flox/flox</sup>*VCre*), “*Xbp1*<sup>+/-</sup>” (i.e. *Xbp1*<sup>flox/wt</sup>*VCre*), and “*Xbp1*<sup>+/+</sup>” (i.e. *Xbp1*<sup>flox/flox</sup> or *Xbp1*<sup>flox/wt</sup>) mice obtained as above. For experiments involving time-dependent Cre-mediated deletion of the floxed *Xbp1* gene, we mated *Xbp1*<sup>floxneo/+</sup> (129;B6) mice (see Supplementary Fig. 1A) with *VCreER*<sup>T2</sup> (129;B6) mice kindly provided by Dr. Nicholas Davidson (Washington University, St. Louis) and Dr. Sylvie Robine (Institut Curie-CNRS, Paris) (el Marjou et al., 2004). Cre recombinase was activated by administration of 1mg tamoxifen (MP Biomedicals) intraperitoneally daily over 5 consecutive days. *EIIaCre* (Lakso et al., 1996; Holzenberger et al., 2000) transgenic mice were obtained from Jackson Laboratories. All mice were genotyped by PCR of genomic DNA isolated by phenol extraction and isopropanol precipitation of proteinase K-digested tails. Primer sequences are available upon request. All mouse protocols were approved by the Harvard Standing Committee on Animals.

### Immunohistochemistry

Tissues were collected in 10% neutral buffered formalin and embedded in paraffin. Sections were deparaffinized in isopropanol and graded alcohols, followed by antigen retrieval with Retrieval A solution according to manufacturer’s protocol (Becton Dickinson), and endogenous peroxidase quenched by H<sub>2</sub>O<sub>2</sub>. Sections were then blocked for 30min with normal goat serum, and incubated overnight at 4°C with primary antibodies at dilutions recommended by the manufacturer. Secondary biotinylated anti-rabbit antibody (1:200) was added for 30 minutes followed by detection with streptavidin-HRP and development with DAB<sup>+</sup> chromogen according to manufacturer’s (DakoCytomation) recommendations. Slides were counterstained with Mayer’s hematoxylin, dehydrated, and mounted with Eukitt.

### Electron microscopy

Small intestinal tissue from sex-matched *Xbp1*<sup>+/+</sup> and *Xbp1*<sup>-/-</sup> littermates was fixed with 1.25% formaldehyde, 2.5% glutaraldehyde, 0.03% picric acid in 100mM sodium cacodylate buffer. After washing with 100mM sodium cacodylate buffer, tissues were treated for 1h with 1% osmium tetroxide and 1.5% potassium ferrocyanide, and then 30 min with 0.5% uranyl acetate in 50mM maleate buffer, pH 5.15. After dehydration in ethanol, tissues were treated for 1 h in propylenoxide and then embedded in Epon/Araldite resin. Ultrathin sections were collected on EM grids and observed by using a JEOL 1200EX transmission electron microscope at an operating voltage of 60 kV (with the kind assistance of Dr. Susumu Ito, Harvard Medical School).

### Oral *L. monocytogenes* infection

For colony forming units (c.f.u.) assay, fecal pellets were aseptically collected 10h after oral infection, and mice euthanized 72 hours after infection, and liver and spleen aseptically harvested. Fecal pellets, liver and spleen were homogenized in PBS, and serial dilutions of the homogenates plated on LB plates containing 200µg/ml streptomycin, incubated at 37 °C for 18 hours and c.f.u.

counted. *L. monocytogenes* burden in feces was expressed as c.f.u. per mg dry weight, whereas liver and spleen data were expressed as c.f.u. per organ. For the determination of dry weight, feces were aseptically collected, divided into two parts, weighed, and one part homogenized and serial dilutions plated. The other part was dried in a speed-vac to allow for accurate weighing to correct the colony counts for differences in water content.

### **Crypt isolation, stimulation, and bactericidal activity assays**

Small intestinal crypts were isolated following published protocols (Ayabe et al., 2000). In brief, the small intestinal lumen of adult mice was rinsed with ice-cold PBS and segments were everted and shaken in  $\text{Ca}^{++}$  and  $\text{Mg}^{++}$ -free PBS buffer containing 30mM EDTA to elute crypts. Villi and crypts eluted during 5min intervals were recovered by centrifugation at 700g and crypt fractions identified by light microscopy. Crypt numbers were estimated by hemocytometry and 2,000 crypts resuspended in iPIPES buffer containing 10 $\mu$ M carbamyl choline (CCh; Sigma) or 1 $\mu$ g/ml LPS and incubated for 30min at 37°C. For lysozyme detection, supernatants were harvested and proteins precipitated by trichloroacetic acid (TCA), precipitates resuspended in Laemmli's buffer and resolved on 12% SDS-PAGE. Rabbit anti-lysozyme (DakoCytomation) was used for detection by Western blotting. Bactericidal activity of crypt supernatants was assayed against  $1 \times 10^3$  c.f.u. *Salmonella typhimurium* cs015 as described (Ayabe et al., 2000).

### **In vivo intestinal permeability experiments**

Age-matched *Xbp1*<sup>+/+</sup> and *Xbp1*<sup>-/-</sup> littermates were perorally administered 0.6mg/g body weight of a 80mg/ml solution of FITC-dextran (Sigma), and peripheral blood collected 4h later (Karhausen et al., 2004). Dilutions of FITC-dextran in PBS were used as a standard curve, and absorption of 50 $\mu$ l serum or standard measured in a fluorometer at 488nm.

### **CD1d-restricted antigen presenting function of MODE-K cells** (van de Wal et al., 2003)

$1 \times 10^5$  MODE-K.iXBP and MODE-K.Ctrl cells were seeded in 96 well plates and allowed to adhere for 2-4h. The CD1d-binding model glycolipid  $\alpha$ -galactosyl-ceramide ( $\alpha$ GC) was then added at a concentration of 100ng/ml along with the indicated concentrations of SP600125. After 2h of incubation, MODE-K cells (Vidal et al., 1993) were washed and fixed with glutaraldehyde, followed by quenching with glycine, exactly as described (Kang and Cresswell, 2004). After 4 washes with media, the CD1d-restricted NKT cell hybridoma DN32.D3 (Bendelac et al., 1995) (kindly provided by Dr. Albert Bendelac, University of Chicago, Chicago, IL), which is activated upon recognition of  $\alpha$ GC presented by CD1d, was added to fixed MODE-K cells, and supernatants harvested after 18h assessed for IL-2 secretion by ELISA (BD Pharmingen).

### **Genotyping and sequencing**

Genomic DNA was prepared using a variety of methods and DNA samples evaluated by gel electrophoresis for the presence of high-molecular weight DNA. One  $\mu$ l of genomic DNA (30-300 ng) was amplified by the GenomiPhi (Amersham) whole genome amplification system and fragmented at 99°C for five minutes. One hundred ngs of DNA was dried overnight in TwinTec hardshell 384well plates (Eppendorf, Hamburg, Germany) at room temperature and genotyping performed using the SNPlex™ Genotyping System (Applied Biosystems, Foster City, CA). All process data were logged into, and administered by, a database-driven LIMS (Teuber et al., 2005). Graphical summaries of LD were created using GOLD 1.0 (Abecasis and Cookson, 2000).

Genomic DNA sequencing traces were visually inspected for the presence of SNPs and InDels using the software tool novoSNP (Weckx et al., 2005). The automated platform used for Taqman genotyping has been previously described (Hampe et al., 2001).

### **UPRE reporter assays**

Expression plasmids h*XBPIu* and h*XBPIs* were engineered to incorporate the *XBPIsnp17* (A162P), *XBPIsnp8* (M139I) and *XBPIsnp22* (P15L) minor variants using the GeneTailor site directed mutagenesis system (Invitrogen). Primers used were *XBPIsnp17\_R* AGACCCGGCCACTGGCCTCACTTCATTCCC, *XBPIsnp17\_F* TGAGGCCAGTGGCCGGG-TCTcCTGAGTCCGC; *XBPIsnp8\_R* ATCCCAAGCGCTGTCTTAACTCCTGGTTC, *XBPIsnp8\_F* TTAAGACAGCGCTTGGGGATaGATGCCCTGG; *XBPIsnp22\_F* CCGACAG-AAGCAGAACTTTAaGGGTCCCGTC, *XBPIsnp22\_R* TAAAGTTCTGCTTCTGTCTCGGGG-CAGCCCGC. Transient transfection of MODE-K cells followed by luciferase assays was performed as described previously (Lee et al., 2003). Briefly, cells plated in 24 well plates at 75,000 cells/well were transfected with 50 ng of UPRE-luciferase and various quantities of h*XBPI* plasmids by using lipofectamine 2000 reagent. pcDNA3.1 (Invitrogen) plasmid was added to adjust the total transfected DNA to 0.5 µg. Cells were treated for 16h with 1 µg/ml tunicamycin prior to harvest in certain experiments. Dual luciferase assays were performed following the protocol provided by the manufacturer (Promega). For reconstitution of *Xbp1*<sup>-/-</sup> MEF cells (Lee et al., 2003), bicistronic retroviral vectors expressing GFP and human *XBPI* were constructed by inserting PCR amplified cDNAs for wildtype and *XBPIsnp17* and *XBPIsnp8* variants of human *XBPI* into RV<sub>GFP</sub> vector between *BglII* and *Sall* sites, as described previously (Iwakoshi et al., 2003). Retroviruses produced from 293T cells were used to transduce *Xbp1*<sup>-/-</sup> MEF cells in the presence of polybrene. Two days later, cells were replated, attached overnight and treated with 1µg/ml tunicamycin for 6 hrs. Retroviral transduction efficiency was determined by FACS analysis of cells for GFP expression, as well as western blot of *XBPIs* after treating cells with tunicamycin. The levels of ERdj4 and EDEM mRNA were determined by real time PCR and are expressed normalized to β-actin mRNA content.

## Supplemental References

Abecasis,G.R. and Cookson,W.O. (2000). GOLD--graphical overview of linkage disequilibrium. *Bioinformatics*. *16*, 182-183.

Ayabe,T., Satchell,D.P., Wilson,C.L., Parks,W.C., Selsted,M.E., and Ouellette,A.J. (2000). Secretion of microbicidal alpha-defensins by intestinal Paneth cells in response to bacteria. *Nat. Immunol.* *1*, 113-118.

Bendelac,A., Lantz,O., Quimby,M.E., Yewdell,J.W., Bennink,J.R., and Brutkiewicz,R.R. (1995). CD1 recognition by mouse NK1+ T lymphocytes. *Science* *268*, 863-865.

el Marjou,F., Janssen,K.P., Chang,B.H., Li,M., Hindie,V., Chan,L., Louvard,D., Chambon,P., Metzger,D., and Robine,S. (2004). Tissue-specific and inducible Cre-mediated recombination in the gut epithelium. *Genesis*. *39*, 186-193.

Fre,S., Huyghe,M., Mourikis,P., Robine,S., Louvard,D., and Artavanis-Tsakonas,S. (2005). Notch signals control the fate of immature progenitor cells in the intestine. *Nature* *435*, 964-968.

Giulietti,A., Overbergh,L., Valckx,D., Decallonne,B., Bouillon,R., and Mathieu,C. (2001). An overview of real-time quantitative PCR: applications to quantify cytokine gene expression. *Methods* *25*, 386-401.

Hampe,J., Wollstein,A., Lu,T., Frevel,H.J., Will,M., Manaster,C., and Schreiber,S. (2001). An integrated system for high throughput TaqMan based SNP genotyping. *Bioinformatics*. *17*, 654-655.

Holzenberger,M., Lenzner,C., Leneuve,P., Zaoui,R., Hamard,G., Vaultont,S., and Bouc,Y.L. (2000). Cre-mediated germline mosaicism: a method allowing rapid generation of several alleles of a target gene. *Nucleic Acids Res.* *28*, E92.

Iwakoshi,N.N., Lee,A.H., Vallabhajosyula,P., Otipoby,K.L., Rajewsky,K., and Glimcher,L.H. (2003). Plasma cell differentiation and the unfolded protein response intersect at the transcription factor XBP-1. *Nat. Immunol.* *4*, 321-329.

Kang,S.J. and Cresswell,P. (2004). Saposins facilitate CD1d-restricted presentation of an exogenous lipid antigen to T cells. *Nat. Immunol.* *5*, 175-181.

Karhausen,J., Furuta,G.T., Tomaszewski,J.E., Johnson,R.S., Colgan,S.P., and Haase,V.H. (2004). Epithelial hypoxia-inducible factor-1 is protective in murine experimental colitis. *J. Clin. Invest* *114*, 1098-1106.

Kobayashi,K.S., Chamaillard,M., Ogura,Y., Henegariu,O., Inohara,N., Nunez,G., and Flavell,R.A. (2005). Nod2-dependent regulation of innate and adaptive immunity in the intestinal tract. *Science* *307*, 731-734.



Lakso,M., Pichel,J.G., Gorman,J.R., Sauer,B., Okamoto,Y., Lee,E., Alt,F.W., and Westphal,H. (1996). Efficient in vivo manipulation of mouse genomic sequences at the zygote stage. *Proc. Natl. Acad. Sci. U. S. A* 93, 5860-5865.

Lee,A.H., Iwakoshi,N.N., and Glimcher,L.H. (2003). XBP-1 regulates a subset of endoplasmic reticulum resident chaperone genes in the unfolded protein response. *Mol. Cell Biol.* 23, 7448-7459.

Madison,B.B., Dunbar,L., Qiao,X.T., Braunstein,K., Braunstein,E., and Gumucio,D.L. (2002). Cis elements of the villin gene control expression in restricted domains of the vertical (crypt) and horizontal (duodenum, cecum) axes of the intestine. *J. Biol. Chem.* 277, 33275-33283.

Teuber,M., Koch,W., Manaster,C., Waechter,S., Hampe,J., and et al (2005). Improving quality control and workflow management in high-throughput single-nucleotide polymorphism genotyping environments. *J. Assoc. Lab. Automat.* 10, 43-47.

van de Wal,Y., Corazza,N., Allez,M., Mayer,L.F., Iijima,H., Ryan,M., Cornwall,S., Kaiserlian,D., Hershberg,R., Koezuka,Y. et al (2003). Delineation of a CD1d-restricted antigen presentation pathway associated with human and mouse intestinal epithelial cells. *Gastroenterology* 124, 1420-1431.

Vidal,K., Grosjean,I., evillard,J.P., Gespach,C., and Kaiserlian,D. (1993). Immortalization of mouse intestinal epithelial cells by the SV40-large T gene. Phenotypic and immune characterization of the MODE-K cell line. *J. Immunol. Methods* 166, 63-73.

Wang,X. and Seed,B. (2003). A PCR primer bank for quantitative gene expression analysis. *Nucleic Acids Res.* 31, e154.

Weckx,S., Del Favero,J., Rademakers,R., Claes,L., Cruts,M., De Jonghe,P., Van Broeckhoven,C., and De Rijk,P. (2005). novoSNP, a novel computational tool for sequence variation discovery. *Genome Res.* 15, 436-442.
